# Supplementary material for: Conjugated donor–acceptor substituted systems involving the 1,3-indandione-derived electron accepting moieties
Source: Royal Society of Chemistry journal article supplement (doi:10.1039/d2ra05335g), 2022-01-01
Supplement: d2ra05335g1.pdf [file d2ra05335g1.pdf]

**1, 298 K, dichloromethane, B3LYP/aug-cc-pVDZ  
GS**

Standard orientation:

| Center<br>Number | Atomic<br>Number | Atomic<br>Type | Coordinates (Angstroms) |           |           |
|------------------|------------------|----------------|-------------------------|-----------|-----------|
|                  |                  |                | X                       | Y         | Z         |
| 1                | 6                | 0              | 5.085363                | 0.862245  | 0.000001  |
| 2                | 6                | 0              | 4.198968                | -1.842783 | 0.000002  |
| 3                | 6                | 0              | 6.003379                | -0.196414 | 0.000002  |
| 4                | 6                | 0              | 3.727579                | 0.545995  | -0.000000 |
| 5                | 6                | 0              | 3.290362                | -0.785731 | 0.000000  |
| 6                | 6                | 0              | 5.565449                | -1.532035 | 0.000002  |
| 7                | 6                | 0              | 1.791156                | -0.830053 | -0.000001 |
| 8                | 6                | 0              | 1.326429                | 0.573824  | -0.000002 |
| 9                | 6                | 0              | 2.533542                | 1.444162  | -0.000001 |
| 10               | 8                | 0              | 2.562770                | 2.672958  | -0.000002 |
| 11               | 8                | 0              | 1.137985                | -1.873927 | -0.000001 |
| 12               | 6                | 0              | 0.079484                | 1.166345  | -0.000001 |
| 13               | 6                | 0              | -1.268886               | 0.689465  | -0.000001 |
| 14               | 6                | 0              | -4.039287               | -0.060586 | 0.000000  |
| 15               | 6                | 0              | -1.667751               | -0.676112 | -0.000002 |
| 16               | 6                | 0              | -2.310539               | 1.659318  | 0.000000  |
| 17               | 6                | 0              | -3.646236               | 1.311451  | 0.000001  |
| 18               | 6                | 0              | -2.999626               | -1.040464 | -0.000002 |
| 19               | 7                | 0              | -5.351733               | -0.420606 | 0.000001  |
| 20               | 6                | 0              | -6.398607               | 0.597536  | 0.000005  |
| 21               | 6                | 0              | -5.734614               | -1.830080 | -0.000002 |
| 22               | 1                | 0              | 5.419985                | 1.898985  | 0.000000  |
| 23               | 1                | 0              | 3.855021                | -2.876394 | 0.000002  |
| 24               | 1                | 0              | 7.072936                | 0.014923  | 0.000003  |
| 25               | 1                | 0              | 6.302724                | -2.335248 | 0.000004  |
| 26               | 1                | 0              | 0.153059                | 2.259425  | -0.000001 |
| 27               | 1                | 0              | -0.898821               | -1.445007 | -0.000003 |
| 28               | 1                | 0              | -2.044603               | 2.717203  | 0.000001  |
| 29               | 1                | 0              | -4.394206               | 2.098879  | 0.000002  |
| 30               | 1                | 0              | -3.247952               | -2.098137 | -0.000002 |
| 31               | 1                | 0              | -6.335503               | 1.236690  | -0.893116 |
| 32               | 1                | 0              | -7.372859               | 0.103908  | 0.000008  |
| 33               | 1                | 0              | -6.335497               | 1.236689  | 0.893126  |
| 34               | 1                | 0              | -5.355323               | -2.347968 | -0.893172 |
| 35               | 1                | 0              | -5.355325               | -2.347972 | 0.893166  |
| 36               | 1                | 0              | -6.824526               | -1.900481 | -0.000004 |

**TSA2**

Standard orientation:

| Center<br>Number | Atomic<br>Number | Atomic<br>Type | Coordinates (Angstroms) |           |           |
|------------------|------------------|----------------|-------------------------|-----------|-----------|
|                  |                  |                | X                       | Y         | Z         |
| 1                | 6                | 0              | -5.086985               | 0.510572  | 0.000008  |
| 2                | 6                | 0              | -3.788560               | -2.025368 | -0.000046 |
| 3                | 6                | 0              | -5.825378               | -0.676402 | -0.000017 |
| 4                | 6                | 0              | -3.693717               | 0.412297  | 0.000006  |
| 5                | 6                | 0              | -3.052564               | -0.838683 | -0.000021 |
| 6                | 6                | 0              | -5.183436               | -1.929819 | -0.000044 |
| 7                | 6                | 0              | -1.569393               | -0.656575 | -0.000017 |
| 8                | 6                | 0              | -1.331481               | 0.823777  | 0.000016  |
| 9                | 6                | 0              | -2.672896               | 1.497508  | 0.000030  |
| 10               | 8                | 0              | -2.887534               | 2.701505  | 0.000056  |

|    |   |   |           |           |           |
|----|---|---|-----------|-----------|-----------|
| 11 | 8 | 0 | -0.738859 | -1.552664 | -0.000037 |
| 12 | 6 | 0 | -0.168871 | 1.505769  | 0.000033  |
| 13 | 6 | 0 | 1.202940  | 0.942144  | 0.000022  |
| 14 | 6 | 0 | 3.875444  | -0.077138 | 0.000001  |
| 15 | 6 | 0 | 1.884922  | 0.695907  | 1.200837  |
| 16 | 6 | 0 | 1.884924  | 0.695959  | -1.200803 |
| 17 | 6 | 0 | 3.188386  | 0.200723  | -1.208240 |
| 18 | 6 | 0 | 3.188384  | 0.200671  | 1.208254  |
| 19 | 7 | 0 | 5.154273  | -0.610781 | -0.000010 |
| 20 | 6 | 0 | 5.905180  | -0.661502 | -1.246308 |
| 21 | 6 | 0 | 5.905177  | -0.661565 | 1.246288  |
| 22 | 1 | 0 | -5.578823 | 1.482325  | 0.000029  |
| 23 | 1 | 0 | -3.288187 | -2.992775 | -0.000066 |
| 24 | 1 | 0 | -6.914677 | -0.636030 | -0.000016 |
| 25 | 1 | 0 | -5.787691 | -2.837082 | -0.000063 |
| 26 | 1 | 0 | -0.264300 | 2.598589  | 0.000058  |
| 27 | 1 | 0 | 1.391994  | 0.891466  | 2.153636  |
| 28 | 1 | 0 | 1.391997  | 0.891559  | -2.153594 |
| 29 | 1 | 0 | 3.666706  | 0.029690  | -2.168766 |
| 30 | 1 | 0 | 3.666703  | 0.029596  | 2.168773  |
| 31 | 1 | 0 | 6.086759  | 0.340975  | -1.674395 |
| 32 | 1 | 0 | 6.872302  | -1.136862 | -1.058655 |
| 33 | 1 | 0 | 5.378474  | -1.265113 | -1.997900 |
| 34 | 1 | 0 | 6.086764  | 0.340892  | 1.674421  |
| 35 | 1 | 0 | 5.378463  | -1.265204 | 1.997851  |
| 36 | 1 | 0 | 6.872294  | -1.136925 | 1.058616  |

## TSA1

Standard orientation:

| Center<br>Number | Atomic<br>Number | Atomic<br>Type | Coordinates (Angstroms) |           |           |
|------------------|------------------|----------------|-------------------------|-----------|-----------|
|                  |                  |                | X                       | Y         | Z         |
| 1                | 6                | 0              | 5.080572                | 0.464298  | 0.000024  |
| 2                | 6                | 0              | 3.740011                | -2.049611 | -0.000086 |
| 3                | 6                | 0              | 5.799030                | -0.734844 | -0.000018 |
| 4                | 6                | 0              | 3.685845                | 0.389325  | 0.000011  |
| 5                | 6                | 0              | 3.023935                | -0.850793 | -0.000044 |
| 6                | 6                | 0              | 5.136283                | -1.977378 | -0.000073 |
| 7                | 6                | 0              | 1.544022                | -0.644166 | -0.000046 |
| 8                | 6                | 0              | 1.330640                | 0.839916  | 0.000019  |
| 9                | 6                | 0              | 2.683110                | 1.491292  | 0.000050  |
| 10               | 8                | 0              | 2.917448                | 2.691588  | 0.000098  |
| 11               | 8                | 0              | 0.698976                | -1.526644 | -0.000093 |
| 12               | 6                | 0              | 0.180047                | 1.542029  | 0.000055  |
| 13               | 6                | 0              | -1.201962               | 1.004000  | 0.000038  |
| 14               | 6                | 0              | -3.897889               | 0.047632  | 0.000012  |
| 15               | 6                | 0              | -1.885437               | 0.761877  | 1.200813  |
| 16               | 6                | 0              | -1.885450               | 0.761979  | -1.200750 |
| 17               | 6                | 0              | -3.196879               | 0.288219  | -1.208092 |
| 18               | 6                | 0              | -3.196865               | 0.288116  | 1.208128  |
| 19               | 7                | 0              | -5.215444               | -0.383314 | 0.000001  |
| 20               | 6                | 0              | -5.813006               | -0.843472 | -1.245661 |
| 21               | 6                | 0              | -5.812985               | -0.843592 | 1.245629  |
| 22               | 1                | 0              | 5.588733                | 1.427612  | 0.000066  |
| 23               | 1                | 0              | 3.223521                | -3.008519 | -0.000128 |
| 24               | 1                | 0              | 6.888843                | -0.712604 | -0.000009 |
| 25               | 1                | 0              | 5.725309                | -2.894598 | -0.000104 |
| 26               | 1                | 0              | 0.295049                | 2.632973  | 0.000104  |
| 27               | 1                | 0              | -1.384038               | 0.934386  | 2.153629  |
| 28               | 1                | 0              | -1.384061               | 0.934569  | -2.153558 |

|    |   |   |           |           |           |
|----|---|---|-----------|-----------|-----------|
| 29 | 1 | 0 | -3.670571 | 0.105303  | -2.168702 |
| 30 | 1 | 0 | -3.670548 | 0.105119  | 2.168728  |
| 31 | 1 | 0 | -5.293060 | -1.722612 | -1.667314 |
| 32 | 1 | 0 | -6.856017 | -1.115470 | -1.059241 |
| 33 | 1 | 0 | -5.807794 | -0.046470 | -2.001487 |
| 34 | 1 | 0 | -5.293019 | -1.722761 | 1.667198  |
| 35 | 1 | 0 | -5.807779 | -0.046658 | 2.001526  |
| 36 | 1 | 0 | -6.855993 | -1.115594 | 1.059196  |

## TSD2

Standard orientation:

| Center<br>Number | Atomic<br>Number | Atomic<br>Type | Coordinates (Angstroms) |           |           |
|------------------|------------------|----------------|-------------------------|-----------|-----------|
|                  |                  |                | X                       | Y         | Z         |
| 1                | 6                | 0              | 5.069810                | 0.924974  | 0.000006  |
| 2                | 6                | 0              | 4.252256                | -1.803777 | -0.000058 |
| 3                | 6                | 0              | 6.012164                | -0.109383 | -0.000021 |
| 4                | 6                | 0              | 3.719121                | 0.574067  | -0.000000 |
| 5                | 6                | 0              | 3.315831                | -0.769368 | -0.000032 |
| 6                | 6                | 0              | 5.608068                | -1.457390 | -0.000052 |
| 7                | 6                | 0              | 1.823184                | -0.860281 | -0.000031 |
| 8                | 6                | 0              | 1.314247                | 0.540507  | 0.000004  |
| 9                | 6                | 0              | 2.510500                | 1.444756  | 0.000023  |
| 10               | 8                | 0              | 2.501598                | 2.669777  | 0.000053  |
| 11               | 8                | 0              | 1.195913                | -1.914762 | -0.000057 |
| 12               | 6                | 0              | 0.067667                | 1.100581  | 0.000024  |
| 13               | 6                | 0              | -1.287418               | 0.581422  | 0.000016  |
| 14               | 6                | 0              | -4.004223               | -0.226058 | 0.000010  |
| 15               | 6                | 0              | -2.336329               | 1.533983  | 0.000050  |
| 16               | 6                | 0              | -1.634743               | -0.789464 | -0.000022 |
| 17               | 6                | 0              | -2.972479               | -1.177067 | -0.000025 |
| 18               | 6                | 0              | -3.669850               | 1.139808  | 0.000048  |
| 19               | 7                | 0              | -5.369232               | -0.686161 | 0.000006  |
| 20               | 6                | 0              | -6.098347               | -0.308747 | 1.215633  |
| 21               | 6                | 0              | -6.098360               | -0.308686 | -1.215593 |
| 22               | 1                | 0              | 5.377401                | 1.969814  | 0.000030  |
| 23               | 1                | 0              | 3.934835                | -2.845628 | -0.000082 |
| 24               | 1                | 0              | 7.076049                | 0.128157  | -0.000017 |
| 25               | 1                | 0              | 6.366188                | -2.240719 | -0.000072 |
| 26               | 1                | 0              | 0.110650                | 2.195027  | 0.000052  |
| 27               | 1                | 0              | -2.090494               | 2.596455  | 0.000079  |
| 28               | 1                | 0              | -0.846140               | -1.537094 | -0.000048 |
| 29               | 1                | 0              | -3.239703               | -2.233162 | -0.000054 |
| 30               | 1                | 0              | -4.453952               | 1.896132  | 0.000075  |
| 31               | 1                | 0              | -5.535692               | -0.634541 | 2.098665  |
| 32               | 1                | 0              | -6.282120               | 0.780659  | 1.297407  |
| 33               | 1                | 0              | -7.070615               | -0.818855 | 1.216979  |
| 34               | 1                | 0              | -5.535715               | -0.634438 | -2.098648 |
| 35               | 1                | 0              | -7.070629               | -0.818791 | -1.216954 |
| 36               | 1                | 0              | -6.282132               | 0.780724  | -1.297312 |

## TSD1

Standard orientation:

| Center<br>Number | Atomic<br>Number | Atomic<br>Type | Coordinates (Angstroms) |           |          |
|------------------|------------------|----------------|-------------------------|-----------|----------|
|                  |                  |                | X                       | Y         | Z        |
| 1                | 6                | 0              | 5.081514                | 0.774361  | 0.000000 |
| 2                | 6                | 0              | 4.114741                | -1.905101 | 0.000001 |

|    |   |   |           |           |           |
|----|---|---|-----------|-----------|-----------|
| 3  | 6 | 0 | 5.965411  | -0.310373 | 0.000001  |
| 4  | 6 | 0 | 3.713553  | 0.498438  | -0.000000 |
| 5  | 6 | 0 | 3.236731  | -0.820691 | 0.000000  |
| 6  | 6 | 0 | 5.487592  | -1.634052 | 0.000002  |
| 7  | 6 | 0 | 1.741332  | -0.829163 | -0.000001 |
| 8  | 6 | 0 | 1.310487  | 0.597565  | -0.000002 |
| 9  | 6 | 0 | 2.554800  | 1.434435  | -0.000001 |
| 10 | 8 | 0 | 2.613427  | 2.658062  | -0.000002 |
| 11 | 8 | 0 | 1.056868  | -1.847539 | -0.000001 |
| 12 | 6 | 0 | 0.096990  | 1.226130  | -0.000001 |
| 13 | 6 | 0 | -1.285032 | 0.783900  | -0.000000 |
| 14 | 6 | 0 | -4.043161 | 0.131220  | 0.000001  |
| 15 | 6 | 0 | -2.278073 | 1.792657  | 0.000005  |
| 16 | 6 | 0 | -1.708773 | -0.566677 | -0.000005 |
| 17 | 6 | 0 | -3.064328 | -0.880385 | -0.000004 |
| 18 | 6 | 0 | -3.632581 | 1.471507  | 0.000006  |
| 19 | 7 | 0 | -5.454159 | -0.158647 | 0.000002  |
| 20 | 6 | 0 | -5.894205 | -0.851727 | -1.215727 |
| 21 | 6 | 0 | -5.894201 | -0.851739 | 1.215726  |
| 22 | 1 | 0 | 5.446193  | 1.800685  | -0.000001 |
| 23 | 1 | 0 | 3.740307  | -2.927817 | 0.000002  |
| 24 | 1 | 0 | 7.040761  | -0.131824 | 0.000001  |
| 25 | 1 | 0 | 6.201369  | -2.458005 | 0.000002  |
| 26 | 1 | 0 | 0.200919  | 2.316516  | 0.000000  |
| 27 | 1 | 0 | -1.974655 | 2.839903  | 0.000008  |
| 28 | 1 | 0 | -0.961882 | -1.356166 | -0.000008 |
| 29 | 1 | 0 | -3.366939 | -1.927192 | -0.000008 |
| 30 | 1 | 0 | -4.390609 | 2.253598  | 0.000011  |
| 31 | 1 | 0 | -5.569642 | -0.288308 | -2.098741 |
| 32 | 1 | 0 | -5.506843 | -1.886367 | -1.296344 |
| 33 | 1 | 0 | -6.991268 | -0.897892 | -1.218451 |
| 34 | 1 | 0 | -5.569634 | -0.288330 | 2.098744  |
| 35 | 1 | 0 | -6.991264 | -0.897903 | 1.218454  |
| 36 | 1 | 0 | -5.506840 | -1.886380 | 1.296330  |

## TSDA

Standard orientation:

| Center<br>Number | Atomic<br>Number | Atomic<br>Type | Coordinates (Angstroms) |           |           |
|------------------|------------------|----------------|-------------------------|-----------|-----------|
|                  |                  |                | X                       | Y         | Z         |
| 1                | 6                | 0              | 5.063314                | -0.514992 | -0.094931 |
| 2                | 6                | 0              | 3.758447                | 2.014360  | 0.042672  |
| 3                | 6                | 0              | 5.797943                | 0.673922  | -0.068063 |
| 4                | 6                | 0              | 3.670311                | -0.422218 | -0.052113 |
| 5                | 6                | 0              | 3.025951                | 0.825767  | 0.015862  |
| 6                | 6                | 0              | 5.152900                | 1.923980  | -0.000055 |
| 7                | 6                | 0              | 1.544824                | 0.638509  | 0.049432  |
| 8                | 6                | 0              | 1.311130                | -0.841800 | -0.002520 |
| 9                | 6                | 0              | 2.653904                | -1.510887 | -0.067421 |
| 10               | 8                | 0              | 2.869207                | -2.713020 | -0.122171 |
| 11               | 8                | 0              | 0.708872                | 1.527466  | 0.106915  |
| 12               | 6                | 0              | 0.150706                | -1.524617 | 0.002210  |
| 13               | 6                | 0              | -1.221096               | -0.960289 | 0.064404  |
| 14               | 6                | 0              | -3.861912               | 0.034748  | 0.179290  |
| 15               | 6                | 0              | -1.853832               | -0.760322 | 1.299867  |
| 16               | 6                | 0              | -1.925132               | -0.670358 | -1.115044 |
| 17               | 6                | 0              | -3.229687               | -0.174911 | -1.056188 |
| 18               | 6                | 0              | -3.160121               | -0.264551 | 1.352412  |
| 19               | 7                | 0              | -5.208001               | 0.545902  | 0.284247  |
| 20               | 6                | 0              | -6.210853               | -0.355987 | -0.288270 |

|    |   |   |           |           |           |
|----|---|---|-----------|-----------|-----------|
| 21 | 6 | 0 | -5.344631 | 1.911183  | -0.230406 |
| 22 | 1 | 0 | 5.557626  | -1.484007 | -0.147648 |
| 23 | 1 | 0 | 3.255784  | 2.979105  | 0.095212  |
| 24 | 1 | 0 | 6.886889  | 0.637825  | -0.100065 |
| 25 | 1 | 0 | 5.754538  | 2.832727  | 0.019310  |
| 26 | 1 | 0 | 0.237238  | -2.616293 | -0.045334 |
| 27 | 1 | 0 | -1.323755 | -0.985678 | 2.225200  |
| 28 | 1 | 0 | -1.448829 | -0.825775 | -2.083219 |
| 29 | 1 | 0 | -3.754256 | 0.050120  | -1.984710 |
| 30 | 1 | 0 | -3.648614 | -0.102825 | 2.312935  |
| 31 | 1 | 0 | -6.095414 | -1.357262 | 0.144030  |
| 32 | 1 | 0 | -7.212517 | 0.017146  | -0.035458 |
| 33 | 1 | 0 | -6.146655 | -0.441047 | -1.391568 |
| 34 | 1 | 0 | -6.343786 | 2.290112  | 0.023688  |
| 35 | 1 | 0 | -4.597518 | 2.559486  | 0.242911  |
| 36 | 1 | 0 | -5.222344 | 1.980264  | -1.329803 |

1, 298 K, dichloromethane, B3LYP/aug-cc-pVTZ

GS

Standard orientation:

| Center<br>Number | Atomic<br>Number | Atomic<br>Type | Coordinates (Angstroms) |           |           |
|------------------|------------------|----------------|-------------------------|-----------|-----------|
|                  |                  |                | X                       | Y         | Z         |
| 1                | 6                | 0              | 5.061621                | 0.863081  | -0.000059 |
| 2                | 6                | 0              | 4.190975                | -1.828416 | -0.002401 |
| 3                | 6                | 0              | 5.978926                | -0.185551 | -0.001704 |
| 4                | 6                | 0              | 3.712739                | 0.544685  | 0.000361  |
| 5                | 6                | 0              | 3.283024                | -0.781522 | -0.000749 |
| 6                | 6                | 0              | 5.548633                | -1.514986 | -0.002886 |
| 7                | 6                | 0              | 1.788794                | -0.832024 | 0.000052  |
| 8                | 6                | 0              | 1.321159                | 0.564385  | 0.001430  |
| 9                | 6                | 0              | 2.520202                | 1.436365  | 0.001761  |
| 10               | 8                | 0              | 2.545609                | 2.658781  | 0.002898  |
| 11               | 8                | 0              | 1.141958                | -1.872275 | -0.000498 |
| 12               | 6                | 0              | 0.080104                | 1.148799  | 0.001683  |
| 13               | 6                | 0              | -1.262436               | 0.675205  | 0.001430  |
| 14               | 6                | 0              | -4.023830               | -0.058961 | 0.000142  |
| 15               | 6                | 0              | -1.666688               | -0.681093 | 0.002404  |
| 16               | 6                | 0              | -2.295794               | 1.643525  | 0.000107  |
| 17               | 6                | 0              | -3.624914               | 1.303856  | -0.000724 |
| 18               | 6                | 0              | -2.992158               | -1.036910 | 0.002025  |
| 19               | 7                | 0              | -5.332981               | -0.412210 | -0.000840 |
| 20               | 6                | 0              | -6.375052               | 0.606912  | -0.008415 |
| 21               | 6                | 0              | -5.723017               | -1.816895 | 0.005455  |
| 22               | 1                | 0              | 5.389920                | 1.893214  | 0.000835  |
| 23               | 1                | 0              | 3.853334                | -2.855505 | -0.003315 |
| 24               | 1                | 0              | 7.038960                | 0.028459  | -0.002099 |
| 25               | 1                | 0              | 6.282598                | -2.309259 | -0.004199 |
| 26               | 1                | 0              | 0.150162                | 2.234374  | 0.001949  |
| 27               | 1                | 0              | -0.908733               | -1.448899 | 0.003204  |
| 28               | 1                | 0              | -2.026851               | 2.692198  | -0.000194 |
| 29               | 1                | 0              | -4.365037               | 2.087653  | -0.001359 |
| 30               | 1                | 0              | -3.244828               | -2.085275 | 0.002408  |
| 31               | 1                | 0              | -6.303996               | 1.243353  | -0.892951 |
| 32               | 1                | 0              | -7.344511               | 0.120755  | -0.017746 |
| 33               | 1                | 0              | -6.319632               | 1.241776  | 0.878546  |
| 34               | 1                | 0              | -5.354785               | -2.337795 | -0.880889 |

|    |   |   |           |           |          |
|----|---|---|-----------|-----------|----------|
| 35 | 1 | 0 | -5.344361 | -2.331990 | 0.890629 |
| 36 | 1 | 0 | -6.805625 | -1.882361 | 0.012385 |

## TSA2

Standard orientation:

| Center<br>Number | Atomic<br>Number | Atomic<br>Type | Coordinates (Angstroms) |           |           |
|------------------|------------------|----------------|-------------------------|-----------|-----------|
|                  |                  |                | X                       | Y         | Z         |
| 1                | 6                | 0              | -5.065029               | 0.511197  | 0.000008  |
| 2                | 6                | 0              | -3.780572               | -2.011899 | -0.000046 |
| 3                | 6                | 0              | -5.802553               | -0.666799 | -0.000017 |
| 4                | 6                | 0              | -3.679987               | 0.411376  | 0.000006  |
| 5                | 6                | 0              | -3.045302               | -0.834301 | -0.000021 |
| 6                | 6                | 0              | -5.167201               | -1.914413 | -0.000044 |
| 7                | 6                | 0              | -1.566456               | -0.657834 | -0.000017 |
| 8                | 6                | 0              | -1.326244               | 0.817057  | 0.000016  |
| 9                | 6                | 0              | -2.661408               | 1.491384  | 0.000030  |
| 10               | 8                | 0              | -2.873129               | 2.689277  | 0.000056  |
| 11               | 8                | 0              | -0.742801               | -1.551434 | -0.000036 |
| 12               | 6                | 0              | -0.169907               | 1.491437  | 0.000033  |
| 13               | 6                | 0              | 1.197831                | 0.930625  | 0.000021  |
| 14               | 6                | 0              | 3.860219                | -0.077204 | 0.000001  |
| 15               | 6                | 0              | 1.877723                | 0.687435  | 1.193552  |
| 16               | 6                | 0              | 1.877724                | 0.687485  | -1.193518 |
| 17               | 6                | 0              | 3.174945                | 0.198777  | -1.201170 |
| 18               | 6                | 0              | 3.174943                | 0.198726  | 1.201183  |
| 19               | 7                | 0              | 5.137500                | -0.602709 | -0.000010 |
| 20               | 6                | 0              | 5.888797                | -0.654034 | -1.242546 |
| 21               | 6                | 0              | 5.888793                | -0.654097 | 1.242526  |
| 22               | 1                | 0              | -5.550824               | 1.476792  | 0.000028  |
| 23               | 1                | 0              | -3.286120               | -2.973138 | -0.000066 |
| 24               | 1                | 0              | -6.882933               | -0.623861 | -0.000017 |
| 25               | 1                | 0              | -5.768301               | -2.813191 | -0.000062 |
| 26               | 1                | 0              | -0.260225               | 2.576801  | 0.000058  |
| 27               | 1                | 0              | 1.388228                | 0.879665  | 2.139382  |
| 28               | 1                | 0              | 1.388230                | 0.879756  | -2.139341 |
| 29               | 1                | 0              | 3.651251                | 0.029434  | -2.153805 |
| 30               | 1                | 0              | 3.651249                | 0.029342  | 2.153812  |
| 31               | 1                | 0              | 6.076660                | 0.341193  | -1.664221 |
| 32               | 1                | 0              | 6.846354                | -1.131949 | -1.056721 |
| 33               | 1                | 0              | 5.365238                | -1.246569 | -1.993628 |
| 34               | 1                | 0              | 6.076665                | 0.341110  | 1.664246  |
| 35               | 1                | 0              | 5.365227                | -1.246660 | 1.993580  |
| 36               | 1                | 0              | 6.846346                | -1.132014 | 1.056683  |

## TSA1

Standard orientation:

| Center<br>Number | Atomic<br>Number | Atomic<br>Type | Coordinates (Angstroms) |           |           |
|------------------|------------------|----------------|-------------------------|-----------|-----------|
|                  |                  |                | X                       | Y         | Z         |
| 1                | 6                | 0              | 5.058864                | 0.465333  | 0.000022  |
| 2                | 6                | 0              | 3.732892                | -2.036185 | -0.000087 |
| 3                | 6                | 0              | 5.776796                | -0.724698 | -0.000021 |
| 4                | 6                | 0              | 3.672351                | 0.388448  | 0.000011  |
| 5                | 6                | 0              | 3.017207                | -0.846572 | -0.000043 |
| 6                | 6                | 0              | 5.120938                | -1.961651 | -0.000074 |
| 7                | 6                | 0              | 1.541484                | -0.645915 | -0.000044 |
| 8                | 6                | 0              | 1.325429                | 0.832735  | 0.000020  |

|    |   |   |           |           |           |
|----|---|---|-----------|-----------|-----------|
| 9  | 6 | 0 | 2.671602  | 1.484998  | 0.000050  |
| 10 | 8 | 0 | 2.902778  | 2.679265  | 0.000099  |
| 11 | 8 | 0 | 0.703591  | -1.526237 | -0.000089 |
| 12 | 6 | 0 | 0.180979  | 1.527171  | 0.000055  |
| 13 | 6 | 0 | -1.197065 | 0.992256  | 0.000038  |
| 14 | 6 | 0 | -3.883592 | 0.050008  | 0.000011  |
| 15 | 6 | 0 | -1.878605 | 0.753723  | 1.193550  |
| 16 | 6 | 0 | -1.878617 | 0.753824  | -1.193487 |
| 17 | 6 | 0 | -3.183726 | 0.286577  | -1.201048 |
| 18 | 6 | 0 | -3.183715 | 0.286475  | 1.201084  |
| 19 | 7 | 0 | -5.196893 | -0.379156 | 0.000000  |
| 20 | 6 | 0 | -5.797810 | -0.835340 | -1.241990 |
| 21 | 6 | 0 | -5.797791 | -0.835458 | 1.241957  |
| 22 | 1 | 0 | 5.560710  | 1.422679  | 0.000064  |
| 23 | 1 | 0 | 3.222577  | -2.989111 | -0.000128 |
| 24 | 1 | 0 | 6.857731  | -0.699574 | -0.000013 |
| 25 | 1 | 0 | 5.707106  | -2.870236 | -0.000106 |
| 26 | 1 | 0 | 0.290881  | 2.610722  | 0.000105  |
| 27 | 1 | 0 | -1.380754 | 0.922994  | 2.139391  |
| 28 | 1 | 0 | -1.380774 | 0.923173  | -2.139319 |
| 29 | 1 | 0 | -3.655660 | 0.105801  | -2.153737 |
| 30 | 1 | 0 | -3.655640 | 0.105620  | 2.153762  |
| 31 | 1 | 0 | -5.291548 | -1.715067 | -1.658139 |
| 32 | 1 | 0 | -6.836311 | -1.094712 | -1.057173 |
| 33 | 1 | 0 | -5.784480 | -0.048282 | -1.996717 |
| 34 | 1 | 0 | -5.291511 | -1.715213 | 1.658023  |
| 35 | 1 | 0 | -5.784467 | -0.048466 | 1.996752  |
| 36 | 1 | 0 | -6.836289 | -1.094832 | 1.057127  |

## TSD2

Standard orientation:

| Center<br>Number | Atomic<br>Number | Atomic<br>Type | Coordinates (Angstroms) |           |           |
|------------------|------------------|----------------|-------------------------|-----------|-----------|
|                  |                  |                | X                       | Y         | Z         |
| 1                | 6                | 0              | -5.058741               | 0.775640  | -0.000001 |
| 2                | 6                | 0              | -4.107925               | -1.890726 | 0.000004  |
| 3                | 6                | 0              | -5.942148               | -0.299068 | 0.000001  |
| 4                | 6                | 0              | -3.699552               | 0.497391  | -0.000001 |
| 5                | 6                | 0              | -3.230280               | -0.816403 | 0.000002  |
| 6                | 6                | 0              | -5.472009               | -1.616815 | 0.000003  |
| 7                | 6                | 0              | -1.739776               | -0.831269 | 0.000001  |
| 8                | 6                | 0              | -1.305700               | 0.588332  | -0.000001 |
| 9                | 6                | 0              | -2.542387               | 1.427051  | -0.000003 |
| 10               | 8                | 0              | -2.597347               | 2.644379  | -0.000005 |
| 11               | 8                | 0              | -1.061765               | -1.846256 | 0.000003  |
| 12               | 6                | 0              | -0.098073               | 1.208596  | -0.000002 |
| 13               | 6                | 0              | 1.278345                | 0.769084  | -0.000002 |
| 14               | 6                | 0              | 4.026405                | 0.131140  | -0.000000 |
| 15               | 6                | 0              | 2.263315                | 1.775533  | -0.000004 |
| 16               | 6                | 0              | 1.706944                | -0.572079 | 0.000001  |
| 17               | 6                | 0              | 3.055870                | -0.877991 | 0.000001  |
| 18               | 6                | 0              | 3.611177                | 1.461981  | -0.000003 |
| 19               | 7                | 0              | 5.434286                | -0.152916 | 0.000000  |
| 20               | 6                | 0              | 5.882168                | -0.838055 | 1.213711  |
| 21               | 6                | 0              | 5.882168                | -0.838060 | -1.213708 |
| 22               | 1                | 0              | -5.416957               | 1.795527  | -0.000003 |
| 23               | 1                | 0              | -3.739918               | -2.907088 | 0.000005  |
| 24               | 1                | 0              | -7.008093               | -0.117693 | 0.000001  |
| 25               | 1                | 0              | -6.182726               | -2.431756 | 0.000005  |
| 26               | 1                | 0              | -0.198017               | 2.291596  | -0.000004 |

|    |   |   |          |           |           |
|----|---|---|----------|-----------|-----------|
| 27 | 1 | 0 | 1.957412 | 2.813450  | -0.000005 |
| 28 | 1 | 0 | 0.970411 | -1.359641 | 0.000002  |
| 29 | 1 | 0 | 3.360609 | -1.915796 | 0.000003  |
| 30 | 1 | 0 | 4.359591 | 2.241882  | -0.000005 |
| 31 | 1 | 0 | 5.564493 | -0.277156 | 2.091325  |
| 32 | 1 | 0 | 5.500000 | -1.865471 | 1.300926  |
| 33 | 1 | 0 | 6.971400 | -0.882740 | 1.210955  |
| 34 | 1 | 0 | 5.564494 | -0.277164 | -2.091324 |
| 35 | 1 | 0 | 6.971400 | -0.882745 | -1.210952 |
| 36 | 1 | 0 | 5.500001 | -1.865476 | -1.300919 |

## TSD1

Standard orientation:

| Center Number | Atomic Number | Atomic Type | Coordinates (Angstroms) |           |           |
|---------------|---------------|-------------|-------------------------|-----------|-----------|
|               |               |             | X                       | Y         | Z         |
| 1             | 6             | 0           | 5.046240                | 0.924890  | 0.000006  |
| 2             | 6             | 0           | 4.243451                | -1.789756 | -0.000055 |
| 3             | 6             | 0           | 5.987394                | -0.099629 | -0.000019 |
| 4             | 6             | 0           | 3.704391                | 0.572344  | -0.000001 |
| 5             | 6             | 0           | 3.308095                | -0.765274 | -0.000031 |
| 6             | 6             | 0           | 5.590406                | -1.441217 | -0.000049 |
| 7             | 6             | 0           | 1.820648                | -0.862017 | -0.000031 |
| 8             | 6             | 0           | 1.309190                | 0.531585  | 0.000003  |
| 9             | 6             | 0           | 2.497880                | 1.437000  | 0.000021  |
| 10            | 8             | 0           | 2.485833                | 2.655532  | 0.000050  |
| 11            | 8             | 0           | 1.199371                | -1.912600 | -0.000056 |
| 12            | 6             | 0           | 0.069114                | 1.084078  | 0.000021  |
| 13            | 6             | 0           | -1.280696               | 0.568487  | 0.000014  |
| 14            | 6             | 0           | -3.988741               | -0.222028 | 0.000010  |
| 15            | 6             | 0           | -2.320884               | 1.519874  | 0.000051  |
| 16            | 6             | 0           | -1.634162               | -0.793004 | -0.000025 |
| 17            | 6             | 0           | -2.965937               | -1.171596 | -0.000028 |
| 18            | 6             | 0           | -3.648480               | 1.134555  | 0.000049  |
| 19            | 7             | 0           | -5.351957               | -0.674046 | 0.000007  |
| 20            | 6             | 0           | -6.080613               | -0.301838 | 1.213791  |
| 21            | 6             | 0           | -6.080627               | -0.301776 | -1.213748 |
| 22            | 1             | 0           | 5.347848                | 1.962930  | 0.000029  |
| 23            | 1             | 0           | 3.931971                | -2.824871 | -0.000078 |
| 24            | 1             | 0           | 7.041770                | 0.140051  | -0.000014 |
| 25            | 1             | 0           | 6.344842                | -2.215844 | -0.000067 |
| 26            | 1             | 0           | 0.108935                | 2.170923  | 0.000049  |
| 27            | 1             | 0           | -2.071388               | 2.573002  | 0.000081  |
| 28            | 1             | 0           | -0.856342               | -1.539669 | -0.000053 |
| 29            | 1             | 0           | -3.235187               | -2.218773 | -0.000058 |
| 30            | 1             | 0           | -4.423291               | 1.888808  | 0.000078  |
| 31            | 1             | 0           | -5.527376               | -0.633301 | 2.091171  |
| 32            | 1             | 0           | -6.256827               | 0.780086  | 1.302560  |
| 33            | 1             | 0           | -7.049328               | -0.801785 | 1.210026  |
| 34            | 1             | 0           | -5.527402               | -0.633195 | -2.091153 |
| 35            | 1             | 0           | -7.049344               | -0.801721 | -1.209997 |
| 36            | 1             | 0           | -6.256840               | 0.780153  | -1.302460 |

## TSDA

Standard orientation:

| Center Number | Atomic Number | Atomic Type | Coordinates (Angstroms) |   |   |
|---------------|---------------|-------------|-------------------------|---|---|
|               |               |             | X                       | Y | Z |



|    |   |   |           |           |           |
|----|---|---|-----------|-----------|-----------|
| 1  | 6 | 0 | 5.042074  | -0.515858 | -0.093822 |
| 2  | 6 | 0 | 3.751583  | 2.001013  | 0.041037  |
| 3  | 6 | 0 | 5.776036  | 0.663993  | -0.068074 |
| 4  | 6 | 0 | 3.657306  | -0.421288 | -0.051316 |
| 5  | 6 | 0 | 3.019611  | 0.821588  | 0.015356  |
| 6  | 6 | 0 | 5.137788  | 1.908426  | -0.001390 |
| 7  | 6 | 0 | 1.542771  | 0.640282  | 0.048756  |
| 8  | 6 | 0 | 1.306467  | -0.834588 | -0.001973 |
| 9  | 6 | 0 | 2.642933  | -1.504562 | -0.065826 |
| 10 | 8 | 0 | 2.855095  | -2.700682 | -0.119167 |
| 11 | 8 | 0 | 0.713845  | 1.527000  | 0.104981  |
| 12 | 6 | 0 | 0.152195  | -1.509549 | 0.002957  |
| 13 | 6 | 0 | -1.215633 | -0.948137 | 0.064147  |
| 14 | 6 | 0 | -3.847068 | 0.033314  | 0.176900  |
| 15 | 6 | 0 | -1.846865 | -0.749733 | 1.291856  |
| 16 | 6 | 0 | -1.917556 | -0.663160 | -1.108592 |
| 17 | 6 | 0 | -3.216233 | -0.174716 | -1.050959 |
| 18 | 6 | 0 | -3.147179 | -0.260843 | 1.343409  |
| 19 | 7 | 0 | -5.191327 | 0.538348  | 0.280133  |
| 20 | 6 | 0 | -6.193150 | -0.364015 | -0.285430 |
| 21 | 6 | 0 | -5.336169 | 1.902388  | -0.226650 |
| 22 | 1 | 0 | 5.530243  | -1.478831 | -0.145427 |
| 23 | 1 | 0 | 3.254979  | 2.959724  | 0.092446  |
| 24 | 1 | 0 | 6.856073  | 0.625110  | -0.099871 |
| 25 | 1 | 0 | 5.736439  | 2.808607  | 0.017114  |
| 26 | 1 | 0 | 0.233739  | -2.593832 | -0.043432 |
| 27 | 1 | 0 | -1.320208 | -0.970659 | 2.210413  |
| 28 | 1 | 0 | -1.444434 | -0.817023 | -2.069249 |
| 29 | 1 | 0 | -3.737670 | 0.046057  | -1.972737 |
| 30 | 1 | 0 | -3.632159 | -0.101110 | 2.296712  |
| 31 | 1 | 0 | -6.081122 | -1.356605 | 0.148414  |
| 32 | 1 | 0 | -7.187664 | 0.008502  | -0.037660 |
| 33 | 1 | 0 | -6.129668 | -0.455904 | -1.380115 |
| 34 | 1 | 0 | -6.332495 | 2.269901  | 0.021312  |
| 35 | 1 | 0 | -4.602644 | 2.551409  | 0.249249  |
| 36 | 1 | 0 | -5.209100 | 1.978347  | -1.316924 |

## 2, 298 K, dichloromethane, B3LYP/aug-cc-pVDZ

### GS

Standard orientation:

| Center Number | Atomic Number | Atomic Type | Coordinates (Angstroms) |           |           |
|---------------|---------------|-------------|-------------------------|-----------|-----------|
|               |               |             | X                       | Y         | Z         |
| 1             | 6             | 0           | 4.696023                | -0.405126 | -0.236178 |
| 2             | 6             | 0           | 3.361632                | -2.900824 | -0.023084 |
| 3             | 6             | 0           | 5.404685                | -1.613395 | -0.282159 |
| 4             | 6             | 0           | 3.303361                | -0.450391 | -0.088253 |
| 5             | 6             | 0           | 2.661834                | -1.699224 | 0.010948  |
| 6             | 6             | 0           | 4.752521                | -2.849819 | -0.173852 |
| 7             | 6             | 0           | 1.194936                | -1.499424 | 0.141129  |
| 8             | 6             | 0           | 0.958004                | -0.032624 | 0.058264  |
| 9             | 6             | 0           | 2.270130                | 0.613971  | 0.009479  |
| 10            | 6             | 0           | 2.556672                | 1.971097  | 0.114200  |
| 11            | 8             | 0           | 0.381236                | -2.411204 | 0.265171  |
| 12            | 6             | 0           | -0.240928               | 0.653068  | -0.115053 |
| 13            | 6             | 0           | -1.625165               | 0.309392  | -0.084887 |
| 14            | 6             | 0           | -4.469420               | -0.104163 | -0.060058 |

|    |   |   |           |           |           |
|----|---|---|-----------|-----------|-----------|
| 15 | 6 | 0 | -2.193975 | -0.939155 | 0.302290  |
| 16 | 6 | 0 | -2.545359 | 1.340975  | -0.443678 |
| 17 | 6 | 0 | -3.909846 | 1.153972  | -0.441321 |
| 18 | 6 | 0 | -3.557886 | -1.139128 | 0.317832  |
| 19 | 7 | 0 | -5.811308 | -0.306502 | -0.051582 |
| 20 | 6 | 0 | -6.366948 | -1.598348 | 0.348152  |
| 21 | 6 | 0 | -6.726352 | 0.768281  | -0.431669 |
| 22 | 6 | 0 | 1.592772  | 2.988615  | 0.397840  |
| 23 | 6 | 0 | 3.875428  | 2.510760  | 0.005422  |
| 24 | 7 | 0 | 0.870167  | 3.867019  | 0.653637  |
| 25 | 7 | 0 | 4.923106  | 3.014227  | -0.081619 |
| 26 | 1 | 0 | 5.240225  | 0.529361  | -0.324138 |
| 27 | 1 | 0 | 2.833072  | -3.849492 | 0.062853  |
| 28 | 1 | 0 | 6.487206  | -1.587094 | -0.404735 |
| 29 | 1 | 0 | 5.332823  | -3.771727 | -0.208490 |
| 30 | 1 | 0 | -0.108775 | 1.706118  | -0.358459 |
| 31 | 1 | 0 | -1.532018 | -1.751076 | 0.585550  |
| 32 | 1 | 0 | -2.153718 | 2.317043  | -0.732047 |
| 33 | 1 | 0 | -4.553754 | 1.979809  | -0.728589 |
| 34 | 1 | 0 | -3.935085 | -2.109177 | 0.628719  |
| 35 | 1 | 0 | -6.010176 | -2.404861 | -0.308177 |
| 36 | 1 | 0 | -7.455449 | -1.552233 | 0.275141  |
| 37 | 1 | 0 | -6.099485 | -1.843940 | 1.386065  |
| 38 | 1 | 0 | -6.624999 | 1.634015  | 0.238773  |
| 39 | 1 | 0 | -6.544245 | 1.099013  | -1.464266 |
| 40 | 1 | 0 | -7.751978 | 0.399615  | -0.364820 |

## TSA1

Standard orientation:

| Center Number | Atomic Number | Atomic Type | Coordinates (Angstroms) |           |           |
|---------------|---------------|-------------|-------------------------|-----------|-----------|
|               |               |             | X                       | Y         | Z         |
| 1             | 6             | 0           | 4.503958                | -0.937899 | -0.000007 |
| 2             | 6             | 0           | 2.647383                | -3.087450 | 0.000011  |
| 3             | 6             | 0           | 4.934120                | -2.267449 | -0.000004 |
| 4             | 6             | 0           | 3.123257                | -0.677260 | -0.000001 |
| 5             | 6             | 0           | 2.219573                | -1.761338 | 0.000007  |
| 6             | 6             | 0           | 4.021523                | -3.336112 | 0.000005  |
| 7             | 6             | 0           | 0.827075                | -1.258796 | 0.000011  |
| 8             | 6             | 0           | 0.922594                | 0.246638  | 0.000001  |
| 9             | 6             | 0           | 2.365598                | 0.593320  | -0.000002 |
| 10            | 6             | 0           | 2.921178                | 1.855953  | -0.000002 |
| 11            | 8             | 0           | -0.185713               | -1.938285 | 0.000019  |
| 12            | 6             | 0           | -0.139877               | 1.086283  | -0.000008 |
| 13            | 6             | 0           | -1.573908               | 0.702168  | -0.000006 |
| 14            | 6             | 0           | -4.370383               | 0.107441  | -0.000003 |
| 15            | 6             | 0           | -2.282536               | 0.554412  | 1.201003  |
| 16            | 6             | 0           | -2.282533               | 0.554386  | -1.201013 |
| 17            | 6             | 0           | -3.644271               | 0.255659  | -1.208233 |
| 18            | 6             | 0           | -3.644274               | 0.255685  | 1.208226  |
| 19            | 7             | 0           | -5.732040               | -0.149227 | -0.000002 |
| 20            | 6             | 0           | -6.386081               | -0.522807 | -1.246266 |
| 21            | 6             | 0           | -6.386086               | -0.522774 | 1.246268  |
| 22            | 6             | 0           | 2.167263                | 3.073212  | 0.000000  |
| 23            | 6             | 0           | 4.331854                | 2.102631  | -0.000004 |
| 24            | 7             | 0           | 1.618592                | 4.100200  | 0.000002  |
| 25            | 7             | 0           | 5.465463                | 2.367162  | -0.000005 |
| 26            | 1             | 0           | 5.243252                | -0.143953 | -0.000014 |
| 27            | 1             | 0           | 1.921328                | -3.899299 | 0.000017  |
| 28            | 1             | 0           | 6.003260                | -2.477609 | -0.000009 |

|    |   |   |           |           |           |
|----|---|---|-----------|-----------|-----------|
| 29 | 1 | 0 | 4.392151  | -4.360875 | 0.000007  |
| 30 | 1 | 0 | 0.050745  | 2.159737  | -0.000018 |
| 31 | 1 | 0 | -1.763562 | 0.662971  | 2.153774  |
| 32 | 1 | 0 | -1.763556 | 0.662925  | -2.153786 |
| 33 | 1 | 0 | -4.138338 | 0.138649  | -2.168796 |
| 34 | 1 | 0 | -4.138344 | 0.138696  | 2.168790  |
| 35 | 1 | 0 | -5.983674 | -1.459192 | -1.673058 |
| 36 | 1 | 0 | -6.280382 | 0.270557  | -1.998654 |
| 37 | 1 | 0 | -7.454889 | -0.660086 | -1.058478 |
| 38 | 1 | 0 | -5.983687 | -1.459151 | 1.673083  |
| 39 | 1 | 0 | -6.280384 | 0.270607  | 1.998638  |
| 40 | 1 | 0 | -7.454894 | -0.660051 | 1.058481  |

## TSA2

Standard orientation:

| Center<br>Number | Atomic<br>Number | Atomic<br>Type | Coordinates (Angstroms) |           |           |
|------------------|------------------|----------------|-------------------------|-----------|-----------|
|                  |                  |                | X                       | Y         | Z         |
| 1                | 6                | 0              | 4.525271                | -0.888074 | 0.078810  |
| 2                | 6                | 0              | 2.711440                | -3.067143 | -0.094109 |
| 3                | 6                | 0              | 4.979378                | -2.209502 | 0.058712  |
| 4                | 6                | 0              | 3.142026                | -0.650946 | 0.013039  |
| 5                | 6                | 0              | 2.259541                | -1.749305 | -0.070115 |
| 6                | 6                | 0              | 4.088063                | -3.292497 | -0.028154 |
| 7                | 6                | 0              | 0.859406                | -1.270377 | -0.119040 |
| 8                | 6                | 0              | 0.926183                | 0.233722  | -0.025462 |
| 9                | 6                | 0              | 2.362082                | 0.605868  | 0.011299  |
| 10               | 6                | 0              | 2.893863                | 1.878605  | 0.018344  |
| 11               | 8                | 0              | -0.138824               | -1.964536 | -0.214400 |
| 12               | 6                | 0              | -0.151483               | 1.049617  | 0.055129  |
| 13               | 6                | 0              | -1.577169               | 0.636221  | 0.039179  |
| 14               | 6                | 0              | -4.356275               | -0.034527 | 0.020764  |
| 15               | 6                | 0              | -2.264854               | 0.367736  | 1.231478  |
| 16               | 6                | 0              | -2.303608               | 0.593633  | -1.159607 |
| 17               | 6                | 0              | -3.659053               | 0.268111  | -1.175762 |
| 18               | 6                | 0              | -3.620118               | 0.040468  | 1.229857  |
| 19               | 7                | 0              | -5.692584               | -0.398919 | 0.007714  |
| 20               | 6                | 0              | -6.423716               | -0.473582 | 1.264530  |
| 21               | 6                | 0              | -6.462947               | -0.241344 | -1.217667 |
| 22               | 6                | 0              | 2.116497                | 3.080488  | -0.018129 |
| 23               | 6                | 0              | 4.299389                | 2.151341  | 0.050014  |
| 24               | 7                | 0              | 1.547138                | 4.095638  | -0.050040 |
| 25               | 7                | 0              | 5.427830                | 2.435854  | 0.076668  |
| 26               | 1                | 0              | 5.248316                | -0.082085 | 0.147349  |
| 27               | 1                | 0              | 2.001680                | -3.890593 | -0.160641 |
| 28               | 1                | 0              | 6.050553                | -2.401823 | 0.111836  |
| 29               | 1                | 0              | 4.477120                | -4.310294 | -0.042804 |
| 30               | 1                | 0              | 0.019171                | 2.122423  | 0.149642  |
| 31               | 1                | 0              | -1.736351               | 0.411845  | 2.184240  |
| 32               | 1                | 0              | -1.805750               | 0.816812  | -2.103704 |
| 33               | 1                | 0              | -4.170868               | 0.251565  | -2.134081 |
| 34               | 1                | 0              | -4.100935               | -0.157352 | 2.183937  |
| 35               | 1                | 0              | -6.465015               | 0.497488  | 1.790151  |
| 36               | 1                | 0              | -5.969107               | -1.210630 | 1.940475  |
| 37               | 1                | 0              | -7.447763               | -0.799075 | 1.060202  |
| 38               | 1                | 0              | -6.519916               | 0.810465  | -1.551489 |
| 39               | 1                | 0              | -6.030388               | -0.837102 | -2.032979 |
| 40               | 1                | 0              | -7.480339               | -0.604446 | -1.046000 |

## TSD1

Standard orientation:

| Center<br>Number | Atomic<br>Number | Atomic<br>Type | Coordinates (Angstroms) |           |           |
|------------------|------------------|----------------|-------------------------|-----------|-----------|
|                  |                  |                | X                       | Y         | Z         |
| 1                | 6                | 0              | -4.633869               | -0.554474 | 0.305769  |
| 2                | 6                | 0              | -3.181875               | -2.964720 | -0.085098 |
| 3                | 6                | 0              | -5.273256               | -1.798868 | 0.330525  |
| 4                | 6                | 0              | -3.248599               | -0.518393 | 0.088706  |
| 5                | 6                | 0              | -2.546301               | -1.725931 | -0.097211 |
| 6                | 6                | 0              | -4.562497               | -2.993592 | 0.133486  |
| 7                | 6                | 0              | -1.101536               | -1.448840 | -0.287821 |
| 8                | 6                | 0              | -0.932948               | 0.030981  | -0.107264 |
| 9                | 6                | 0              | -2.289225               | 0.604110  | -0.008471 |
| 10               | 6                | 0              | -2.633264               | 1.941286  | -0.090713 |
| 11               | 8                | 0              | -0.248415               | -2.296089 | -0.514616 |
| 12               | 6                | 0              | 0.210434                | 0.744320  | 0.157849  |
| 13               | 6                | 0              | 1.628531                | 0.436833  | 0.138059  |
| 14               | 6                | 0              | 4.442709                | 0.085568  | 0.181241  |
| 15               | 6                | 0              | 2.229798                | -0.677021 | -0.496450 |
| 16               | 6                | 0              | 2.479634                | 1.377429  | 0.770959  |
| 17               | 6                | 0              | 3.858485                | 1.197716  | 0.803899  |
| 18               | 6                | 0              | 3.610866                | -0.840955 | -0.474690 |
| 19               | 7                | 0              | 5.874218                | -0.059703 | 0.227702  |
| 20               | 6                | 0              | 6.499210                | 0.020948  | -1.097386 |
| 21               | 6                | 0              | 6.301172                | -1.255211 | 0.963531  |
| 22               | 6                | 0              | -1.707459               | 2.997616  | -0.368611 |
| 23               | 6                | 0              | -3.976624               | 2.417842  | 0.034206  |
| 24               | 7                | 0              | -1.014332               | 3.900142  | -0.617075 |
| 25               | 7                | 0              | -5.048229               | 2.862368  | 0.135005  |
| 26               | 1                | 0              | -5.218981               | 0.345574  | 0.464726  |
| 27               | 1                | 0              | -2.610454               | -3.879115 | -0.238905 |
| 28               | 1                | 0              | -6.347797               | -1.838458 | 0.506951  |
| 29               | 1                | 0              | -5.092393               | -3.945619 | 0.153240  |
| 30               | 1                | 0              | 0.034921                | 1.764060  | 0.498765  |
| 31               | 1                | 0              | 1.605481                | -1.406829 | -1.000110 |
| 32               | 1                | 0              | 2.044016                | 2.256986  | 1.245395  |
| 33               | 1                | 0              | 4.502184                | 1.921044  | 1.302379  |
| 34               | 1                | 0              | 4.049767                | -1.702406 | -0.977194 |
| 35               | 1                | 0              | 6.259653                | -0.841996 | -1.749051 |
| 36               | 1                | 0              | 7.589143                | 0.060176  | -0.971065 |
| 37               | 1                | 0              | 6.176235                | 0.939511  | -1.601671 |
| 38               | 1                | 0              | 7.391069                | -1.219707 | 1.091284  |
| 39               | 1                | 0              | 5.836591                | -1.261831 | 1.956808  |
| 40               | 1                | 0              | 6.045958                | -2.202192 | 0.448847  |

## TSD2

Standard orientation:

| Center<br>Number | Atomic<br>Number | Atomic<br>Type | Coordinates (Angstroms) |           |           |
|------------------|------------------|----------------|-------------------------|-----------|-----------|
|                  |                  |                | X                       | Y         | Z         |
| 1                | 6                | 0              | -4.667524               | -0.392105 | 0.370975  |
| 2                | 6                | 0              | -3.366675               | -2.878741 | -0.070479 |
| 3                | 6                | 0              | -5.375855               | -1.598239 | 0.408197  |
| 4                | 6                | 0              | -3.288921               | -0.433529 | 0.115601  |
| 5                | 6                | 0              | -2.662155               | -1.677996 | -0.095014 |
| 6                | 6                | 0              | -4.740131               | -2.830326 | 0.186394  |
| 7                | 6                | 0              | -1.209912               | -1.482347 | -0.325329 |

|    |   |   |           |           |           |
|----|---|---|-----------|-----------|-----------|
| 8  | 6 | 0 | -0.951810 | -0.015891 | -0.142508 |
| 9  | 6 | 0 | -2.270012 | 0.633122  | -0.003459 |
| 10 | 6 | 0 | -2.539942 | 1.988162  | -0.069543 |
| 11 | 8 | 0 | -0.413663 | -2.375174 | -0.582014 |
| 12 | 6 | 0 | 0.237665  | 0.630131  | 0.090757  |
| 13 | 6 | 0 | 1.635178  | 0.243366  | 0.031437  |
| 14 | 6 | 0 | 4.425955  | -0.262990 | -0.005660 |
| 15 | 6 | 0 | 2.155391  | -0.904767 | -0.610758 |
| 16 | 6 | 0 | 2.555702  | 1.140305  | 0.632928  |
| 17 | 6 | 0 | 3.921764  | 0.887311  | 0.627624  |
| 18 | 6 | 0 | 3.527208  | -1.143036 | -0.627002 |
| 19 | 7 | 0 | 5.832621  | -0.565942 | -0.048823 |
| 20 | 6 | 0 | 6.400730  | -0.820034 | 1.279835  |
| 21 | 6 | 0 | 6.608840  | 0.430257  | -0.795737 |
| 22 | 6 | 0 | -1.563980 | 2.993027  | -0.366036 |
| 23 | 6 | 0 | -3.850425 | 2.538839  | 0.094143  |
| 24 | 7 | 0 | -0.828162 | 3.857397  | -0.627132 |
| 25 | 7 | 0 | -4.891956 | 3.042697  | 0.226262  |
| 26 | 1 | 0 | -5.195921 | 0.538748  | 0.549894  |
| 27 | 1 | 0 | -2.852769 | -3.823261 | -0.244008 |
| 28 | 1 | 0 | -6.445654 | -1.577637 | 0.614213  |
| 29 | 1 | 0 | -5.322848 | -3.750686 | 0.216825  |
| 30 | 1 | 0 | 0.130028  | 1.657525  | 0.436527  |
| 31 | 1 | 0 | 1.478648  | -1.603378 | -1.090162 |
| 32 | 1 | 0 | 2.181483  | 2.044989  | 1.112870  |
| 33 | 1 | 0 | 4.600178  | 1.591679  | 1.107319  |
| 34 | 1 | 0 | 3.925496  | -2.024147 | -1.128777 |
| 35 | 1 | 0 | 6.436600  | 0.081878  | 1.921920  |
| 36 | 1 | 0 | 7.426187  | -1.193202 | 1.159142  |
| 37 | 1 | 0 | 5.810686  | -1.589626 | 1.791698  |
| 38 | 1 | 0 | 7.634295  | 0.057803  | -0.918707 |
| 39 | 1 | 0 | 6.169578  | 0.568990  | -1.790809 |
| 40 | 1 | 0 | 6.659240  | 1.415530  | -0.292177 |

## TSDA

Standard orientation:

| Center Number | Atomic Number | Atomic Type | Coordinates (Angstroms) |           |           |
|---------------|---------------|-------------|-------------------------|-----------|-----------|
|               |               |             | X                       | Y         | Z         |
| 1             | 6             | 0           | -4.506935               | -0.892100 | -0.036798 |
| 2             | 6             | 0           | -2.678900               | -3.066363 | -0.001586 |
| 3             | 6             | 0           | -4.954385               | -2.215866 | -0.039709 |
| 4             | 6             | 0           | -3.123176               | -0.649785 | -0.015555 |
| 5             | 6             | 0           | -2.233633               | -1.745950 | 0.002223  |
| 6             | 6             | 0           | -4.056041               | -3.296502 | -0.022713 |
| 7             | 6             | 0           | -0.835962               | -1.261282 | 0.024965  |
| 8             | 6             | 0           | -0.912572               | 0.245436  | 0.027127  |
| 9             | 6             | 0           | -2.350512               | 0.611150  | -0.008494 |
| 10            | 6             | 0           | -2.886874               | 1.881202  | -0.036168 |
| 11            | 8             | 0           | 0.171312                | -1.948639 | 0.039888  |
| 12            | 6             | 0           | 0.161875                | 1.066249  | 0.066674  |
| 13            | 6             | 0           | 1.589316                | 0.653187  | 0.106084  |
| 14            | 6             | 0           | 4.337710                | 0.013242  | 0.181061  |
| 15            | 6             | 0           | 2.319188                | 0.510932  | -1.084156 |
| 16            | 6             | 0           | 2.248067                | 0.489529  | 1.332757  |
| 17            | 6             | 0           | 3.608194                | 0.167819  | 1.365212  |
| 18            | 6             | 0           | 3.677727                | 0.189954  | -1.044991 |
| 19            | 7             | 0           | 5.740383                | -0.317120 | 0.265445  |
| 20            | 6             | 0           | 6.610665                | 0.733227  | -0.269865 |
| 21            | 6             | 0           | 6.055658                | -1.630108 | -0.303947 |

|    |   |   |           |           |           |
|----|---|---|-----------|-----------|-----------|
| 22 | 6 | 0 | -2.111282 | 3.084665  | -0.039230 |
| 23 | 6 | 0 | -4.293369 | 2.148926  | -0.068159 |
| 24 | 7 | 0 | -1.538383 | 4.098220  | -0.044594 |
| 25 | 7 | 0 | -5.422743 | 2.429381  | -0.094076 |
| 26 | 1 | 0 | -5.235405 | -0.088270 | -0.050181 |
| 27 | 1 | 0 | -1.964005 | -3.887891 | 0.012069  |
| 28 | 1 | 0 | -6.026026 | -2.412076 | -0.055506 |
| 29 | 1 | 0 | -4.440242 | -4.316199 | -0.025890 |
| 30 | 1 | 0 | -0.000476 | 2.143757  | 0.072627  |
| 31 | 1 | 0 | 1.822639  | 0.645050  | -2.045230 |
| 32 | 1 | 0 | 1.697984  | 0.606649  | 2.266353  |
| 33 | 1 | 0 | 4.118709  | 0.032927  | 2.318345  |
| 34 | 1 | 0 | 4.223512  | 0.077625  | -1.981625 |
| 35 | 1 | 0 | 6.529899  | 0.853281  | -1.368761 |
| 36 | 1 | 0 | 7.654447  | 0.487466  | -0.032117 |
| 37 | 1 | 0 | 6.364675  | 1.691785  | 0.202740  |
| 38 | 1 | 0 | 7.097873  | -1.881707 | -0.065252 |
| 39 | 1 | 0 | 5.404557  | -2.391015 | 0.142830  |
| 40 | 1 | 0 | 5.938014  | -1.671008 | -1.405313 |

### 3, 298 K, dichloromethane, B3LYP/aug-cc-pVDZ

#### GS

Standard orientation:

| Center<br>Number | Atomic<br>Number | Atomic<br>Type | Coordinates (Angstroms) |           |           |
|------------------|------------------|----------------|-------------------------|-----------|-----------|
|                  |                  |                | X                       | Y         | Z         |
| 1                | 6                | 0              | -4.410382               | -0.095977 | -1.088047 |
| 2                | 6                | 0              | -3.041712               | -2.540932 | -0.662100 |
| 3                | 6                | 0              | -4.975288               | -1.314041 | -1.485093 |
| 4                | 6                | 0              | -3.145375               | -0.101405 | -0.492055 |
| 5                | 6                | 0              | -2.463989               | -1.328247 | -0.278215 |
| 6                | 6                | 0              | -4.298653               | -2.521492 | -1.278211 |
| 7                | 6                | 0              | -1.176762               | -1.031641 | 0.371937  |
| 8                | 6                | 0              | -0.976133               | 0.415390  | 0.286202  |
| 9                | 6                | 0              | -2.290249               | 1.002355  | -0.008818 |
| 10               | 6                | 0              | -2.697659               | 2.318402  | 0.158773  |
| 11               | 6                | 0              | -0.433274               | -1.920919 | 1.131177  |
| 12               | 6                | 0              | 0.203312                | 1.155413  | 0.274022  |
| 13               | 6                | 0              | 1.559076                | 0.797216  | 0.019560  |
| 14               | 6                | 0              | 4.330125                | 0.299347  | -0.535424 |
| 15               | 6                | 0              | 1.995226                | -0.429320 | -0.557757 |
| 16               | 6                | 0              | 2.563961                | 1.777935  | 0.262737  |
| 17               | 6                | 0              | 3.899392                | 1.543687  | 0.018826  |
| 18               | 6                | 0              | 3.320491                | -0.669444 | -0.839723 |
| 19               | 7                | 0              | 5.639550                | 0.050598  | -0.782107 |
| 20               | 6                | 0              | 6.655983                | 1.055775  | -0.474323 |
| 21               | 6                | 0              | 6.059555                | -1.220131 | -1.371990 |
| 22               | 6                | 0              | -1.892143               | 3.334348  | 0.759558  |
| 23               | 6                | 0              | -3.999500               | 2.792111  | -0.190558 |
| 24               | 7                | 0              | -1.281017               | 4.193901  | 1.255239  |
| 25               | 7                | 0              | -5.043191               | 3.235509  | -0.459050 |
| 26               | 6                | 0              | 0.613631                | -1.503344 | 2.008732  |
| 27               | 7                | 0              | 1.442197                | -1.203974 | 2.770173  |
| 28               | 6                | 0              | -0.718124               | -3.318627 | 1.207179  |
| 29               | 7                | 0              | -0.905458               | -4.465579 | 1.290766  |
| 30               | 1                | 0              | -4.957390               | 0.824867  | -1.262310 |
| 31               | 1                | 0              | -2.531463               | -3.487935 | -0.513686 |
| 32               | 1                | 0              | -5.953151               | -1.317490 | -1.965366 |

|    |   |   |           |           |           |
|----|---|---|-----------|-----------|-----------|
| 33 | 1 | 0 | -4.751342 | -3.458114 | -1.602152 |
| 34 | 1 | 0 | 0.072679  | 2.230273  | 0.388662  |
| 35 | 1 | 0 | 1.268006  | -1.190709 | -0.829438 |
| 36 | 1 | 0 | 2.266570  | 2.744970  | 0.669412  |
| 37 | 1 | 0 | 4.618739  | 2.325662  | 0.242345  |
| 38 | 1 | 0 | 3.591112  | -1.612166 | -1.305893 |
| 39 | 1 | 0 | 7.639560  | 0.650566  | -0.720002 |
| 40 | 1 | 0 | 6.644907  | 1.314171  | 0.593855  |
| 41 | 1 | 0 | 5.616775  | -1.362382 | -2.368338 |
| 42 | 1 | 0 | 7.146398  | -1.218524 | -1.475931 |
| 43 | 1 | 0 | 6.500938  | 1.972414  | -1.061684 |
| 44 | 1 | 0 | 5.774024  | -2.067531 | -0.732960 |

## TSA2

Standard orientation:

| Center<br>Number | Atomic<br>Number | Atomic<br>Type | Coordinates (Angstroms) |           |           |
|------------------|------------------|----------------|-------------------------|-----------|-----------|
|                  |                  |                | X                       | Y         | Z         |
| 1                | 6                | 0              | 4.368641                | 0.248976  | -1.143297 |
| 2                | 6                | 0              | 2.811810                | 2.595682  | -0.783047 |
| 3                | 6                | 0              | 4.822319                | 1.488023  | -1.602779 |
| 4                | 6                | 0              | 3.119039                | 0.181874  | -0.516063 |
| 5                | 6                | 0              | 2.342533                | 1.359565  | -0.325502 |
| 6                | 6                | 0              | 4.050485                | 2.645689  | -1.429249 |
| 7                | 6                | 0              | 1.117294                | 1.001971  | 0.408264  |
| 8                | 6                | 0              | 0.999987                | -0.471825 | 0.287716  |
| 9                | 6                | 0              | 2.375303                | -0.963405 | 0.016363  |
| 10               | 6                | 0              | 2.836007                | -2.233219 | 0.270984  |
| 11               | 6                | 0              | 0.350885                | 1.848604  | 1.171398  |
| 12               | 6                | 0              | -0.090018               | -1.222796 | -0.019838 |
| 13               | 6                | 0              | -1.516185               | -0.853466 | -0.153979 |
| 14               | 6                | 0              | -4.304797               | -0.351112 | -0.558195 |
| 15               | 6                | 0              | -2.048800               | -0.682261 | -1.447046 |
| 16               | 6                | 0              | -2.412405               | -0.820916 | 0.925172  |
| 17               | 6                | 0              | -3.771564               | -0.585234 | 0.735198  |
| 18               | 6                | 0              | -3.399067               | -0.420228 | -1.650756 |
| 19               | 7                | 0              | -5.639650               | -0.071947 | -0.748418 |
| 20               | 6                | 0              | -6.565286               | -0.161343 | 0.372344  |
| 21               | 6                | 0              | -6.181288               | 0.002278  | -2.098135 |
| 22               | 6                | 0              | 2.040427                | -3.232755 | 0.920926  |
| 23               | 6                | 0              | 4.167341                | -2.658638 | -0.038125 |
| 24               | 7                | 0              | 1.443325                | -4.072789 | 1.461614  |
| 25               | 7                | 0              | 5.240746                | -3.039341 | -0.277343 |
| 26               | 6                | 0              | -0.557471               | 1.415299  | 2.189051  |
| 27               | 7                | 0              | -1.228082               | 1.160933  | 3.104976  |
| 28               | 6                | 0              | 0.524087                | 3.271777  | 1.154826  |
| 29               | 7                | 0              | 0.618838                | 4.431442  | 1.161493  |
| 30               | 1                | 0              | 4.977742                | -0.637287 | -1.294308 |
| 31               | 1                | 0              | 2.231654                | 3.505651  | -0.664441 |
| 32               | 1                | 0              | 5.785419                | 1.552259  | -2.107677 |
| 33               | 1                | 0              | 4.418840                | 3.599908  | -1.804334 |
| 34               | 1                | 0              | 0.138572                | -2.238244 | -0.354441 |
| 35               | 1                | 0              | -1.391241               | -0.743791 | -2.315028 |
| 36               | 1                | 0              | -2.052487               | -1.005546 | 1.934146  |
| 37               | 1                | 0              | -4.418825               | -0.588080 | 1.607630  |
| 38               | 1                | 0              | -3.748633               | -0.277846 | -2.669553 |
| 39               | 1                | 0              | -7.563281               | 0.128049  | 0.032429  |
| 40               | 1                | 0              | -6.273281               | 0.523436  | 1.181068  |
| 41               | 1                | 0              | -6.089638               | -0.954961 | -2.639770 |
| 42               | 1                | 0              | -7.240959               | 0.265043  | -2.041197 |

|    |   |   |           |           |           |
|----|---|---|-----------|-----------|-----------|
| 43 | 1 | 0 | -6.622166 | -1.182281 | 0.787685  |
| 44 | 1 | 0 | -5.673634 | 0.780360  | -2.685868 |

## TSA1

Standard orientation:

| Center<br>Number | Atomic<br>Number | Atomic<br>Type | Coordinates (Angstroms) |           |           |
|------------------|------------------|----------------|-------------------------|-----------|-----------|
|                  |                  |                | X                       | Y         | Z         |
| 1                | 6                | 0              | 4.350823                | 0.328217  | -1.151082 |
| 2                | 6                | 0              | 2.791546                | 2.655974  | -0.694104 |
| 3                | 6                | 0              | 4.804924                | 1.587834  | -1.552364 |
| 4                | 6                | 0              | 3.099869                | 0.230587  | -0.530609 |
| 5                | 6                | 0              | 2.321846                | 1.398607  | -0.301550 |
| 6                | 6                | 0              | 4.033979                | 2.737485  | -1.329481 |
| 7                | 6                | 0              | 1.078538                | 1.004097  | 0.372192  |
| 8                | 6                | 0              | 0.979377                | -0.464283 | 0.238314  |
| 9                | 6                | 0              | 2.357935                | -0.938337 | -0.033642 |
| 10               | 6                | 0              | 2.865705                | -2.200740 | 0.189352  |
| 11               | 6                | 0              | 0.291259                | 1.801216  | 1.172862  |
| 12               | 6                | 0              | -0.121379               | -1.267968 | 0.124596  |
| 13               | 6                | 0              | -1.530841               | -0.952730 | -0.063433 |
| 14               | 6                | 0              | -4.299120               | -0.526914 | -0.472442 |
| 15               | 6                | 0              | -1.996661               | 0.230722  | -0.677154 |
| 16               | 6                | 0              | -2.479211               | -1.932324 | 0.302106  |
| 17               | 6                | 0              | -3.842643               | -1.711186 | 0.121176  |
| 18               | 6                | 0              | -3.356346               | 0.434299  | -0.883703 |
| 19               | 7                | 0              | -5.715224               | -0.344995 | -0.654909 |
| 20               | 6                | 0              | -6.247917               | 0.783159  | 0.117362  |
| 21               | 6                | 0              | -6.107612               | -0.278193 | -2.066680 |
| 22               | 6                | 0              | 2.119185                | -3.257476 | 0.801382  |
| 23               | 6                | 0              | 4.215428                | -2.566728 | -0.112845 |
| 24               | 7                | 0              | 1.555364                | -4.142942 | 1.304733  |
| 25               | 7                | 0              | 5.303372                | -2.911332 | -0.342754 |
| 26               | 6                | 0              | -0.731274               | 1.279837  | 2.026776  |
| 27               | 7                | 0              | -1.539828               | 0.900053  | 2.772281  |
| 28               | 6                | 0              | 0.494921                | 3.211087  | 1.308657  |
| 29               | 7                | 0              | 0.622438                | 4.360656  | 1.439307  |
| 30               | 1                | 0              | 4.964236                | -0.547069 | -1.340872 |
| 31               | 1                | 0              | 2.206068                | 3.557240  | -0.537361 |
| 32               | 1                | 0              | 5.769730                | 1.674184  | -2.050707 |
| 33               | 1                | 0              | 4.404813                | 3.707533  | -1.658730 |
| 34               | 1                | 0              | 0.079230                | -2.337999 | 0.087052  |
| 35               | 1                | 0              | -1.290611               | 0.979763  | -1.029395 |
| 36               | 1                | 0              | -2.139633               | -2.867861 | 0.746965  |
| 37               | 1                | 0              | -4.571227               | -2.461711 | 0.424281  |
| 38               | 1                | 0              | -3.689288               | 1.347816  | -1.375019 |
| 39               | 1                | 0              | -5.901041               | 1.768939  | -0.250086 |
| 40               | 1                | 0              | -5.955423               | 0.680244  | 1.169015  |
| 41               | 1                | 0              | -5.714227               | -1.151733 | -2.600221 |
| 42               | 1                | 0              | -7.203528               | -0.298727 | -2.129620 |
| 43               | 1                | 0              | -7.344085               | 0.764393  | 0.058726  |
| 44               | 1                | 0              | -5.751857               | 0.637442  | -2.578762 |

## TSD2

Standard orientation:

| Center<br>Number | Atomic<br>Number | Atomic<br>Type | Coordinates (Angstroms) |   |   |
|------------------|------------------|----------------|-------------------------|---|---|
|                  |                  |                | X                       | Y | Z |



|    |   |   |           |           |           |
|----|---|---|-----------|-----------|-----------|
| 1  | 6 | 0 | -4.409790 | -0.095489 | -1.105376 |
| 2  | 6 | 0 | -2.996084 | -2.530873 | -0.744820 |
| 3  | 6 | 0 | -4.951689 | -1.311302 | -1.532110 |
| 4  | 6 | 0 | -3.143657 | -0.096383 | -0.508595 |
| 5  | 6 | 0 | -2.439076 | -1.318118 | -0.327128 |
| 6  | 6 | 0 | -4.252626 | -2.514008 | -1.357081 |
| 7  | 6 | 0 | -1.160227 | -1.023841 | 0.331003  |
| 8  | 6 | 0 | -0.967354 | 0.438129  | 0.231396  |
| 9  | 6 | 0 | -2.317226 | 1.007812  | 0.002728  |
| 10 | 6 | 0 | -2.736394 | 2.293865  | 0.270164  |
| 11 | 6 | 0 | -0.412674 | -1.890746 | 1.096207  |
| 12 | 6 | 0 | 0.181368  | 1.169913  | 0.110427  |
| 13 | 6 | 0 | 1.561353  | 0.763560  | -0.119354 |
| 14 | 6 | 0 | 4.282244  | 0.157444  | -0.609417 |
| 15 | 6 | 0 | 1.928480  | -0.428270 | -0.778831 |
| 16 | 6 | 0 | 2.585099  | 1.663181  | 0.253145  |
| 17 | 6 | 0 | 3.924145  | 1.354917  | 0.033415  |
| 18 | 6 | 0 | 3.267465  | -0.718641 | -1.024000 |
| 19 | 7 | 0 | 5.651787  | -0.197883 | -0.874542 |
| 20 | 6 | 0 | 6.317636  | 0.731627  | -1.793711 |
| 21 | 6 | 0 | 6.430531  | -0.409998 | 0.351000  |
| 22 | 6 | 0 | -1.909109 | 3.281712  | 0.893315  |
| 23 | 6 | 0 | -4.064888 | 2.755133  | 0.006834  |
| 24 | 7 | 0 | -1.276855 | 4.113127  | 1.407434  |
| 25 | 7 | 0 | -5.132295 | 3.175556  | -0.190947 |
| 26 | 6 | 0 | 0.659412  | -1.458987 | 1.939389  |
| 27 | 7 | 0 | 1.506254  | -1.150329 | 2.675157  |
| 28 | 6 | 0 | -0.709081 | -3.286500 | 1.204021  |
| 29 | 7 | 0 | -0.913396 | -4.427394 | 1.310847  |
| 30 | 1 | 0 | -4.968765 | 0.822487  | -1.258106 |
| 31 | 1 | 0 | -2.466864 | -3.471806 | -0.625412 |
| 32 | 1 | 0 | -5.929106 | -1.321165 | -2.012968 |
| 33 | 1 | 0 | -4.691159 | -3.448211 | -1.706137 |
| 34 | 1 | 0 | 0.051997  | 2.251526  | 0.101920  |
| 35 | 1 | 0 | 1.164940  | -1.115596 | -1.136435 |
| 36 | 1 | 0 | 2.320909  | 2.605006  | 0.734681  |
| 37 | 1 | 0 | 4.693759  | 2.057800  | 0.349903  |
| 38 | 1 | 0 | 3.547826  | -1.631185 | -1.548380 |
| 39 | 1 | 0 | 6.483203  | 1.736681  | -1.358537 |
| 40 | 1 | 0 | 5.718398  | 0.840645  | -2.705590 |
| 41 | 1 | 0 | 5.913940  | -1.131070 | 0.995464  |
| 42 | 1 | 0 | 7.409348  | -0.826443 | 0.079167  |
| 43 | 1 | 0 | 7.295343  | 0.315300  | -2.069577 |
| 44 | 1 | 0 | 6.600607  | 0.519679  | 0.928631  |

## TSD1

Standard orientation:

| Center Number | Atomic Number | Atomic Type | Coordinates (Angstroms) |           |           |
|---------------|---------------|-------------|-------------------------|-----------|-----------|
|               |               |             | X                       | Y         | Z         |
| 1             | 6             | 0           | 4.177155                | 0.165185  | -1.410907 |
| 2             | 6             | 0           | 2.657946                | 2.534706  | -1.028432 |
| 3             | 6             | 0           | 4.574081                | 1.373758  | -1.989182 |
| 4             | 6             | 0           | 3.000563                | 0.138873  | -0.653345 |
| 5             | 6             | 0           | 2.246009                | 1.329080  | -0.451862 |
| 6             | 6             | 0           | 3.820251                | 2.541893  | -1.805450 |
| 7             | 6             | 0           | 1.115534                | 1.017658  | 0.437889  |
| 8             | 6             | 0           | 0.969360                | -0.458463 | 0.383572  |
| 9             | 6             | 0           | 2.316328                | -0.971701 | 0.016296  |

|    |   |   |           |           |           |
|----|---|---|-----------|-----------|-----------|
| 10 | 6 | 0 | 2.799552  | -2.226155 | 0.298789  |
| 11 | 6 | 0 | 0.487214  | 1.897024  | 1.284990  |
| 12 | 6 | 0 | -0.138889 | -1.215060 | 0.166762  |
| 13 | 6 | 0 | -1.568953 | -0.862225 | 0.041431  |
| 14 | 6 | 0 | -4.317877 | -0.340569 | -0.381471 |
| 15 | 6 | 0 | -2.156770 | -1.064052 | -1.225950 |
| 16 | 6 | 0 | -2.387079 | -0.440072 | 1.098315  |
| 17 | 6 | 0 | -3.746104 | -0.187032 | 0.884976  |
| 18 | 6 | 0 | -3.504380 | -0.785050 | -1.438872 |
| 19 | 7 | 0 | -5.720523 | -0.055533 | -0.552451 |
| 20 | 6 | 0 | -5.968316 | 1.073968  | -1.453430 |
| 21 | 6 | 0 | -6.505540 | -1.236207 | -0.925600 |
| 22 | 6 | 0 | 2.062624  | -3.184115 | 1.069082  |
| 23 | 6 | 0 | 4.098134  | -2.671862 | -0.106101 |
| 24 | 7 | 0 | 1.507398  | -3.987690 | 1.701701  |
| 25 | 7 | 0 | 5.146650  | -3.066179 | -0.421115 |
| 26 | 6 | 0 | -0.249396 | 1.496264  | 2.444695  |
| 27 | 7 | 0 | -0.768194 | 1.248118  | 3.456025  |
| 28 | 6 | 0 | 0.684866  | 3.315049  | 1.207187  |
| 29 | 7 | 0 | 0.804603  | 4.471520  | 1.167173  |
| 30 | 1 | 0 | 4.770625  | -0.730093 | -1.571553 |
| 31 | 1 | 0 | 2.088035  | 3.450517  | -0.903225 |
| 32 | 1 | 0 | 5.477968  | 1.405553  | -2.596248 |
| 33 | 1 | 0 | 4.142692  | 3.470413  | -2.275310 |
| 34 | 1 | 0 | 0.069639  | -2.243527 | -0.135732 |
| 35 | 1 | 0 | -1.546199 | -1.427964 | -2.053023 |
| 36 | 1 | 0 | -1.981449 | -0.344883 | 2.099718  |
| 37 | 1 | 0 | -4.379782 | 0.129746  | 1.712515  |
| 38 | 1 | 0 | -3.926761 | -0.928500 | -2.432939 |
| 39 | 1 | 0 | -5.706429 | 0.859790  | -2.508738 |
| 40 | 1 | 0 | -5.389912 | 1.944336  | -1.121012 |
| 41 | 1 | 0 | -6.313028 | -2.046720 | -0.212560 |
| 42 | 1 | 0 | -7.572712 | -0.981459 | -0.880516 |
| 43 | 1 | 0 | -7.035002 | 1.331922  | -1.414400 |
| 44 | 1 | 0 | -6.285094 | -1.606142 | -1.946593 |

## TSDA

Standard orientation:

| Center<br>Number | Atomic<br>Number | Atomic<br>Type | Coordinates (Angstroms) |           |           |
|------------------|------------------|----------------|-------------------------|-----------|-----------|
|                  |                  |                | X                       | Y         | Z         |
| 1                | 6                | 0              | 4.265829                | 0.234341  | -1.256698 |
| 2                | 6                | 0              | 2.681190                | 2.570912  | -0.943319 |
| 3                | 6                | 0              | 4.673123                | 1.456123  | -1.798897 |
| 4                | 6                | 0              | 3.046821                | 0.178039  | -0.571334 |
| 5                | 6                | 0              | 2.259024                | 1.351861  | -0.403446 |
| 6                | 6                | 0              | 3.887178                | 2.607879  | -1.649755 |
| 7                | 6                | 0              | 1.084581                | 1.010280  | 0.415846  |
| 8                | 6                | 0              | 0.969997                | -0.467745 | 0.338400  |
| 9                | 6                | 0              | 2.345822                | -0.951833 | 0.046550  |
| 10               | 6                | 0              | 2.835164                | -2.199901 | 0.346243  |
| 11               | 6                | 0              | 0.391181                | 1.869345  | 1.232560  |
| 12               | 6                | 0              | -0.107966               | -1.242834 | 0.046320  |
| 13               | 6                | 0              | -1.534813               | -0.917504 | -0.160866 |
| 14               | 6                | 0              | -4.263141               | -0.441810 | -0.741486 |
| 15               | 6                | 0              | -2.044057               | -1.121710 | -1.459880 |
| 16               | 6                | 0              | -2.421304               | -0.516356 | 0.849917  |
| 17               | 6                | 0              | -3.768872               | -0.286376 | 0.561439  |
| 18               | 6                | 0              | -3.383464               | -0.864045 | -1.748086 |
| 19               | 7                | 0              | -5.643533               | -0.203092 | -1.082197 |

|    |   |   |           |           |           |
|----|---|---|-----------|-----------|-----------|
| 20 | 6 | 0 | -6.565625 | -1.130958 | -0.419631 |
| 21 | 6 | 0 | -6.044984 | 1.194516  | -0.894257 |
| 22 | 6 | 0 | 2.072771  | -3.176765 | 1.066490  |
| 23 | 6 | 0 | 4.162831  | -2.618778 | 0.013444  |
| 24 | 7 | 0 | 1.496782  | -3.994363 | 1.661453  |
| 25 | 7 | 0 | 5.234812  | -2.991288 | -0.243839 |
| 26 | 6 | 0 | -0.405512 | 1.443909  | 2.342722  |
| 27 | 7 | 0 | -0.979660 | 1.177052  | 3.318787  |
| 28 | 6 | 0 | 0.566608  | 3.291524  | 1.180449  |
| 29 | 7 | 0 | 0.666761  | 4.450360  | 1.159395  |
| 30 | 1 | 0 | 4.885035  | -0.647919 | -1.389846 |
| 31 | 1 | 0 | 2.087375  | 3.474671  | -0.844318 |
| 32 | 1 | 0 | 5.610803  | 1.511128  | -2.350506 |
| 33 | 1 | 0 | 4.218857  | 3.547039  | -2.091170 |
| 34 | 1 | 0 | 0.139262  | -2.262946 | -0.255453 |
| 35 | 1 | 0 | -1.381697 | -1.469951 | -2.252846 |
| 36 | 1 | 0 | -2.074879 | -0.421685 | 1.873419  |
| 37 | 1 | 0 | -4.437567 | 0.011763  | 1.368375  |
| 38 | 1 | 0 | -3.766564 | -1.000801 | -2.758657 |
| 39 | 1 | 0 | -6.631445 | -0.977166 | 0.675561  |
| 40 | 1 | 0 | -6.247317 | -2.163386 | -0.607493 |
| 41 | 1 | 0 | -5.349894 | 1.852673  | -1.429396 |
| 42 | 1 | 0 | -7.049112 | 1.335206  | -1.315930 |
| 43 | 1 | 0 | -7.569956 | -0.995713 | -0.842563 |
| 44 | 1 | 0 | -6.073336 | 1.503693  | 0.169255  |

#### 4, 248 K, dichloromethane, B3LYP/aug-cc-pVDZ

### GS

Standard orientation:

| Center<br>Number | Atomic<br>Number | Atomic<br>Type | Coordinates (Angstroms) |           |           |
|------------------|------------------|----------------|-------------------------|-----------|-----------|
|                  |                  |                | X                       | Y         | Z         |
| 1                | 6                | 0              | -5.837229               | -0.952822 | 0.047879  |
| 2                | 6                | 0              | -4.979599               | 1.760700  | 0.007770  |
| 3                | 6                | 0              | -6.766838               | 0.096402  | 0.053952  |
| 4                | 6                | 0              | -4.483412               | -0.622485 | 0.021728  |
| 5                | 6                | 0              | -4.060362               | 0.713354  | 0.001881  |
| 6                | 6                | 0              | -6.343179               | 1.436014  | 0.034181  |
| 7                | 6                | 0              | -2.560717               | 0.771563  | -0.024529 |
| 8                | 6                | 0              | -2.082817               | -0.625251 | -0.018708 |
| 9                | 6                | 0              | -3.278172               | -1.507161 | 0.009819  |
| 10               | 8                | 0              | -3.296220               | -2.737223 | 0.022086  |
| 11               | 8                | 0              | -1.919768               | 1.823964  | -0.046424 |
| 12               | 6                | 0              | -0.826754               | -1.207046 | -0.033198 |
| 13               | 6                | 0              | 0.514578                | -0.721427 | -0.058136 |
| 14               | 6                | 0              | 3.265014                | 0.042541  | -0.079289 |
| 15               | 6                | 0              | 1.561914                | -1.684740 | -0.064424 |
| 16               | 6                | 0              | 0.902961                | 0.645744  | -0.074829 |
| 17               | 6                | 0              | 2.228089                | 1.035614  | -0.094800 |
| 18               | 6                | 0              | 2.899724                | -1.344259 | -0.083843 |
| 19               | 7                | 0              | 4.581324                | 0.412673  | -0.047072 |
| 20               | 6                | 0              | 4.987280                | 1.816132  | -0.169566 |
| 21               | 6                | 0              | 5.657681                | -0.576046 | -0.161677 |
| 22               | 6                | 0              | 2.591433                | 2.505786  | -0.141721 |
| 23               | 6                | 0              | 3.969561                | 2.752501  | 0.469857  |
| 24               | 6                | 0              | 3.972166                | -2.413607 | -0.116161 |
| 25               | 6                | 0              | 5.276633                | -1.899458 | 0.490845  |

|    |   |   |           |           |           |
|----|---|---|-----------|-----------|-----------|
| 26 | 1 | 0 | -6.160854 | -1.992988 | 0.063091  |
| 27 | 1 | 0 | -4.646552 | 2.797829  | -0.007724 |
| 28 | 1 | 0 | -7.833946 | -0.126309 | 0.074265  |
| 29 | 1 | 0 | -7.088649 | 2.231676  | 0.039506  |
| 30 | 1 | 0 | -0.892176 | -2.300561 | -0.022052 |
| 31 | 1 | 0 | 1.295759  | -2.743513 | -0.054552 |
| 32 | 1 | 0 | 0.124048  | 1.405463  | -0.073666 |
| 33 | 1 | 0 | 5.964780  | 1.917226  | 0.317965  |
| 34 | 1 | 0 | 5.125682  | 2.073880  | -1.234776 |
| 35 | 1 | 0 | 6.545753  | -0.149864 | 0.320924  |
| 36 | 1 | 0 | 5.908967  | -0.734127 | -1.225715 |
| 37 | 1 | 0 | 1.821006  | 3.091222  | 0.376063  |
| 38 | 1 | 0 | 2.594345  | 2.850268  | -1.188838 |
| 39 | 1 | 0 | 3.941695  | 2.574771  | 1.554755  |
| 40 | 1 | 0 | 4.287792  | 3.790984  | 0.311914  |
| 41 | 1 | 0 | 3.618840  | -3.307140 | 0.414749  |
| 42 | 1 | 0 | 4.155493  | -2.720970 | -1.158660 |
| 43 | 1 | 0 | 5.159393  | -1.751343 | 1.574162  |
| 44 | 1 | 0 | 6.089530  | -2.621431 | 0.340616  |

## TS

Standard orientation:

| Center<br>Number | Atomic<br>Number | Atomic<br>Type | Coordinates (Angstroms) |           |           |
|------------------|------------------|----------------|-------------------------|-----------|-----------|
|                  |                  |                | X                       | Y         | Z         |
| 1                | 6                | 0              | 5.817771                | -0.000010 | 0.451366  |
| 2                | 6                | 0              | 4.461307                | 0.000029  | -2.053841 |
| 3                | 6                | 0              | 6.528679                | 0.000005  | -0.752324 |
| 4                | 6                | 0              | 4.422570                | -0.000005 | 0.385221  |
| 5                | 6                | 0              | 3.752857                | 0.000014  | -0.850543 |
| 6                | 6                | 0              | 5.858033                | 0.000024  | -1.990570 |
| 7                | 6                | 0              | 2.273977                | 0.000015  | -0.634518 |
| 8                | 6                | 0              | 2.070053                | -0.000008 | 0.850705  |
| 9                | 6                | 0              | 3.426400                | -0.000019 | 1.493330  |
| 10               | 8                | 0              | 3.668824                | -0.000036 | 2.692188  |
| 11               | 8                | 0              | 1.424301                | 0.000031  | -1.512501 |
| 12               | 6                | 0              | 0.924276                | -0.000018 | 1.561319  |
| 13               | 6                | 0              | -0.462525               | -0.000012 | 1.035858  |
| 14               | 6                | 0              | -3.138982               | -0.000002 | 0.091092  |
| 15               | 6                | 0              | -1.145619               | -1.200958 | 0.806603  |
| 16               | 6                | 0              | -1.145623               | 1.200939  | 0.806639  |
| 17               | 6                | 0              | -2.463351               | 1.223544  | 0.342661  |
| 18               | 6                | 0              | -2.463347               | -1.223554 | 0.342625  |
| 19               | 7                | 0              | -4.434851               | 0.000004  | -0.440096 |
| 20               | 6                | 0              | -5.214219               | 1.232169  | -0.379419 |
| 21               | 6                | 0              | -5.214215               | -1.232167 | -0.379457 |
| 22               | 6                | 0              | -3.156442               | 2.556539  | 0.126185  |
| 23               | 6                | 0              | -4.366463               | 2.427952  | -0.800658 |
| 24               | 6                | 0              | -3.156435               | -2.556545 | 0.126110  |
| 25               | 6                | 0              | -4.366454               | -2.427934 | -0.800731 |
| 26               | 1                | 0              | 6.332075                | -0.000025 | 1.411426  |
| 27               | 1                | 0              | 3.938665                | 0.000044  | -3.009440 |
| 28               | 1                | 0              | 7.618619                | 0.000002  | -0.736937 |
| 29               | 1                | 0              | 6.441077                | 0.000036  | -2.911621 |
| 30               | 1                | 0              | 1.049053                | -0.000035 | 2.651366  |
| 31               | 1                | 0              | -0.638781               | -2.151045 | 0.983647  |
| 32               | 1                | 0              | -0.638788               | 2.151021  | 0.983712  |
| 33               | 1                | 0              | -6.073880               | 1.113295  | -1.052035 |
| 34               | 1                | 0              | -5.617756               | 1.398153  | 0.640005  |
| 35               | 1                | 0              | -6.073875               | -1.113274 | -1.052072 |

|    |   |   |           |           |           |
|----|---|---|-----------|-----------|-----------|
| 36 | 1 | 0 | -5.617754 | -1.398182 | 0.639960  |
| 37 | 1 | 0 | -2.437994 | 3.284461  | -0.275318 |
| 38 | 1 | 0 | -3.486091 | 2.956062  | 1.099347  |
| 39 | 1 | 0 | -4.037121 | 2.284159  | -1.840005 |
| 40 | 1 | 0 | -4.975402 | 3.341321  | -0.769226 |
| 41 | 1 | 0 | -2.437984 | -3.284454 | -0.275412 |
| 42 | 1 | 0 | -3.486084 | -2.956095 | 1.099260  |
| 43 | 1 | 0 | -4.037112 | -2.284109 | -1.840073 |
| 44 | 1 | 0 | -4.975391 | -3.341306 | -0.769327 |

## GS, Sz 248K,

Standard orientation:

| Center<br>Number | Atomic<br>Number | Atomic<br>Type | Coordinates (Angstroms) |           |           |
|------------------|------------------|----------------|-------------------------|-----------|-----------|
|                  |                  |                | X                       | Y         | Z         |
| 1                | 6                | 0              | -5.848286               | -0.942624 | 0.044143  |
| 2                | 6                | 0              | -4.998979               | 1.746733  | 0.008352  |
| 3                | 6                | 0              | -6.780715               | 0.097014  | 0.049596  |
| 4                | 6                | 0              | -4.495325               | -0.620436 | 0.018844  |
| 5                | 6                | 0              | -4.076279               | 0.709293  | 0.003772  |
| 6                | 6                | 0              | -6.359804               | 1.428826  | 0.031902  |
| 7                | 6                | 0              | -2.572656               | 0.769734  | -0.019758 |
| 8                | 6                | 0              | -2.089069               | -0.624458 | -0.013344 |
| 9                | 6                | 0              | -3.286081               | -1.502418 | 0.007532  |
| 10               | 8                | 0              | -3.308676               | -2.721712 | 0.012112  |
| 11               | 8                | 0              | -1.935257               | 1.810307  | -0.038029 |
| 12               | 6                | 0              | -0.827830               | -1.205248 | -0.024007 |
| 13               | 6                | 0              | 0.520432                | -0.722840 | -0.060082 |
| 14               | 6                | 0              | 3.278922                | 0.045170  | -0.081947 |
| 15               | 6                | 0              | 1.572546                | -1.684261 | -0.053284 |
| 16               | 6                | 0              | 0.912733                | 0.643332  | -0.072043 |
| 17               | 6                | 0              | 2.239782                | 1.034112  | -0.097977 |
| 18               | 6                | 0              | 2.911573                | -1.340542 | -0.081327 |
| 19               | 7                | 0              | 4.592923                | 0.413160  | -0.060906 |
| 20               | 6                | 0              | 4.988913                | 1.814264  | -0.161626 |
| 21               | 6                | 0              | 5.660860                | -0.575697 | -0.166490 |
| 22               | 6                | 0              | 2.610376                | 2.503607  | -0.142026 |
| 23               | 6                | 0              | 3.977843                | 2.753699  | 0.463265  |
| 24               | 6                | 0              | 3.987290                | -2.407042 | -0.106002 |
| 25               | 6                | 0              | 5.292305                | -1.899370 | 0.484095  |
| 26               | 1                | 0              | -6.172374               | -1.975777 | 0.057355  |
| 27               | 1                | 0              | -4.672537               | 2.778827  | -0.004640 |
| 28               | 1                | 0              | -7.842411               | -0.122708 | 0.068090  |
| 29               | 1                | 0              | -7.100900               | 2.218748  | 0.036117  |
| 30               | 1                | 0              | -0.893444               | -2.303271 | -0.003148 |
| 31               | 1                | 0              | 1.310919                | -2.746786 | -0.034693 |
| 32               | 1                | 0              | 0.138277                | 1.409026  | -0.066180 |
| 33               | 1                | 0              | 5.944986                | 1.905298  | 0.329619  |
| 34               | 1                | 0              | 5.137047                | 2.075078  | -1.202749 |
| 35               | 1                | 0              | 6.541929                | -0.138966 | 0.285246  |
| 36               | 1                | 0              | 5.892802                | -0.741107 | -1.208971 |
| 37               | 1                | 0              | 1.854469                | 3.092205  | 0.362332  |
| 38               | 1                | 0              | 2.618306                | 2.837067  | -1.174043 |
| 39               | 1                | 0              | 3.947346                | 2.589943  | 1.534757  |
| 40               | 1                | 0              | 4.295611                | 3.788759  | 0.298661  |
| 41               | 1                | 0              | 3.645500                | -3.293308 | 0.420043  |
| 42               | 1                | 0              | 4.165091                | -2.714852 | -1.131114 |
| 43               | 1                | 0              | 5.188618                | -1.758185 | 1.553226  |
| 44               | 1                | 0              | 6.090479                | -2.625977 | 0.324245  |

## TS Sz 248 K

Standard orientation:

| Center<br>Number | Atomic<br>Number | Atomic<br>Type | Coordinates (Angstroms) |           |           |
|------------------|------------------|----------------|-------------------------|-----------|-----------|
|                  |                  |                | X                       | Y         | Z         |
| 1                | 6                | 0              | -5.815062               | -0.000006 | 0.439796  |
| 2                | 6                | 0              | -4.465199               | 0.000035  | -2.053780 |
| 3                | 6                | 0              | -6.522165               | 0.000018  | -0.762432 |
| 4                | 6                | 0              | -4.429659               | -0.000008 | 0.380026  |
| 5                | 6                | 0              | -3.761772               | 0.000012  | -0.852114 |
| 6                | 6                | 0              | -5.849866               | 0.000038  | -1.994566 |
| 7                | 6                | 0              | -2.289577               | 0.000004  | -0.626152 |
| 8                | 6                | 0              | -2.082650               | -0.000020 | 0.864062  |
| 9                | 6                | 0              | -3.440822               | -0.000029 | 1.494958  |
| 10               | 8                | 0              | -3.693490               | -0.000050 | 2.684441  |
| 11               | 8                | 0              | -1.448126               | 0.000017  | -1.491022 |
| 12               | 6                | 0              | -0.929750               | -0.000032 | 1.563786  |
| 13               | 6                | 0              | 0.460911                | -0.000020 | 1.032397  |
| 14               | 6                | 0              | 3.152792                | -0.000000 | 0.093834  |
| 15               | 6                | 0              | 1.152779                | 1.200505  | 0.806822  |
| 16               | 6                | 0              | 1.152776                | -1.200551 | 0.806784  |
| 17               | 6                | 0              | 2.475321                | -1.225375 | 0.350306  |
| 18               | 6                | 0              | 2.475315                | 1.225364  | 0.350349  |
| 19               | 7                | 0              | 4.450942                | 0.000012  | -0.422440 |
| 20               | 6                | 0              | 5.215876                | -1.239173 | -0.386806 |
| 21               | 6                | 0              | 5.215874                | 1.239198  | -0.386757 |
| 22               | 6                | 0              | 3.165617                | -2.560630 | 0.121623  |
| 23               | 6                | 0              | 4.370448                | -2.435227 | -0.802030 |
| 24               | 6                | 0              | 3.165617                | 2.560645  | 0.121741  |
| 25               | 6                | 0              | 4.370434                | 2.435260  | -0.801956 |
| 26               | 1                | 0              | -6.324438               | -0.000021 | 1.398060  |
| 27               | 1                | 0              | -3.946171               | 0.000051  | -3.006770 |
| 28               | 1                | 0              | -7.600713               | 0.000020  | -0.752638 |
| 29               | 1                | 0              | -6.419719               | 0.000056  | -2.918092 |
| 30               | 1                | 0              | -1.045316               | -0.000050 | 2.650723  |
| 31               | 1                | 0              | 0.645130                | 2.152656  | 0.980644  |
| 32               | 1                | 0              | 0.645231                | -2.152521 | 0.980540  |
| 33               | 1                | 0              | 6.067885                | -1.122145 | -1.053771 |
| 34               | 1                | 0              | 5.618148                | -1.419947 | 0.616811  |
| 35               | 1                | 0              | 6.067886                | 1.122194  | -1.053743 |
| 36               | 1                | 0              | 5.618101                | 1.419923  | 0.616738  |
| 37               | 1                | 0              | 2.454246                | -3.278798 | -0.279696 |
| 38               | 1                | 0              | 3.490687                | -2.966559 | 1.078376  |
| 39               | 1                | 0              | 4.041657                | -2.297921 | -1.830387 |
| 40               | 1                | 0              | 4.976900                | -3.345929 | -0.772432 |
| 41               | 1                | 0              | 2.454272                | 3.278780  | -0.279553 |
| 42               | 1                | 0              | 3.490549                | 2.966372  | 1.078099  |
| 43               | 1                | 0              | 4.041679                | 2.298004  | -1.830204 |
| 44               | 1                | 0              | 4.976893                | 3.345978  | -0.772322 |

## 5, 298 K, dichloromethane, B3LYP/aug-cc-pVDZ

### GS

Standard orientation:

| Center<br>Number | Atomic<br>Number | Atomic<br>Type | Coordinates (Angstroms) |   |   |
|------------------|------------------|----------------|-------------------------|---|---|
|                  |                  |                | X                       | Y | Z |

|    |   |   |           |           |           |
|----|---|---|-----------|-----------|-----------|
| 1  | 6 | 0 | -5.487367 | 0.923491  | -0.037020 |
| 2  | 6 | 0 | -4.631975 | -1.790500 | 0.057175  |
| 3  | 6 | 0 | -6.416761 | -0.123998 | -0.009490 |
| 4  | 6 | 0 | -4.132882 | 0.592054  | -0.017126 |
| 5  | 6 | 0 | -3.710973 | -0.743997 | 0.029203  |
| 6  | 6 | 0 | -5.994069 | -1.464270 | 0.037025  |
| 7  | 6 | 0 | -2.213755 | -0.807944 | 0.043308  |
| 8  | 6 | 0 | -1.729963 | 0.592739  | -0.003789 |
| 9  | 6 | 0 | -2.931059 | 1.477088  | -0.037736 |
| 10 | 8 | 0 | -2.944548 | 2.704318  | -0.076152 |
| 11 | 8 | 0 | -1.573230 | -1.856766 | 0.089751  |
| 12 | 6 | 0 | -0.481777 | 1.172068  | -0.021820 |
| 13 | 6 | 0 | 0.869817  | 0.681934  | -0.011987 |
| 14 | 6 | 0 | 3.613160  | -0.077823 | -0.004829 |
| 15 | 6 | 0 | 1.251110  | -0.680771 | 0.003899  |
| 16 | 6 | 0 | 1.907505  | 1.646612  | -0.021753 |
| 17 | 6 | 0 | 3.253884  | 1.305601  | -0.022267 |
| 18 | 6 | 0 | 2.584461  | -1.072802 | 0.010242  |
| 19 | 7 | 0 | 4.954737  | -0.453832 | -0.001128 |
| 20 | 6 | 0 | 5.922517  | 0.117142  | 0.922922  |
| 21 | 6 | 0 | 5.489905  | -1.445579 | -0.921272 |
| 22 | 1 | 0 | -5.809826 | 1.963384  | -0.072988 |
| 23 | 1 | 0 | -4.299862 | -2.827272 | 0.093598  |
| 24 | 1 | 0 | -7.483813 | 0.098969  | -0.024058 |
| 25 | 1 | 0 | -6.740708 | -2.258461 | 0.057718  |
| 26 | 1 | 0 | -0.544973 | 2.265254  | -0.053288 |
| 27 | 1 | 0 | 0.471314  | -1.437014 | 0.050146  |
| 28 | 1 | 0 | 1.636487  | 2.702422  | -0.070710 |
| 29 | 1 | 0 | 6.488188  | -0.700371 | 1.397892  |
| 30 | 1 | 0 | 6.647644  | 0.783992  | 0.428159  |
| 31 | 1 | 0 | 5.412149  | 0.668755  | 1.716842  |
| 32 | 1 | 0 | 5.757406  | -2.392630 | -0.424616 |
| 33 | 1 | 0 | 4.772609  | -1.650309 | -1.720415 |
| 34 | 1 | 0 | 6.402204  | -1.042357 | -1.389223 |
| 35 | 6 | 0 | 2.904936  | -2.544045 | 0.159198  |
| 36 | 1 | 0 | 3.239717  | -3.008313 | -0.778328 |
| 37 | 1 | 0 | 3.700048  | -2.698176 | 0.900878  |
| 38 | 1 | 0 | 2.013185  | -3.086908 | 0.492528  |
| 39 | 6 | 0 | 4.287948  | 2.400169  | -0.165879 |
| 40 | 1 | 0 | 4.808109  | 2.626814  | 0.774631  |
| 41 | 1 | 0 | 5.053079  | 2.120122  | -0.902078 |
| 42 | 1 | 0 | 3.808129  | 3.325506  | -0.505601 |

## TSA

Standard orientation:

| Center<br>Number | Atomic<br>Number | Atomic<br>Type | Coordinates (Angstroms) |           |           |
|------------------|------------------|----------------|-------------------------|-----------|-----------|
|                  |                  |                | X                       | Y         | Z         |
| 1                | 6                | 0              | 5.477748                | -0.505354 | 0.067118  |
| 2                | 6                | 0              | 4.171560                | 2.001498  | -0.288793 |
| 3                | 6                | 0              | 6.212429                | 0.672385  | -0.098376 |
| 4                | 6                | 0              | 4.084162                | -0.412597 | 0.052341  |
| 5                | 6                | 0              | 3.439272                | 0.824141  | -0.123381 |
| 6                | 6                | 0              | 5.566672                | 1.911409  | -0.274258 |
| 7                | 6                | 0              | 1.956914                | 0.639134  | -0.098981 |
| 8                | 6                | 0              | 1.723530                | -0.826765 | 0.110030  |
| 9                | 6                | 0              | 3.066679                | -1.490243 | 0.204211  |
| 10               | 8                | 0              | 3.284342                | -2.681691 | 0.373101  |
| 11               | 8                | 0              | 1.122733                | 1.522612  | -0.226012 |
| 12               | 6                | 0              | 0.563100                | -1.504350 | 0.209414  |

|    |   |   |           |           |           |
|----|---|---|-----------|-----------|-----------|
| 13 | 6 | 0 | -0.812385 | -0.952653 | 0.133511  |
| 14 | 6 | 0 | -3.467805 | 0.008042  | 0.004316  |
| 15 | 6 | 0 | -1.490565 | -0.894462 | -1.089996 |
| 16 | 6 | 0 | -1.477970 | -0.539118 | 1.293459  |
| 17 | 6 | 0 | -2.797045 | -0.069674 | 1.251233  |
| 18 | 6 | 0 | -2.799850 | -0.404325 | -1.176687 |
| 19 | 7 | 0 | -4.792871 | 0.491727  | -0.062566 |
| 20 | 6 | 0 | -5.149118 | 1.817022  | 0.401628  |
| 21 | 6 | 0 | -5.876161 | -0.314694 | -0.586905 |
| 22 | 1 | 0 | 5.972686  | -1.465888 | 0.203514  |
| 23 | 1 | 0 | 3.668177  | 2.957758  | -0.424501 |
| 24 | 1 | 0 | 7.301827  | 0.635884  | -0.091847 |
| 25 | 1 | 0 | 6.168050  | 2.811744  | -0.400657 |
| 26 | 1 | 0 | 0.658172  | -2.585732 | 0.364634  |
| 27 | 1 | 0 | -0.978678 | -1.202067 | -2.002627 |
| 28 | 1 | 0 | -0.969612 | -0.603632 | 2.256302  |
| 29 | 1 | 0 | -5.696466 | 2.363772  | -0.386551 |
| 30 | 1 | 0 | -5.793541 | 1.799405  | 1.299924  |
| 31 | 1 | 0 | -4.246420 | 2.391183  | 0.634111  |
| 32 | 1 | 0 | -6.290157 | 0.084661  | -1.531070 |
| 33 | 1 | 0 | -5.532900 | -1.338859 | -0.765694 |
| 34 | 1 | 0 | -6.704886 | -0.364882 | 0.141723  |
| 35 | 6 | 0 | -3.452440 | -0.268810 | -2.532660 |
| 36 | 1 | 0 | -4.192677 | -1.059326 | -2.723413 |
| 37 | 1 | 0 | -3.979270 | 0.691289  | -2.614987 |
| 38 | 1 | 0 | -2.699769 | -0.324116 | -3.328308 |
| 39 | 6 | 0 | -3.496485 | 0.290740  | 2.541147  |
| 40 | 1 | 0 | -3.564381 | 1.377860  | 2.691768  |
| 41 | 1 | 0 | -4.522975 | -0.099663 | 2.548768  |
| 42 | 1 | 0 | -2.957149 | -0.126803 | 3.399933  |

## TSD

Standard orientation:

| Center<br>Number | Atomic<br>Number | Atomic<br>Type | Coordinates (Angstroms) |           |           |
|------------------|------------------|----------------|-------------------------|-----------|-----------|
|                  |                  |                | X                       | Y         | Z         |
| 1                | 6                | 0              | 5.487716                | 0.882369  | -0.000001 |
| 2                | 6                | 0              | 4.596599                | -1.822979 | -0.000004 |
| 3                | 6                | 0              | 6.401962                | -0.177114 | -0.000005 |
| 4                | 6                | 0              | 4.128120                | 0.568079  | 0.000000  |
| 5                | 6                | 0              | 3.688562                | -0.763710 | -0.000001 |
| 6                | 6                | 0              | 5.961510                | -1.513548 | -0.000006 |
| 7                | 6                | 0              | 2.193276                | -0.813456 | 0.000002  |
| 8                | 6                | 0              | 1.723203                | 0.599962  | 0.000004  |
| 9                | 6                | 0              | 2.942840                | 1.470942  | 0.000004  |
| 10               | 8                | 0              | 2.968500                | 2.696141  | 0.000006  |
| 11               | 8                | 0              | 1.538218                | -1.851164 | 0.000003  |
| 12               | 6                | 0              | 0.491926                | 1.195799  | 0.000004  |
| 13               | 6                | 0              | -0.878385               | 0.721148  | 0.000002  |
| 14               | 6                | 0              | -3.616194               | 0.004048  | -0.000003 |
| 15               | 6                | 0              | -1.270878               | -0.633875 | 0.000005  |
| 16               | 6                | 0              | -1.891511               | 1.705800  | -0.000001 |
| 17               | 6                | 0              | -3.245332               | 1.370923  | -0.000004 |
| 18               | 6                | 0              | -2.617989               | -1.004378 | 0.000004  |
| 19               | 7                | 0              | -5.024227               | -0.276465 | -0.000006 |
| 20               | 6                | 0              | -5.596724               | -0.816143 | -1.226487 |
| 21               | 6                | 0              | -5.596731               | -0.816119 | 1.226483  |
| 22               | 1                | 0              | 5.823475                | 1.918540  | -0.000000 |
| 23               | 1                | 0              | 4.250999                | -2.855853 | -0.000005 |
| 24               | 1                | 0              | 7.471896                | 0.031715  | -0.000007 |



|    |   |   |           |           |           |
|----|---|---|-----------|-----------|-----------|
| 25 | 1 | 0 | 6.698192  | -2.317127 | -0.000009 |
| 26 | 1 | 0 | 0.568866  | 2.288494  | 0.000004  |
| 27 | 1 | 0 | -0.501356 | -1.401506 | 0.000009  |
| 28 | 1 | 0 | -1.604670 | 2.758229  | -0.000003 |
| 29 | 1 | 0 | -5.479088 | -1.910935 | -1.338906 |
| 30 | 1 | 0 | -6.674710 | -0.597147 | -1.245605 |
| 31 | 1 | 0 | -5.136776 | -0.329493 | -2.095065 |
| 32 | 1 | 0 | -5.479088 | -1.910908 | 1.338927  |
| 33 | 1 | 0 | -5.136794 | -0.329447 | 2.095053  |
| 34 | 1 | 0 | -6.674719 | -0.597130 | 1.245586  |
| 35 | 6 | 0 | -2.963654 | -2.477435 | 0.000013  |
| 36 | 1 | 0 | -3.550344 | -2.758373 | 0.883778  |
| 37 | 1 | 0 | -3.550361 | -2.758381 | -0.883738 |
| 38 | 1 | 0 | -2.048614 | -3.080386 | 0.000007  |
| 39 | 6 | 0 | -4.295357 | 2.456294  | -0.000010 |
| 40 | 1 | 0 | -4.946663 | 2.379116  | -0.880692 |
| 41 | 1 | 0 | -4.946673 | 2.379115  | 0.880664  |
| 42 | 1 | 0 | -3.825478 | 3.447272  | -0.000006 |

## TSDA

Standard orientation:

| Center<br>Number | Atomic<br>Number | Atomic<br>Type | Coordinates (Angstroms) |           |           |
|------------------|------------------|----------------|-------------------------|-----------|-----------|
|                  |                  |                | X                       | Y         | Z         |
| 1                | 6                | 0              | 5.467121                | -0.509686 | -0.060360 |
| 2                | 6                | 0              | 4.157233                | 2.017235  | 0.069218  |
| 3                | 6                | 0              | 6.199943                | 0.679862  | -0.015243 |
| 4                | 6                | 0              | 4.073516                | -0.418632 | -0.039817 |
| 5                | 6                | 0              | 3.426670                | 0.828059  | 0.024243  |
| 6                | 6                | 0              | 5.552363                | 1.928761  | 0.048764  |
| 7                | 6                | 0              | 1.944989                | 0.638885  | 0.033199  |
| 8                | 6                | 0              | 1.714082                | -0.841186 | -0.029613 |
| 9                | 6                | 0              | 3.058252                | -1.508098 | -0.077143 |
| 10               | 8                | 0              | 3.276640                | -2.709748 | -0.135015 |
| 11               | 8                | 0              | 1.108569                | 1.528023  | 0.082165  |
| 12               | 6                | 0              | 0.555106                | -1.527364 | -0.043922 |
| 13               | 6                | 0              | -0.819788               | -0.970260 | 0.001392  |
| 14               | 6                | 0              | -3.463570               | 0.009288  | 0.079483  |
| 15               | 6                | 0              | -1.506323               | -0.678423 | -1.182245 |
| 16               | 6                | 0              | -1.470094               | -0.783582 | 1.226257  |
| 17               | 6                | 0              | -2.781694               | -0.293174 | 1.279932  |
| 18               | 6                | 0              | -2.820122               | -0.186595 | -1.164355 |
| 19               | 7                | 0              | -4.805696               | 0.511872  | 0.207870  |
| 20               | 6                | 0              | -5.023775               | 1.917668  | -0.101636 |
| 21               | 6                | 0              | -5.891888               | -0.369996 | -0.193801 |
| 22               | 1                | 0              | 5.963443                | -1.477849 | -0.109993 |
| 23               | 1                | 0              | 3.652619                | 2.981143  | 0.118656  |
| 24               | 1                | 0              | 7.289320                | 0.645100  | -0.029611 |
| 25               | 1                | 0              | 6.152453                | 2.838119  | 0.082745  |
| 26               | 1                | 0              | 0.647678                | -2.618662 | -0.093709 |
| 27               | 1                | 0              | -1.009401               | -0.827271 | -2.141543 |
| 28               | 1                | 0              | -0.947297               | -1.013973 | 2.154963  |
| 29               | 1                | 0              | -5.145229               | 2.131857  | -1.181573 |
| 30               | 1                | 0              | -5.938039               | 2.262274  | 0.404939  |
| 31               | 1                | 0              | -4.182676               | 2.513367  | 0.273212  |
| 32               | 1                | 0              | -6.097214               | -0.373062 | -1.282289 |
| 33               | 1                | 0              | -5.667082               | -1.398063 | 0.115390  |
| 34               | 1                | 0              | -6.817875               | -0.057374 | 0.312245  |
| 35               | 6                | 0              | -3.496090               | 0.119191  | -2.483144 |
| 36               | 1                | 0              | -4.412328               | -0.469599 | -2.618409 |

|    |   |   |           |           |           |
|----|---|---|-----------|-----------|-----------|
| 37 | 1 | 0 | -3.774646 | 1.177942  | -2.561928 |
| 38 | 1 | 0 | -2.824494 | -0.111664 | -3.318491 |
| 39 | 6 | 0 | -3.450026 | -0.090099 | 2.619473  |
| 40 | 1 | 0 | -3.725832 | 0.962408  | 2.770516  |
| 41 | 1 | 0 | -4.378643 | -0.671560 | 2.693624  |
| 42 | 1 | 0 | -2.781982 | -0.393555 | 3.434891  |

6a, 298 K, benzene, B3LYP/aug-cc-pVTZ

GS

Standard orientation:

| Center<br>Number | Atomic<br>Number | Atomic<br>Type | Coordinates (Angstroms) |           |           |
|------------------|------------------|----------------|-------------------------|-----------|-----------|
|                  |                  |                | X                       | Y         | Z         |
| 1                | 6                | 0              | 2.345556                | 0.361610  | 0.019524  |
| 2                | 1                | 0              | 2.395504                | 1.442929  | 0.076076  |
| 3                | 6                | 0              | 1.152990                | -0.291463 | -0.025733 |
| 4                | 1                | 0              | 1.188447                | -1.377728 | -0.084038 |
| 5                | 6                | 0              | -0.137220               | 0.297645  | -0.001405 |
| 6                | 1                | 0              | -0.207918               | 1.375270  | 0.061025  |
| 7                | 6                | 0              | -1.265647               | -0.473240 | -0.051458 |
| 8                | 1                | 0              | -1.152808               | -1.550740 | -0.085754 |
| 9                | 6                | 0              | 3.587298                | -0.362066 | -0.006141 |
| 10               | 8                | 0              | 4.707705                | 0.133094  | 0.030973  |
| 11               | 1                | 0              | 3.477711                | -1.465099 | -0.065248 |
| 12               | 7                | 0              | -2.543439               | -0.052757 | -0.077455 |
| 13               | 6                | 0              | -2.862448               | 1.362822  | -0.006085 |
| 14               | 1                | 0              | -3.914606               | 1.503220  | -0.240322 |
| 15               | 1                | 0              | -2.668512               | 1.770985  | 0.990629  |
| 16               | 1                | 0              | -2.270038               | 1.921891  | -0.729926 |
| 17               | 6                | 0              | -3.641004               | -0.993718 | 0.076574  |
| 18               | 1                | 0              | -4.084553               | -0.929064 | 1.074667  |
| 19               | 1                | 0              | -4.419066               | -0.789114 | -0.659655 |
| 20               | 1                | 0              | -3.278887               | -2.007538 | -0.074703 |

TS1a

Standard orientation:

| Center<br>Number | Atomic<br>Number | Atomic<br>Type | Coordinates (Angstroms) |           |           |
|------------------|------------------|----------------|-------------------------|-----------|-----------|
|                  |                  |                | X                       | Y         | Z         |
| 1                | 6                | 0              | 2.337582                | 0.567817  | -0.132431 |
| 2                | 1                | 0              | 2.314118                | 1.638337  | 0.051419  |
| 3                | 6                | 0              | 1.204308                | -0.145166 | -0.226290 |
| 4                | 1                | 0              | 1.285864                | -1.211463 | -0.425271 |
| 5                | 6                | 0              | -0.132586               | 0.365299  | -0.074902 |
| 6                | 1                | 0              | -0.246410               | 1.421139  | 0.134061  |
| 7                | 6                | 0              | -1.217443               | -0.440276 | -0.188105 |
| 8                | 1                | 0              | -1.061495               | -1.498897 | -0.364515 |
| 9                | 6                | 0              | 3.692160                | -0.025596 | -0.285724 |
| 10               | 8                | 0              | 4.367514                | -0.442588 | 0.627951  |
| 11               | 1                | 0              | 4.100265                | -0.063097 | -1.316781 |
| 12               | 7                | 0              | -2.531872               | -0.083946 | -0.137682 |
| 13               | 6                | 0              | -2.895698               | 1.284200  | 0.172831  |
| 14               | 1                | 0              | -3.959498               | 1.421384  | -0.009605 |
| 15               | 1                | 0              | -2.685088               | 1.542880  | 1.218042  |
| 16               | 1                | 0              | -2.346633               | 1.973671  | -0.467713 |

|    |   |   |           |           |           |
|----|---|---|-----------|-----------|-----------|
| 17 | 6 | 0 | -3.528569 | -1.102364 | 0.147296  |
| 18 | 1 | 0 | -3.711467 | -1.213291 | 1.223007  |
| 19 | 1 | 0 | -4.471073 | -0.844321 | -0.335405 |
| 20 | 1 | 0 | -3.194113 | -2.061491 | -0.243135 |

## TS1b

Standard orientation:

| Center<br>Number | Atomic<br>Number | Atomic<br>Type | Coordinates (Angstroms) |           |           |
|------------------|------------------|----------------|-------------------------|-----------|-----------|
|                  |                  |                | X                       | Y         | Z         |
| 1                | 6                | 0              | 2.374442                | 0.769849  | 0.034874  |
| 2                | 1                | 0              | 2.306348                | 1.850644  | 0.080158  |
| 3                | 6                | 0              | 1.249373                | 0.003713  | -0.007419 |
| 4                | 1                | 0              | 1.400728                | -1.071448 | -0.054011 |
| 5                | 6                | 0              | -0.088533               | 0.466151  | 0.005984  |
| 6                | 1                | 0              | -0.268083               | 1.532054  | 0.056736  |
| 7                | 6                | 0              | -1.134861               | -0.415670 | -0.040126 |
| 8                | 1                | 0              | -0.912416               | -1.475976 | -0.063726 |
| 9                | 6                | 0              | 3.700835                | 0.198110  | 0.021343  |
| 10               | 8                | 0              | 3.978929                | -0.996274 | -0.027358 |
| 11               | 1                | 0              | 4.522460                | 0.939813  | 0.059427  |
| 12               | 7                | 0              | -2.447234               | -0.126233 | -0.072008 |
| 13               | 6                | 0              | -2.908617               | 1.250405  | -0.018838 |
| 14               | 1                | 0              | -3.969955               | 1.279715  | -0.251399 |
| 15               | 1                | 0              | -2.755305               | 1.688789  | 0.971931  |
| 16               | 1                | 0              | -2.377594               | 1.857472  | -0.751781 |
| 17               | 6                | 0              | -3.446899               | -1.172913 | 0.066696  |
| 18               | 1                | 0              | -3.923194               | -1.138957 | 1.050850  |
| 19               | 1                | 0              | -4.220185               | -1.060260 | -0.694257 |
| 20               | 1                | 0              | -2.978048               | -2.145889 | -0.056110 |

## TS1c

Standard orientation:

| Center<br>Number | Atomic<br>Number | Atomic<br>Type | Coordinates (Angstroms) |           |           |
|------------------|------------------|----------------|-------------------------|-----------|-----------|
|                  |                  |                | X                       | Y         | Z         |
| 1                | 6                | 0              | 2.334190                | 0.521190  | 0.263933  |
| 2                | 1                | 0              | 2.311145                | 1.605595  | 0.326523  |
| 3                | 6                | 0              | 1.202612                | -0.191430 | 0.148903  |
| 4                | 1                | 0              | 1.283684                | -1.274938 | 0.097239  |
| 5                | 6                | 0              | -0.131776               | 0.342881  | 0.080292  |
| 6                | 1                | 0              | -0.245157               | 1.418345  | 0.124969  |
| 7                | 6                | 0              | -1.214018               | -0.463897 | -0.049548 |
| 8                | 1                | 0              | -1.061926               | -1.537548 | -0.065017 |
| 9                | 6                | 0              | 3.685457                | -0.095038 | 0.332425  |
| 10               | 8                | 0              | 4.398013                | -0.297317 | -0.624715 |
| 11               | 1                | 0              | 4.053990                | -0.364699 | 1.343679  |
| 12               | 7                | 0              | -2.517004               | -0.095700 | -0.201315 |
| 13               | 6                | 0              | -2.884741               | 1.303942  | -0.124240 |
| 14               | 1                | 0              | -3.917126               | 1.420595  | -0.447249 |
| 15               | 1                | 0              | -2.791272               | 1.702383  | 0.893794  |
| 16               | 1                | 0              | -2.250480               | 1.896091  | -0.783181 |
| 17               | 6                | 0              | -3.563370               | -1.061095 | 0.088696  |
| 18               | 1                | 0              | -3.880814               | -1.025426 | 1.138003  |
| 19               | 1                | 0              | -4.432882               | -0.865604 | -0.538760 |
| 20               | 1                | 0              | -3.204373               | -2.065687 | -0.125838 |

**TS2a**

Standard orientation:

| Center<br>Number | Atomic<br>Number | Atomic<br>Type | Coordinates (Angstroms) |           |           |
|------------------|------------------|----------------|-------------------------|-----------|-----------|
|                  |                  |                | X                       | Y         | Z         |
| 1                | 6                | 0              | 2.201511                | 0.178940  | -0.219953 |
| 2                | 1                | 0              | 2.043563                | 0.462650  | -1.253661 |
| 3                | 6                | 0              | 1.201045                | 0.155537  | 0.669294  |
| 4                | 1                | 0              | 1.455707                | -0.135487 | 1.688980  |
| 5                | 6                | 0              | -0.201058               | 0.528424  | 0.395164  |
| 6                | 1                | 0              | -0.438011               | 1.583171  | 0.469385  |
| 7                | 6                | 0              | -1.145119               | -0.371641 | 0.069854  |
| 8                | 1                | 0              | -0.881882               | -1.423120 | 0.035948  |
| 9                | 6                | 0              | 3.560257                | -0.185828 | 0.175311  |
| 10               | 8                | 0              | 4.520011                | -0.194797 | -0.570064 |
| 11               | 1                | 0              | 3.676014                | -0.469455 | 1.240027  |
| 12               | 7                | 0              | -2.450145               | -0.127405 | -0.287139 |
| 13               | 6                | 0              | -2.954699               | 1.226769  | -0.198021 |
| 14               | 1                | 0              | -3.946906               | 1.269646  | -0.643042 |
| 15               | 1                | 0              | -3.022871               | 1.582616  | 0.839253  |
| 16               | 1                | 0              | -2.303565               | 1.905781  | -0.748575 |
| 17               | 6                | 0              | -3.421594               | -1.185485 | -0.062043 |
| 18               | 1                | 0              | -3.796240               | -1.200223 | 0.969917  |
| 19               | 1                | 0              | -4.270846               | -1.054130 | -0.732151 |
| 20               | 1                | 0              | -2.966090               | -2.151538 | -0.273236 |

**TS2b**

Standard orientation:

| Center<br>Number | Atomic<br>Number | Atomic<br>Type | Coordinates (Angstroms) |           |           |
|------------------|------------------|----------------|-------------------------|-----------|-----------|
|                  |                  |                | X                       | Y         | Z         |
| 1                | 6                | 0              | -2.057127               | 0.136885  | -0.033875 |
| 2                | 1                | 0              | -1.721073               | 1.159161  | -0.160456 |
| 3                | 6                | 0              | -1.198333               | -0.915075 | 0.062657  |
| 4                | 1                | 0              | -1.665920               | -1.890754 | 0.168689  |
| 5                | 6                | 0              | 0.228181                | -0.941938 | 0.045818  |
| 6                | 1                | 0              | 0.694568                | -1.915550 | 0.088993  |
| 7                | 6                | 0              | 1.012927                | 0.177715  | -0.004428 |
| 8                | 1                | 0              | 0.542887                | 1.153133  | 0.004467  |
| 9                | 6                | 0              | -3.477585               | -0.074530 | 0.021958  |
| 10               | 8                | 0              | -4.336267               | 0.797256  | -0.052608 |
| 11               | 1                | 0              | -3.781945               | -1.134964 | 0.141704  |
| 12               | 7                | 0              | 2.354355                | 0.222990  | -0.069520 |
| 13               | 6                | 0              | 3.142455                | -0.997315 | -0.074939 |
| 14               | 1                | 0              | 4.173827                | -0.754587 | -0.316853 |
| 15               | 1                | 0              | 3.119287                | -1.495168 | 0.899146  |
| 16               | 1                | 0              | 2.763256                | -1.690228 | -0.826090 |
| 17               | 6                | 0              | 3.069537                | 1.480651  | 0.077432  |
| 18               | 1                | 0              | 3.575100                | 1.537624  | 1.045541  |
| 19               | 1                | 0              | 3.818206                | 1.583839  | -0.709030 |
| 20               | 1                | 0              | 2.371123                | 2.310159  | 0.003670  |

**TS2c**

Standard orientation:

| Center | Atomic | Atomic | Coordinates (Angstroms) |   |   |
|--------|--------|--------|-------------------------|---|---|
| Number | Number | Type   | X                       | Y | Z |

| Number | Number | Type | X         | Y         | Z         |
|--------|--------|------|-----------|-----------|-----------|
| 1      | 6      | 0    | 2.194469  | -0.347131 | 0.585510  |
| 2      | 1      | 0    | 1.901621  | -0.783185 | 1.533576  |
| 3      | 6      | 0    | 1.295462  | -0.148011 | -0.385416 |
| 4      | 1      | 0    | 1.666180  | 0.290698  | -1.309986 |
| 5      | 6      | 0    | -0.133578 | -0.511778 | -0.309247 |
| 6      | 1      | 0    | -0.381176 | -1.532243 | -0.577539 |
| 7      | 6      | 0    | -1.090790 | 0.356584  | 0.058825  |
| 8      | 1      | 0    | -0.815088 | 1.380527  | 0.285888  |
| 9      | 6      | 0    | 3.614818  | 0.013581  | 0.437290  |
| 10     | 8      | 0    | 4.120887  | 0.496335  | -0.556309 |
| 11     | 1      | 0    | 4.239497  | -0.185368 | 1.328602  |
| 12     | 7      | 0    | -2.431748 | 0.102691  | 0.239155  |
| 13     | 6      | 0    | -2.944871 | -1.202029 | -0.122336 |
| 14     | 1      | 0    | -3.981169 | -1.281773 | 0.200449  |
| 15     | 1      | 0    | -2.902457 | -1.385735 | -1.204877 |
| 16     | 1      | 0    | -2.370182 | -1.981932 | 0.377416  |
| 17     | 6      | 0    | -3.353667 | 1.214895  | 0.073036  |
| 18     | 1      | 0    | -3.603417 | 1.401529  | -0.979839 |
| 19     | 1      | 0    | -4.278020 | 1.010163  | 0.612712  |
| 20     | 1      | 0    | -2.911704 | 2.121131  | 0.484011  |

### TS3a

Standard orientation:

| Center Number | Atomic Number | Atomic Type | Coordinates (Angstroms) |           |           |
|---------------|---------------|-------------|-------------------------|-----------|-----------|
|               |               |             | X                       | Y         | Z         |
| 1             | 6             | 0           | 2.361350                | 0.000001  | -0.381341 |
| 2             | 1             | 0           | 2.421074                | 0.000003  | -1.463358 |
| 3             | 6             | 0           | 1.178595                | -0.000001 | 0.262722  |
| 4             | 1             | 0           | 1.185963                | -0.000003 | 1.349491  |
| 5             | 6             | 0           | -0.112283               | 0.000001  | -0.377169 |
| 6             | 1             | 0           | -0.151307               | 0.000003  | -1.460264 |
| 7             | 6             | 0           | -1.260301               | -0.000001 | 0.310481  |
| 8             | 1             | 0           | -1.238578               | -0.000003 | 1.406197  |
| 9             | 6             | 0           | 3.615013                | -0.000001 | 0.355730  |
| 10            | 8             | 0           | 4.720702                | 0.000000  | -0.153611 |
| 11            | 1             | 0           | 3.508696                | -0.000003 | 1.458664  |
| 12            | 7             | 0           | -2.537020               | 0.000001  | -0.309364 |
| 13            | 6             | 0           | -3.290276               | 1.209627  | 0.033745  |
| 14            | 1             | 0           | -4.241971               | 1.197255  | -0.496672 |
| 15            | 1             | 0           | -3.496743               | 1.288722  | 1.112612  |
| 16            | 1             | 0           | -2.732910               | 2.091098  | -0.277809 |
| 17            | 6             | 0           | -3.290276               | -1.209627 | 0.033741  |
| 18            | 1             | 0           | -3.496744               | -1.288726 | 1.112607  |
| 19            | 1             | 0           | -4.241971               | -1.197252 | -0.496677 |
| 20            | 1             | 0           | -2.732910               | -2.091097 | -0.277816 |

### TS3b = GS

### TS3c

Standard orientation:

| Center Number | Atomic Number | Atomic Type | Coordinates (Angstroms) |           |           |
|---------------|---------------|-------------|-------------------------|-----------|-----------|
|               |               |             | X                       | Y         | Z         |
| 1             | 6             | 0           | -2.224604               | -0.000000 | -0.356800 |

|    |   |   |           |           |           |
|----|---|---|-----------|-----------|-----------|
| 2  | 1 | 0 | -2.160537 | 0.000008  | -1.438686 |
| 3  | 6 | 0 | -1.123142 | -0.000007 | 0.418312  |
| 4  | 1 | 0 | -1.253211 | -0.000014 | 1.497623  |
| 5  | 6 | 0 | 0.233353  | -0.000005 | -0.066089 |
| 6  | 1 | 0 | 0.380284  | -0.000002 | -1.140760 |
| 7  | 6 | 0 | 1.290628  | -0.000004 | 0.758601  |
| 8  | 1 | 0 | 1.122801  | -0.000005 | 1.833867  |
| 9  | 6 | 0 | -3.554637 | -0.000002 | 0.231528  |
| 10 | 8 | 0 | -4.594323 | 0.000007  | -0.401709 |
| 11 | 1 | 0 | -3.575782 | -0.000013 | 1.339136  |
| 12 | 7 | 0 | 2.659728  | -0.000000 | 0.355990  |
| 13 | 6 | 0 | 3.065643  | 1.216823  | -0.346045 |
| 14 | 1 | 0 | 4.149648  | 1.212038  | -0.463422 |
| 15 | 1 | 0 | 2.613087  | 1.315250  | -1.343892 |
| 16 | 1 | 0 | 2.790045  | 2.090800  | 0.242267  |
| 17 | 6 | 0 | 3.065650  | -1.216815 | -0.346057 |
| 18 | 1 | 0 | 2.613100  | -1.315232 | -1.343908 |
| 19 | 1 | 0 | 4.149655  | -1.212026 | -0.463427 |
| 20 | 1 | 0 | 2.790051  | -2.090799 | 0.242243  |

6b, 225 K, dichloromethane, B3LYP/aug-cc-pVTZ

**GS**

Standard orientation:

| Center<br>Number | Atomic<br>Number | Atomic<br>Type | Coordinates (Angstroms) |           |           |
|------------------|------------------|----------------|-------------------------|-----------|-----------|
|                  |                  |                | X                       | Y         | Z         |
| 1                | 6                | 0              | 3.530254                | 0.390523  | -0.017066 |
| 2                | 1                | 0              | 3.540316                | 1.465256  | -0.159839 |
| 3                | 6                | 0              | 2.356752                | -0.308206 | 0.005655  |
| 4                | 1                | 0              | 2.427593                | -1.383694 | 0.155177  |
| 5                | 6                | 0              | 1.056514                | 0.223279  | -0.148559 |
| 6                | 1                | 0              | 0.953118                | 1.288516  | -0.303249 |
| 7                | 6                | 0              | -0.041383               | -0.597053 | -0.105438 |
| 8                | 1                | 0              | 0.126216                | -1.660437 | 0.024643  |
| 9                | 6                | 0              | 4.784171                | -0.276323 | 0.148770  |
| 10               | 8                | 0              | 5.895216                | 0.257171  | 0.145366  |
| 11               | 1                | 0              | 4.710682                | -1.372721 | 0.291586  |
| 12               | 7                | 0              | -1.338555               | -0.265354 | -0.191592 |
| 13               | 6                | 0              | -1.805802               | 1.097381  | -0.432597 |
| 14               | 1                | 0              | -1.046792               | 1.807970  | -0.118120 |
| 15               | 1                | 0              | -1.985932               | 1.237806  | -1.503463 |
| 16               | 6                | 0              | -2.365872               | -1.294629 | -0.352959 |
| 17               | 1                | 0              | -1.970532               | -2.249500 | -0.011892 |
| 18               | 1                | 0              | -2.625515               | -1.387701 | -1.412880 |
| 19               | 6                | 0              | -3.087825               | 1.357320  | 0.350454  |
| 20               | 1                | 0              | -3.511537               | 2.316517  | 0.060052  |
| 21               | 1                | 0              | -2.868900               | 1.378403  | 1.424374  |
| 22               | 6                | 0              | -3.611386               | -0.927652 | 0.440435  |
| 23               | 1                | 0              | -4.416249               | -1.625705 | 0.219102  |
| 24               | 1                | 0              | -3.397926               | -0.961516 | 1.515235  |
| 25               | 8                | 0              | -4.077366               | 0.369884  | 0.083164  |

**TS2a (TSCC(C))**

Standard orientation:

| Center | Atomic | Atomic | Coordinates (Angstroms) |  |  |
|--------|--------|--------|-------------------------|--|--|
|--------|--------|--------|-------------------------|--|--|

| Number | Number | Type | X         | Y         | Z         |
|--------|--------|------|-----------|-----------|-----------|
| 1      | 6      | 0    | 3.375385  | -0.211315 | -0.238389 |
| 2      | 1      | 0    | 3.142425  | -0.598836 | -1.223128 |
| 3      | 6      | 0    | 2.437816  | -0.068959 | 0.707536  |
| 4      | 1      | 0    | 2.763600  | 0.321217  | 1.671700  |
| 5      | 6      | 0    | 1.014679  | -0.434514 | 0.563852  |
| 6      | 1      | 0    | 0.768686  | -1.470619 | 0.764389  |
| 7      | 6      | 0    | 0.069380  | 0.449626  | 0.206934  |
| 8      | 1      | 0    | 0.348788  | 1.485771  | 0.048864  |
| 9      | 6      | 0    | 4.760456  | 0.159339  | 0.029027  |
| 10     | 8      | 0    | 5.671258  | 0.065349  | -0.774826 |
| 11     | 1      | 0    | 4.952842  | 0.550657  | 1.045512  |
| 12     | 7      | 0    | -1.266474 | 0.210627  | -0.042003 |
| 13     | 6      | 0    | -1.819228 | -1.102712 | 0.258419  |
| 14     | 1      | 0    | -1.153636 | -1.870833 | -0.134907 |
| 15     | 1      | 0    | -1.902066 | -1.253021 | 1.344343  |
| 16     | 6      | 0    | -2.191521 | 1.312594  | 0.227441  |
| 17     | 1      | 0    | -1.759013 | 2.238167  | -0.152845 |
| 18     | 1      | 0    | -2.350701 | 1.431462  | 1.308159  |
| 19     | 6      | 0    | -3.184212 | -1.262831 | -0.396275 |
| 20     | 1      | 0    | -3.654270 | -2.185882 | -0.062181 |
| 21     | 1      | 0    | -3.069322 | -1.300319 | -1.486182 |
| 22     | 6      | 0    | -3.527192 | 1.055110  | -0.448420 |
| 23     | 1      | 0    | -4.250669 | 1.815610  | -0.160505 |
| 24     | 1      | 0    | -3.407153 | 1.073885  | -1.538322 |
| 25     | 8      | 0    | -4.068454 | -0.201559 | -0.049127 |

### TS1c (TSCC(O))

Standard orientation:

| Center Number | Atomic Number | Atomic Type | Coordinates (Angstroms) |           |           |
|---------------|---------------|-------------|-------------------------|-----------|-----------|
|               |               |             | X                       | Y         | Z         |
| 1             | 6             | 0           | 3.528185                | 0.591002  | 0.132647  |
| 2             | 1             | 0           | 3.468861                | 1.658550  | -0.060511 |
| 3             | 6             | 0           | 2.420463                | -0.162849 | 0.222263  |
| 4             | 1             | 0           | 2.536666                | -1.222688 | 0.436718  |
| 5             | 6             | 0           | 1.068618                | 0.300193  | 0.048898  |
| 6             | 1             | 0           | 0.923935                | 1.349720  | -0.171882 |
| 7             | 6             | 0           | 0.013855                | -0.543653 | 0.161345  |
| 8             | 1             | 0           | 0.210335                | -1.593517 | 0.351531  |
| 9             | 6             | 0           | 4.900235                | 0.050587  | 0.310430  |
| 10            | 8             | 0           | 5.602357                | -0.349401 | -0.593811 |
| 11            | 1             | 0           | 5.298124                | 0.037134  | 1.344141  |
| 12            | 7             | 0           | -1.318060               | -0.250016 | 0.097889  |
| 13            | 6             | 0           | -1.767863               | 1.081985  | -0.286923 |
| 14            | 1             | 0           | -1.127630               | 1.828268  | 0.180108  |
| 15            | 1             | 0           | -1.700018               | 1.210502  | -1.375239 |
| 16            | 6             | 0           | -2.247357               | -1.322446 | -0.257642 |
| 17            | 1             | 0           | -1.907829               | -2.251203 | 0.199875  |
| 18            | 1             | 0           | -2.266230               | -1.466103 | -1.345845 |
| 19            | 6             | 0           | -3.199994               | 1.309557  | 0.177814  |
| 20            | 1             | 0           | -3.581558               | 2.243032  | -0.231475 |
| 21            | 1             | 0           | -3.229351               | 1.366568  | 1.272488  |
| 22            | 6             | 0           | -3.648478               | -0.990319 | 0.227614  |
| 23            | 1             | 0           | -4.360022               | -1.727480 | -0.139551 |
| 24            | 1             | 0           | -3.676515               | -0.985393 | 1.323852  |
| 25            | 8             | 0           | -4.073398               | 0.276699  | -0.267203 |

### TS3a (TSCN)

Standard orientation:

| Center<br>Number | Atomic<br>Number | Atomic<br>Type | Coordinates (Angstroms) |           |           |
|------------------|------------------|----------------|-------------------------|-----------|-----------|
|                  |                  |                | X                       | Y         | Z         |
| 1                | 6                | 0              | 1.864767                | 3.070052  | -0.000000 |
| 2                | 1                | 0              | 2.850676                | 2.620154  | -0.000000 |
| 3                | 6                | 0              | 0.744510                | 2.319966  | -0.000000 |
| 4                | 1                | 0              | -0.215585               | 2.828742  | -0.000000 |
| 5                | 6                | 0              | 0.716400                | 0.880146  | -0.000000 |
| 6                | 1                | 0              | 1.658993                | 0.345399  | -0.000000 |
| 7                | 6                | 0              | -0.427048               | 0.183637  | 0.000000  |
| 8                | 1                | 0              | -1.385992               | 0.710526  | -0.000000 |
| 9                | 6                | 0              | 1.788685                | 4.518731  | -0.000000 |
| 10               | 8                | 0              | 2.753535                | 5.267477  | -0.000000 |
| 11               | 1                | 0              | 0.763931                | 4.935032  | -0.000000 |
| 12               | 7                | 0              | -0.468732               | -1.233636 | 0.000000  |
| 13               | 6                | 0              | -1.135300               | -1.755793 | 1.206833  |
| 14               | 1                | 0              | -0.593306               | -1.408901 | 2.086522  |
| 15               | 1                | 0              | -2.171609               | -1.390829 | 1.277823  |
| 16               | 6                | 0              | -1.135300               | -1.755793 | -1.206833 |
| 17               | 1                | 0              | -0.593306               | -1.408901 | -2.086522 |
| 18               | 1                | 0              | -2.171609               | -1.390829 | -1.277823 |
| 19               | 6                | 0              | -1.135300               | -3.275081 | 1.174888  |
| 20               | 1                | 0              | -1.691637               | -3.670900 | 2.022750  |
| 21               | 1                | 0              | -0.105402               | -3.647852 | 1.222393  |
| 22               | 6                | 0              | -1.135300               | -3.275081 | -1.174888 |
| 23               | 1                | 0              | -1.691637               | -3.670900 | -2.022750 |
| 24               | 1                | 0              | -0.105402               | -3.647852 | -1.222393 |
| 25               | 8                | 0              | -1.771494               | -3.771495 | 0.000000  |

### TSCN,CC(C)

Standard orientation:

| Center<br>Number | Atomic<br>Number | Atomic<br>Type | Coordinates (Angstroms) |           |           |
|------------------|------------------|----------------|-------------------------|-----------|-----------|
|                  |                  |                | X                       | Y         | Z         |
| 1                | 6                | 0              | 3.420714                | 0.226864  | 0.212421  |
| 2                | 1                | 0              | 3.209008                | 1.259155  | 0.499482  |
| 3                | 6                | 0              | 2.467692                | -0.723993 | 0.202927  |
| 4                | 1                | 0              | 2.761490                | -1.739380 | -0.090524 |
| 5                | 6                | 0              | 1.055593                | -0.515719 | 0.596277  |
| 6                | 1                | 0              | 0.823323                | -0.554642 | 1.664988  |
| 7                | 6                | 0              | 0.055727                | -0.300747 | -0.263949 |
| 8                | 1                | 0              | 0.249923                | -0.255997 | -1.347834 |
| 9                | 6                | 0              | 4.800196                | -0.095904 | -0.174648 |
| 10               | 8                | 0              | 5.716840                | 0.709884  | -0.195992 |
| 11               | 1                | 0              | 4.975812                | -1.159546 | -0.461276 |
| 12               | 7                | 0              | -1.294187               | -0.114655 | 0.162971  |
| 13               | 6                | 0              | -1.814875               | 1.202352  | -0.244008 |
| 14               | 1                | 0              | -1.179476               | 1.982955  | 0.194755  |
| 15               | 1                | 0              | -1.794627               | 1.320412  | -1.346999 |
| 16               | 6                | 0              | -2.174346               | -1.182127 | -0.345203 |
| 17               | 1                | 0              | -1.801995               | -2.148539 | 0.019435  |
| 18               | 1                | 0              | -2.176887               | -1.208894 | -1.454397 |
| 19               | 6                | 0              | -3.245908               | 1.366106  | 0.255577  |
| 20               | 1                | 0              | -3.673828               | 2.308493  | -0.107514 |
| 21               | 1                | 0              | -3.258344               | 1.368125  | 1.359889  |
| 22               | 6                | 0              | -3.596234               | -0.958100 | 0.157594  |



|    |   |   |           |           |           |
|----|---|---|-----------|-----------|-----------|
| 23 | 1 | 0 | -4.278075 | -1.699902 | -0.275945 |
| 24 | 1 | 0 | -3.621498 | -1.047084 | 1.258105  |
| 25 | 8 | 0 | -4.090199 | 0.323247  | -0.233370 |

**TSCN,CC(O)**

Standard orientation:

| Center<br>Number | Atomic<br>Number | Atomic<br>Type | Coordinates (Angstroms) |           |           |
|------------------|------------------|----------------|-------------------------|-----------|-----------|
|                  |                  |                | X                       | Y         | Z         |
| 1                | 6                | 0              | -3.573633               | -0.263384 | 0.559386  |
| 2                | 1                | 0              | -3.503066               | -0.317438 | 1.650725  |
| 3                | 6                | 0              | -2.466415               | -0.185602 | -0.200840 |
| 4                | 1                | 0              | -2.567375               | -0.140616 | -1.289857 |
| 5                | 6                | 0              | -1.112136               | -0.146384 | 0.332673  |
| 6                | 1                | 0              | -0.986941               | -0.185861 | 1.417491  |
| 7                | 6                | 0              | -0.016744               | -0.061961 | -0.441523 |
| 8                | 1                | 0              | -0.118105               | -0.017320 | -1.538556 |
| 9                | 6                | 0              | -4.958972               | -0.290280 | -0.001056 |
| 10               | 8                | 0              | -5.640729               | 0.702235  | -0.164627 |
| 11               | 1                | 0              | -5.372520               | -1.293573 | -0.258625 |
| 12               | 7                | 0              | 1.305664                | -0.024066 | 0.089539  |
| 13               | 6                | 0              | 2.102681                | -1.182308 | -0.354370 |
| 14               | 1                | 0              | 1.599829                | -2.101689 | -0.026737 |
| 15               | 1                | 0              | 2.189371                | -1.211213 | -1.460127 |
| 16               | 6                | 0              | 1.998181                | 1.227507  | -0.268154 |
| 17               | 1                | 0              | 1.418433                | 2.074188  | 0.122155  |
| 18               | 1                | 0              | 2.078911                | 1.342253  | -1.368713 |
| 19               | 6                | 0              | 3.496196                | -1.113324 | 0.260471  |
| 20               | 1                | 0              | 4.125456                | -1.925811 | -0.123086 |
| 21               | 1                | 0              | 3.424568                | -1.202688 | 1.358909  |
| 22               | 6                | 0              | 3.393962                | 1.235687  | 0.344852  |
| 23               | 1                | 0              | 3.949417                | 2.124914  | 0.022529  |
| 24               | 1                | 0              | 3.318143                | 1.239487  | 1.446585  |
| 25               | 8                | 0              | 4.156417                | 0.105780  | -0.081384 |

**7, 215 K, dichloromethane, B3LYP/aug-cc-pVDZ**

**GS**

Standard orientation:

| Center<br>Number | Atomic<br>Number | Atomic<br>Type | Coordinates (Angstroms) |           |           |
|------------------|------------------|----------------|-------------------------|-----------|-----------|
|                  |                  |                | X                       | Y         | Z         |
| 1                | 6                | 0              | 6.234346                | -0.646657 | -0.000039 |
| 2                | 6                | 0              | 5.160769                | 1.989506  | -0.000019 |
| 3                | 6                | 0              | 7.076279                | 0.474080  | -0.000038 |
| 4                | 6                | 0              | 4.857894                | -0.428266 | -0.000030 |
| 5                | 6                | 0              | 4.327822                | 0.872118  | -0.000020 |
| 6                | 6                | 0              | 6.546130                | 1.775395  | -0.000028 |
| 7                | 6                | 0              | 2.828964                | 0.800300  | -0.000012 |
| 8                | 6                | 0              | 2.478908                | -0.632881 | -0.000017 |
| 9                | 6                | 0              | 3.731494                | -1.416489 | -0.000029 |
| 10               | 6                | 0              | 1.227344                | -1.212270 | -0.000013 |
| 11               | 6                | 0              | -0.025252               | -0.549409 | -0.000002 |
| 12               | 6                | 0              | -1.202536               | -1.264186 | 0.000002  |
| 13               | 6                | 0              | -2.544819               | -0.752793 | 0.000012  |
| 14               | 6                | 0              | -5.261930               | 0.166263  | 0.000030  |
| 15               | 6                | 0              | -2.859562               | 0.631457  | 0.000020  |

|    |   |   |           |           |           |
|----|---|---|-----------|-----------|-----------|
| 16 | 6 | 0 | -3.637546 | -1.655805 | 0.000013  |
| 17 | 6 | 0 | -4.952366 | -1.224927 | 0.000022  |
| 18 | 6 | 0 | -4.165043 | 1.081824  | 0.000029  |
| 19 | 8 | 0 | 3.850237  | -2.641080 | -0.000036 |
| 20 | 8 | 0 | 2.072371  | 1.771891  | -0.000002 |
| 21 | 7 | 0 | -6.551937 | 0.608313  | 0.000039  |
| 22 | 6 | 0 | -7.657712 | -0.343886 | 0.000040  |
| 23 | 6 | 0 | -6.846108 | 2.038009  | 0.000047  |
| 24 | 1 | 0 | 6.640786  | -1.657496 | -0.000046 |
| 25 | 1 | 0 | 4.746048  | 2.997012  | -0.000011 |
| 26 | 1 | 0 | 8.158023  | 0.338024  | -0.000044 |
| 27 | 1 | 0 | 7.225034  | 2.628534  | -0.000027 |
| 28 | 1 | 0 | 1.211837  | -2.307190 | -0.000018 |
| 29 | 1 | 0 | -0.025517 | 0.539347  | 0.000003  |
| 30 | 1 | 0 | -1.118067 | -2.355525 | -0.000004 |
| 31 | 1 | 0 | -2.058364 | 1.369383  | 0.000020  |
| 32 | 1 | 0 | -3.435720 | -2.727996 | 0.000007  |
| 33 | 1 | 0 | -5.746637 | -1.965860 | 0.000023  |
| 34 | 1 | 0 | -4.347045 | 2.152643  | 0.000035  |
| 35 | 1 | 0 | -7.633871 | -0.986433 | 0.893031  |
| 36 | 1 | 0 | -7.633880 | -0.986424 | -0.892958 |
| 37 | 1 | 0 | -8.600699 | 0.207415  | 0.000048  |
| 38 | 1 | 0 | -6.436051 | 2.532721  | 0.893179  |
| 39 | 1 | 0 | -7.929585 | 2.176148  | 0.000053  |
| 40 | 1 | 0 | -6.436060 | 2.532729  | -0.893085 |

## TS, C-Car1

Standard orientation:

| Center<br>Number | Atomic<br>Number | Atomic<br>Type | Coordinates (Angstroms) |           |           |
|------------------|------------------|----------------|-------------------------|-----------|-----------|
|                  |                  |                | X                       | Y         | Z         |
| 1                | 6                | 0              | 6.224759                | 0.477270  | -0.000004 |
| 2                | 6                | 0              | 5.007354                | -2.098064 | 0.000016  |
| 3                | 6                | 0              | 7.001347                | -0.686787 | 0.000005  |
| 4                | 6                | 0              | 4.836650                | 0.334796  | -0.000002 |
| 5                | 6                | 0              | 4.235617                | -0.935529 | 0.000008  |
| 6                | 6                | 0              | 6.399786                | -1.958920 | 0.000015  |
| 7                | 6                | 0              | 2.746733                | -0.792320 | 0.000007  |
| 8                | 6                | 0              | 2.468239                | 0.670346  | -0.000004 |
| 9                | 6                | 0              | 3.775860                | 1.385577  | -0.000010 |
| 10               | 6                | 0              | 1.267881                | 1.314048  | -0.000009 |
| 11               | 6                | 0              | -0.040309               | 0.708126  | -0.000004 |
| 12               | 6                | 0              | -1.162410               | 1.466377  | -0.000011 |
| 13               | 6                | 0              | -2.545002               | 0.924985  | -0.000007 |
| 14               | 6                | 0              | -5.225833               | -0.084848 | -0.000000 |
| 15               | 6                | 0              | -3.225987               | 0.665293  | 1.200046  |
| 16               | 6                | 0              | -3.225986               | 0.665274  | -1.200056 |
| 17               | 6                | 0              | -4.528651               | 0.167057  | -1.208321 |
| 18               | 6                | 0              | -4.528651               | 0.167076  | 1.208317  |
| 19               | 8                | 0              | 3.953761                | 2.598123  | -0.000020 |
| 20               | 8                | 0              | 1.939161                | -1.715043 | 0.000015  |
| 21               | 7                | 0              | -6.534844               | -0.539270 | 0.000003  |
| 22               | 6                | 0              | -7.127970               | -1.003391 | -1.246228 |
| 23               | 6                | 0              | -7.127973               | -1.003367 | 1.246241  |
| 24               | 1                | 0              | 6.685746                | 1.464139  | -0.000012 |
| 25               | 1                | 0              | 4.538086                | -3.081028 | 0.000024  |
| 26               | 1                | 0              | 8.088845                | -0.611548 | 0.000004  |
| 27               | 1                | 0              | 7.031847                | -2.847086 | 0.000021  |
| 28               | 1                | 0              | 1.305230                | 2.408111  | -0.000018 |
| 29               | 1                | 0              | -0.107425               | -0.379309 | 0.000004  |

|    |   |   |           |           |           |
|----|---|---|-----------|-----------|-----------|
| 30 | 1 | 0 | -1.046885 | 2.556614  | -0.000020 |
| 31 | 1 | 0 | -2.727369 | 0.846759  | 2.152919  |
| 32 | 1 | 0 | -2.727368 | 0.846726  | -2.152932 |
| 33 | 1 | 0 | -4.998265 | -0.027090 | -2.168783 |
| 34 | 1 | 0 | -4.998266 | -0.027056 | 2.168782  |
| 35 | 1 | 0 | -6.595172 | -1.872377 | -1.672772 |
| 36 | 1 | 0 | -7.136990 | -0.203265 | -1.998808 |
| 37 | 1 | 0 | -8.166016 | -1.292893 | -1.058712 |
| 38 | 1 | 0 | -6.595180 | -1.872348 | 1.672801  |
| 39 | 1 | 0 | -8.166021 | -1.292867 | 1.058730  |
| 40 | 1 | 0 | -7.136990 | -0.203228 | 1.998807  |

### TS, C-C3

Standard orientation:

| Center<br>Number | Atomic<br>Number | Atomic<br>Type | Coordinates (Angstroms) |           |           |
|------------------|------------------|----------------|-------------------------|-----------|-----------|
|                  |                  |                | X                       | Y         | Z         |
| 1                | 6                | 0              | -6.119758               | 0.248577  | 0.330276  |
| 2                | 6                | 0              | -4.637578               | -2.158734 | -0.022676 |
| 3                | 6                | 0              | -6.746807               | -0.999269 | 0.395400  |
| 4                | 6                | 0              | -4.744453               | 0.275953  | 0.088702  |
| 5                | 6                | 0              | -4.012602               | -0.911695 | -0.085572 |
| 6                | 6                | 0              | -6.013981               | -2.189028 | 0.221605  |
| 7                | 6                | 0              | -2.572835               | -0.595987 | -0.331693 |
| 8                | 6                | 0              | -2.457768               | 0.896006  | -0.271799 |
| 9                | 6                | 0              | -3.831198               | 1.447892  | -0.028554 |
| 10               | 6                | 0              | -1.365244               | 1.675179  | -0.408672 |
| 11               | 6                | 0              | 0.027361                | 1.238993  | -0.631785 |
| 12               | 6                | 0              | 0.912083                | 1.016477  | 0.358709  |
| 13               | 6                | 0              | 2.320467                | 0.626524  | 0.226523  |
| 14               | 6                | 0              | 5.091755                | -0.121990 | 0.083375  |
| 15               | 6                | 0              | 2.958447                | 0.388821  | -1.008122 |
| 16               | 6                | 0              | 3.106368                | 0.465538  | 1.383151  |
| 17               | 6                | 0              | 4.449271                | 0.100380  | 1.327560  |
| 18               | 6                | 0              | 4.296714                | 0.023484  | -1.086603 |
| 19               | 8                | 0              | -4.141900               | 2.627458  | 0.060068  |
| 20               | 8                | 0              | -1.689391               | -1.409518 | -0.558586 |
| 21               | 7                | 0              | 6.429649                | -0.453055 | 0.007813  |
| 22               | 6                | 0              | 7.166059                | -0.756790 | 1.226177  |
| 23               | 6                | 0              | 7.006285                | -0.852164 | -1.268280 |
| 24               | 1                | 0              | -6.682654               | 1.171489  | 0.463277  |
| 25               | 1                | 0              | -4.067378               | -3.076746 | -0.158221 |
| 26               | 1                | 0              | -7.819005               | -1.056744 | 0.583222  |
| 27               | 1                | 0              | -6.531948               | -3.146466 | 0.279049  |
| 28               | 1                | 0              | -1.551924               | 2.756364  | -0.366240 |
| 29               | 1                | 0              | 0.326944                | 1.153874  | -1.680694 |
| 30               | 1                | 0              | 0.563523                | 1.132240  | 1.389235  |
| 31               | 1                | 0              | 2.399386                | 0.485418  | -1.939099 |
| 32               | 1                | 0              | 2.650393                | 0.628894  | 2.361375  |
| 33               | 1                | 0              | 4.995427                | -0.012244 | 2.260207  |
| 34               | 1                | 0              | 4.727431                | -0.153366 | -2.068529 |
| 35               | 1                | 0              | 6.758158                | -1.635145 | 1.756723  |
| 36               | 1                | 0              | 7.153662                | 0.097521  | 1.917720  |
| 37               | 1                | 0              | 8.208823                | -0.962900 | 0.969404  |
| 38               | 1                | 0              | 6.536050                | -1.764183 | -1.675906 |
| 39               | 1                | 0              | 8.073194                | -1.047655 | -1.129707 |
| 40               | 1                | 0              | 6.907180                | -0.051498 | -2.014677 |

## TS, C-N1

Standard orientation:

| Center<br>Number | Atomic<br>Number | Atomic<br>Type | Coordinates (Angstroms) |           |           |
|------------------|------------------|----------------|-------------------------|-----------|-----------|
|                  |                  |                | X                       | Y         | Z         |
| 1                | 6                | 0              | -6.232374               | 0.683091  | -0.000005 |
| 2                | 6                | 0              | -5.186776               | -1.966085 | 0.000087  |
| 3                | 6                | 0              | -7.084398               | -0.427904 | 0.000038  |
| 4                | 6                | 0              | -4.857198               | 0.449876  | -0.000002 |
| 5                | 6                | 0              | -4.340990               | -0.856979 | 0.000044  |
| 6                | 6                | 0              | -6.567911               | -1.736201 | 0.000084  |
| 7                | 6                | 0              | -2.844754               | -0.808302 | 0.000036  |
| 8                | 6                | 0              | -2.473923               | 0.628598  | -0.000018 |
| 9                | 6                | 0              | -3.726530               | 1.427756  | -0.000042 |
| 10               | 6                | 0              | -1.226935               | 1.192582  | -0.000043 |
| 11               | 6                | 0              | 0.026029                | 0.503524  | -0.000021 |
| 12               | 6                | 0              | 1.203316                | 1.194593  | -0.000051 |
| 13               | 6                | 0              | 2.551361                | 0.644842  | -0.000033 |
| 14               | 6                | 0              | 5.217341                | -0.317948 | -0.000003 |
| 15               | 6                | 0              | 2.821724                | -0.741771 | 0.000021  |
| 16               | 6                | 0              | 3.648204                | 1.534257  | -0.000072 |
| 17               | 6                | 0              | 4.959193                | 1.062777  | -0.000057 |
| 18               | 6                | 0              | 4.132348                | -1.209830 | 0.000035  |
| 19               | 8                | 0              | -3.825811               | 2.650760  | -0.000087 |
| 20               | 8                | 0              | -2.098193               | -1.783436 | 0.000068  |
| 21               | 7                | 0              | 6.554125                | -0.855698 | 0.000015  |
| 22               | 6                | 0              | 7.304430                | -0.523109 | 1.215368  |
| 23               | 6                | 0              | 7.304430                | -0.523194 | -1.215361 |
| 24               | 1                | 0              | -6.627829               | 1.698088  | -0.000041 |
| 25               | 1                | 0              | -4.782771               | -2.977708 | 0.000123  |
| 26               | 1                | 0              | -8.164585               | -0.280991 | 0.000036  |
| 27               | 1                | 0              | -7.256576               | -2.581307 | 0.000117  |
| 28               | 1                | 0              | -1.194291               | 2.286819  | -0.000083 |
| 29               | 1                | 0              | 0.004642                | -0.584897 | 0.000019  |
| 30               | 1                | 0              | 1.145626                | 2.286972  | -0.000092 |
| 31               | 1                | 0              | 2.003252                | -1.459987 | 0.000051  |
| 32               | 1                | 0              | 3.462098                | 2.609054  | -0.000113 |
| 33               | 1                | 0              | 5.784796                | 1.773859  | -0.000087 |
| 34               | 1                | 0              | 4.337681                | -2.279635 | 0.000077  |
| 35               | 1                | 0              | 6.723749                | -0.815917 | 2.098324  |
| 36               | 1                | 0              | 7.551506                | 0.553756  | 1.298282  |
| 37               | 1                | 0              | 8.245545                | -1.088880 | 1.216713  |
| 38               | 1                | 0              | 8.245543                | -1.088969 | -1.216667 |
| 39               | 1                | 0              | 7.551511                | 0.553664  | -1.298348 |
| 40               | 1                | 0              | 6.723748                | -0.816061 | -2.098296 |

## TS, C-N2

Standard orientation:

| Center<br>Number | Atomic<br>Number | Atomic<br>Type | Coordinates (Angstroms) |           |           |
|------------------|------------------|----------------|-------------------------|-----------|-----------|
|                  |                  |                | X                       | Y         | Z         |
| 1                | 6                | 0              | -6.215836               | 0.555765  | -0.000002 |
| 2                | 6                | 0              | -5.064846               | -2.049282 | -0.000001 |
| 3                | 6                | 0              | -7.022675               | -0.588478 | -0.000003 |
| 4                | 6                | 0              | -4.832439               | 0.377909  | 0.000000  |
| 5                | 6                | 0              | -4.264180               | -0.907159 | 0.000000  |
| 6                | 6                | 0              | -6.454084               | -1.874973 | -0.000002 |
| 7                | 6                | 0              | -2.771125               | -0.798326 | 0.000002  |

|    |   |   |           |           |           |
|----|---|---|-----------|-----------|-----------|
| 8  | 6 | 0 | -2.458305 | 0.652264  | 0.000002  |
| 9  | 6 | 0 | -3.741990 | 1.400459  | 0.000001  |
| 10 | 6 | 0 | -1.234669 | 1.265382  | 0.000002  |
| 11 | 6 | 0 | 0.044276  | 0.625902  | 0.000002  |
| 12 | 6 | 0 | 1.194042  | 1.361970  | 0.000001  |
| 13 | 6 | 0 | 2.562060  | 0.864334  | 0.000000  |
| 14 | 6 | 0 | 5.262820  | 0.003585  | -0.000002 |
| 15 | 6 | 0 | 2.884464  | -0.512533 | 0.000005  |
| 16 | 6 | 0 | 3.623773  | 1.793308  | -0.000006 |
| 17 | 6 | 0 | 4.952466  | 1.369124  | -0.000007 |
| 18 | 6 | 0 | 4.209728  | -0.932482 | 0.000005  |
| 19 | 8 | 0 | -3.890601 | 2.618446  | 0.000001  |
| 20 | 8 | 0 | -1.985898 | -1.742670 | 0.000003  |
| 21 | 7 | 0 | 6.647644  | -0.393850 | -0.000003 |
| 22 | 6 | 0 | 7.035087  | -1.117723 | -1.215195 |
| 23 | 6 | 0 | 7.035093  | -1.117708 | 1.215196  |
| 24 | 1 | 0 | -6.651443 | 1.554157  | -0.000002 |
| 25 | 1 | 0 | -4.620784 | -3.043975 | -0.000001 |
| 26 | 1 | 0 | -8.107895 | -0.484981 | -0.000004 |
| 27 | 1 | 0 | -7.108257 | -2.747040 | -0.000003 |
| 28 | 1 | 0 | -1.245110 | 2.360017  | 0.000001  |
| 29 | 1 | 0 | 0.064941  | -0.462505 | 0.000003  |
| 30 | 1 | 0 | 1.094901  | 2.451403  | -0.000001 |
| 31 | 1 | 0 | 2.092243  | -1.259741 | 0.000010  |
| 32 | 1 | 0 | 3.398993  | 2.860520  | -0.000009 |
| 33 | 1 | 0 | 5.766804  | 2.092680  | -0.000012 |
| 34 | 1 | 0 | 4.431208  | -1.999337 | 0.000009  |
| 35 | 1 | 0 | 6.755064  | -0.531203 | -2.098419 |
| 36 | 1 | 0 | 6.569952  | -2.119940 | -1.296438 |
| 37 | 1 | 0 | 8.125437  | -1.248120 | -1.217436 |
| 38 | 1 | 0 | 8.125442  | -1.248104 | 1.217434  |
| 39 | 1 | 0 | 6.569959  | -2.119925 | 1.296451  |
| 40 | 1 | 0 | 6.755071  | -0.531180 | 2.098414  |

## TS, C-Car, C-N

Standard orientation:

| Center<br>Number | Atomic<br>Number | Atomic<br>Type | Coordinates (Angstroms) |           |           |
|------------------|------------------|----------------|-------------------------|-----------|-----------|
|                  |                  |                | X                       | Y         | Z         |
| 1                | 6                | 0              | -6.209368               | -0.507963 | -0.083709 |
| 2                | 6                | 0              | -5.007892               | 2.071558  | 0.051439  |
| 3                | 6                | 0              | -6.992731               | 0.650855  | -0.048365 |
| 4                | 6                | 0              | -4.822326               | -0.358311 | -0.050615 |
| 5                | 6                | 0              | -4.229149               | 0.914135  | 0.016138  |
| 6                | 6                | 0              | -6.399037               | 1.925067  | 0.018354  |
| 7                | 6                | 0              | -2.740162               | 0.779637  | 0.038707  |
| 8                | 6                | 0              | -2.452256               | -0.680904 | -0.019201 |
| 9                | 6                | 0              | -3.756025               | -1.402620 | -0.075815 |
| 10               | 6                | 0              | -1.248936               | -1.317075 | -0.022579 |
| 11               | 6                | 0              | 0.054336                | -0.700717 | 0.030546  |
| 12               | 6                | 0              | 1.182227                | -1.447867 | 0.022783  |
| 13               | 6                | 0              | 2.558306                | -0.888497 | 0.075761  |
| 14               | 6                | 0              | 5.185278                | 0.155705  | 0.174961  |
| 15               | 6                | 0              | 3.199777                | -0.679539 | 1.306522  |
| 16               | 6                | 0              | 3.249610                | -0.575232 | -1.106631 |
| 17               | 6                | 0              | 4.546264                | -0.057319 | -1.056531 |
| 18               | 6                | 0              | 4.497995                | -0.161178 | 1.352162  |
| 19               | 8                | 0              | -3.925457               | -2.614740 | -0.132018 |
| 20               | 8                | 0              | -1.937881               | 1.705005  | 0.094158  |
| 21               | 7                | 0              | 6.523007                | 0.690055  | 0.271869  |

|    |   |   |           |           |           |
|----|---|---|-----------|-----------|-----------|
| 22 | 6 | 0 | 6.631774  | 2.059620  | -0.237866 |
| 23 | 6 | 0 | 7.536851  | -0.191733 | -0.312658 |
| 24 | 1 | 0 | -6.664214 | -1.496298 | -0.135494 |
| 25 | 1 | 0 | -4.544743 | 3.056043  | 0.103054  |
| 26 | 1 | 0 | -8.079532 | 0.570032  | -0.072767 |
| 27 | 1 | 0 | -7.036435 | 2.809001  | 0.044413  |
| 28 | 1 | 0 | -1.277674 | -2.410232 | -0.070188 |
| 29 | 1 | 0 | 0.110293  | 0.386315  | 0.077959  |
| 30 | 1 | 0 | 1.087859  | -2.538110 | -0.025170 |
| 31 | 1 | 0 | 2.680773  | -0.918407 | 2.234975  |
| 32 | 1 | 0 | 2.767658  | -0.733105 | -2.071819 |
| 33 | 1 | 0 | 5.058795  | 0.183565  | -1.987865 |
| 34 | 1 | 0 | 4.990969  | 0.005673  | 2.309563  |
| 35 | 1 | 0 | 5.878124  | 2.693243  | 0.245044  |
| 36 | 1 | 0 | 6.498746  | 2.131519  | -1.335824 |
| 37 | 1 | 0 | 7.626477  | 2.454510  | 0.009232  |
| 38 | 1 | 0 | 8.533807  | 0.197631  | -0.065844 |
| 39 | 1 | 0 | 7.465323  | -0.272837 | -1.415775 |
| 40 | 1 | 0 | 7.442203  | -1.196773 | 0.115896  |

## TS, C-C, CN

Standard orientation:

| Center<br>Number | Atomic<br>Number | Atomic<br>Type | Coordinates (Angstroms) |           |           |
|------------------|------------------|----------------|-------------------------|-----------|-----------|
|                  |                  |                | X                       | Y         | Z         |
| 1                | 6                | 0              | -6.106533               | -0.252714 | 0.379446  |
| 2                | 6                | 0              | -4.633274               | 2.138979  | -0.097672 |
| 3                | 6                | 0              | -6.736660               | 0.995179  | 0.387748  |
| 4                | 6                | 0              | -4.732579               | -0.288222 | 0.131229  |
| 5                | 6                | 0              | -4.005044               | 0.891974  | -0.103960 |
| 6                | 6                | 0              | -6.008352               | 2.177177  | 0.152314  |
| 7                | 6                | 0              | -2.566606               | 0.569114  | -0.343518 |
| 8                | 6                | 0              | -2.448376               | -0.919123 | -0.220726 |
| 9                | 6                | 0              | -3.817950               | -1.462508 | 0.062872  |
| 10               | 6                | 0              | -1.356436               | -1.699713 | -0.343075 |
| 11               | 6                | 0              | 0.028224                | -1.264093 | -0.612015 |
| 12               | 6                | 0              | 0.928832                | -0.991399 | 0.347624  |
| 13               | 6                | 0              | 2.333635                | -0.592726 | 0.154691  |
| 14               | 6                | 0              | 5.054821                | 0.182220  | -0.096659 |
| 15               | 6                | 0              | 2.929166                | -0.432470 | -1.111783 |
| 16               | 6                | 0              | 3.132869                | -0.354933 | 1.289311  |
| 17               | 6                | 0              | 4.470845                | 0.025723  | 1.169013  |
| 18               | 6                | 0              | 4.265256                | -0.052159 | -1.232260 |
| 19               | 8                | 0              | -4.122615               | -2.637281 | 0.211070  |
| 20               | 8                | 0              | -1.683464               | 1.371615  | -0.607319 |
| 21               | 7                | 0              | 6.432256                | 0.575080  | -0.275064 |
| 22               | 6                | 0              | 7.382167                | -0.412987 | 0.243478  |
| 23               | 6                | 0              | 6.715022                | 1.920895  | 0.231381  |
| 24               | 1                | 0              | -6.666061               | -1.169553 | 0.559915  |
| 25               | 1                | 0              | -4.066537               | 3.050780  | -0.280961 |
| 26               | 1                | 0              | -7.807968               | 1.058819  | 0.578503  |
| 27               | 1                | 0              | -6.528950               | 3.134782  | 0.165784  |
| 28               | 1                | 0              | -1.531364               | -2.779397 | -0.253372 |
| 29               | 1                | 0              | 0.306439                | -1.222095 | -1.669249 |
| 30               | 1                | 0              | 0.607956                | -1.060136 | 1.390468  |
| 31               | 1                | 0              | 2.348887                | -0.603644 | -2.017952 |
| 32               | 1                | 0              | 2.695687                | -0.470668 | 2.282322  |
| 33               | 1                | 0              | 5.059448                | 0.201352  | 2.069493  |
| 34               | 1                | 0              | 4.716819                | 0.070284  | -2.216456 |
| 35               | 1                | 0              | 7.158277                | -1.398311 | -0.182857 |

|    |   |   |          |           |           |
|----|---|---|----------|-----------|-----------|
| 36 | 1 | 0 | 7.368134 | -0.497949 | 1.348509  |
| 37 | 1 | 0 | 8.397735 | -0.126219 | -0.061352 |
| 38 | 1 | 0 | 7.729008 | 2.211696  | -0.074806 |
| 39 | 1 | 0 | 6.656712 | 1.996251  | 1.335641  |
| 40 | 1 | 0 | 6.004452 | 2.634472  | -0.202842 |

7, 298 K, dichloromethane, B3LYP/aug-cc-pVDZ

**GS**

Standard orientation:

| Center<br>Number | Atomic<br>Number | Atomic<br>Type | Coordinates (Angstroms) |           |           |
|------------------|------------------|----------------|-------------------------|-----------|-----------|
|                  |                  |                | X                       | Y         | Z         |
| 1                | 6                | 0              | 6.234346                | -0.646657 | -0.000039 |
| 2                | 6                | 0              | 5.160769                | 1.989506  | -0.000019 |
| 3                | 6                | 0              | 7.076279                | 0.474080  | -0.000038 |
| 4                | 6                | 0              | 4.857894                | -0.428266 | -0.000030 |
| 5                | 6                | 0              | 4.327822                | 0.872118  | -0.000020 |
| 6                | 6                | 0              | 6.546130                | 1.775395  | -0.000028 |
| 7                | 6                | 0              | 2.828964                | 0.800300  | -0.000012 |
| 8                | 6                | 0              | 2.478908                | -0.632881 | -0.000017 |
| 9                | 6                | 0              | 3.731494                | -1.416489 | -0.000029 |
| 10               | 6                | 0              | 1.227344                | -1.212270 | -0.000013 |
| 11               | 6                | 0              | -0.025252               | -0.549409 | -0.000002 |
| 12               | 6                | 0              | -1.202536               | -1.264186 | 0.000002  |
| 13               | 6                | 0              | -2.544819               | -0.752793 | 0.000012  |
| 14               | 6                | 0              | -5.261930               | 0.166263  | 0.000030  |
| 15               | 6                | 0              | -2.859562               | 0.631457  | 0.000020  |
| 16               | 6                | 0              | -3.637546               | -1.655805 | 0.000013  |
| 17               | 6                | 0              | -4.952366               | -1.224927 | 0.000022  |
| 18               | 6                | 0              | -4.165043               | 1.081824  | 0.000029  |
| 19               | 8                | 0              | 3.850237                | -2.641080 | -0.000036 |
| 20               | 8                | 0              | 2.072371                | 1.771891  | -0.000002 |
| 21               | 7                | 0              | -6.551937               | 0.608313  | 0.000039  |
| 22               | 6                | 0              | -7.657712               | -0.343886 | 0.000040  |
| 23               | 6                | 0              | -6.846108               | 2.038009  | 0.000047  |
| 24               | 1                | 0              | 6.640786                | -1.657496 | -0.000046 |
| 25               | 1                | 0              | 4.746048                | 2.997012  | -0.000011 |
| 26               | 1                | 0              | 8.158023                | 0.338024  | -0.000044 |
| 27               | 1                | 0              | 7.225034                | 2.628534  | -0.000027 |
| 28               | 1                | 0              | 1.211837                | -2.307190 | -0.000018 |
| 29               | 1                | 0              | -0.025517               | 0.539347  | 0.000003  |
| 30               | 1                | 0              | -1.118067               | -2.355525 | -0.000004 |
| 31               | 1                | 0              | -2.058364               | 1.369383  | 0.000020  |
| 32               | 1                | 0              | -3.435720               | -2.727996 | 0.000007  |
| 33               | 1                | 0              | -5.746637               | -1.965860 | 0.000023  |
| 34               | 1                | 0              | -4.347045               | 2.152643  | 0.000035  |
| 35               | 1                | 0              | -7.633871               | -0.986433 | 0.893031  |
| 36               | 1                | 0              | -7.633880               | -0.986424 | -0.892958 |
| 37               | 1                | 0              | -8.600699               | 0.207415  | 0.000048  |
| 38               | 1                | 0              | -6.436051               | 2.532721  | 0.893179  |
| 39               | 1                | 0              | -7.929585               | 2.176148  | 0.000053  |
| 40               | 1                | 0              | -6.436060               | 2.532729  | -0.893085 |

**TS C-C2**

Standard orientation:

| Center<br>Number | Atomic<br>Number | Atomic<br>Type | Coordinates (Angstroms) |           |           |
|------------------|------------------|----------------|-------------------------|-----------|-----------|
|                  |                  |                | X                       | Y         | Z         |
| 1                | 6                | 0              | 6.122675                | 0.338764  | 0.000000  |
| 2                | 6                | 0              | 4.638245                | -2.089638 | 0.000000  |
| 3                | 6                | 0              | 6.773257                | -0.902996 | -0.000000 |
| 4                | 6                | 0              | 4.729021                | 0.343381  | 0.000001  |
| 5                | 6                | 0              | 3.997223                | -0.852369 | 0.000001  |
| 6                | 6                | 0              | 6.040141                | -2.101695 | -0.000000 |
| 7                | 6                | 0              | 2.528193                | -0.546736 | 0.000001  |
| 8                | 6                | 0              | 2.400622                | 0.921752  | 0.000001  |
| 9                | 6                | 0              | 3.771652                | 1.492532  | 0.000001  |
| 10               | 6                | 0              | 1.309895                | 1.777231  | -0.000000 |
| 11               | 6                | 0              | -0.100979               | 1.604706  | -0.000001 |
| 12               | 6                | 0              | -0.798988               | 0.414203  | -0.000001 |
| 13               | 6                | 0              | -2.226033               | 0.253699  | -0.000001 |
| 14               | 6                | 0              | -5.059423               | -0.204890 | -0.000000 |
| 15               | 6                | 0              | -3.153098               | 1.329779  | -0.000001 |
| 16               | 6                | 0              | -2.772168               | -1.055688 | -0.000001 |
| 17               | 6                | 0              | -4.135253               | -1.290033 | -0.000000 |
| 18               | 6                | 0              | -4.517479               | 1.117725  | -0.000001 |
| 19               | 8                | 0              | 4.083505                | 2.682296  | 0.000001  |
| 20               | 8                | 0              | 1.647063                | -1.409432 | -0.000000 |
| 21               | 7                | 0              | -6.405911               | -0.417009 | 0.000000  |
| 22               | 6                | 0              | -6.938626               | -1.775831 | 0.000001  |
| 23               | 6                | 0              | -7.334900               | 0.709031  | 0.000001  |
| 24               | 1                | 0              | 6.686759                | 1.270863  | 0.000000  |
| 25               | 1                | 0              | 4.066363                | -3.016862 | 0.000000  |
| 26               | 1                | 0              | 7.862781                | -0.942943 | -0.000001 |
| 27               | 1                | 0              | 6.572584                | -3.053141 | -0.000001 |
| 28               | 1                | 0              | 1.622162                | 2.826970  | 0.000001  |
| 29               | 1                | 0              | -0.663231               | 2.539802  | -0.000001 |
| 30               | 1                | 0              | -0.210749               | -0.505063 | -0.000001 |
| 31               | 1                | 0              | -2.793375               | 2.357955  | -0.000002 |
| 32               | 1                | 0              | -2.091270               | -1.907870 | -0.000001 |
| 33               | 1                | 0              | -4.490737               | -2.316396 | -0.000000 |
| 34               | 1                | 0              | -5.179335               | 1.979156  | -0.000001 |
| 35               | 1                | 0              | -6.617249               | -2.332451 | 0.893074  |
| 36               | 1                | 0              | -6.617249               | -2.332452 | -0.893071 |
| 37               | 1                | 0              | -8.029878               | -1.728837 | 0.000002  |
| 38               | 1                | 0              | -7.203762               | 1.337847  | 0.893187  |
| 39               | 1                | 0              | -8.357087               | 0.324176  | 0.000004  |
| 40               | 1                | 0              | -7.203766               | 1.337845  | -0.893186 |

## TS C-N1

Standard orientation:

| Center<br>Number | Atomic<br>Number | Atomic<br>Type | Coordinates (Angstroms) |           |           |
|------------------|------------------|----------------|-------------------------|-----------|-----------|
|                  |                  |                | X                       | Y         | Z         |
| 1                | 6                | 0              | -6.232374               | 0.683091  | -0.000005 |
| 2                | 6                | 0              | -5.186776               | -1.966085 | 0.000087  |
| 3                | 6                | 0              | -7.084398               | -0.427904 | 0.000038  |
| 4                | 6                | 0              | -4.857198               | 0.449876  | -0.000002 |
| 5                | 6                | 0              | -4.340990               | -0.856979 | 0.000044  |
| 6                | 6                | 0              | -6.567911               | -1.736201 | 0.000084  |
| 7                | 6                | 0              | -2.844754               | -0.808302 | 0.000036  |
| 8                | 6                | 0              | -2.473923               | 0.628598  | -0.000018 |
| 9                | 6                | 0              | -3.726530               | 1.427756  | -0.000042 |
| 10               | 6                | 0              | -1.226935               | 1.192582  | -0.000043 |
| 11               | 6                | 0              | 0.026029                | 0.503524  | -0.000021 |



|    |   |   |           |           |           |
|----|---|---|-----------|-----------|-----------|
| 12 | 6 | 0 | 1.203316  | 1.194593  | -0.000051 |
| 13 | 6 | 0 | 2.551361  | 0.644842  | -0.000033 |
| 14 | 6 | 0 | 5.217341  | -0.317948 | -0.000003 |
| 15 | 6 | 0 | 2.821724  | -0.741771 | 0.000021  |
| 16 | 6 | 0 | 3.648204  | 1.534257  | -0.000072 |
| 17 | 6 | 0 | 4.959193  | 1.062777  | -0.000057 |
| 18 | 6 | 0 | 4.132348  | -1.209830 | 0.000035  |
| 19 | 8 | 0 | -3.825811 | 2.650760  | -0.000087 |
| 20 | 8 | 0 | -2.098193 | -1.783436 | 0.000068  |
| 21 | 7 | 0 | 6.554125  | -0.855698 | 0.000015  |
| 22 | 6 | 0 | 7.304430  | -0.523109 | 1.215368  |
| 23 | 6 | 0 | 7.304430  | -0.523194 | -1.215361 |
| 24 | 1 | 0 | -6.627829 | 1.698088  | -0.000041 |
| 25 | 1 | 0 | -4.782771 | -2.977708 | 0.000123  |
| 26 | 1 | 0 | -8.164585 | -0.280991 | 0.000036  |
| 27 | 1 | 0 | -7.256576 | -2.581307 | 0.000117  |
| 28 | 1 | 0 | -1.194291 | 2.286819  | -0.000083 |
| 29 | 1 | 0 | 0.004642  | -0.584897 | 0.000019  |
| 30 | 1 | 0 | 1.145626  | 2.286972  | -0.000092 |
| 31 | 1 | 0 | 2.003252  | -1.459987 | 0.000051  |
| 32 | 1 | 0 | 3.462098  | 2.609054  | -0.000113 |
| 33 | 1 | 0 | 5.784796  | 1.773859  | -0.000087 |
| 34 | 1 | 0 | 4.337681  | -2.279635 | 0.000077  |
| 35 | 1 | 0 | 6.723749  | -0.815917 | 2.098324  |
| 36 | 1 | 0 | 7.551506  | 0.553756  | 1.298282  |
| 37 | 1 | 0 | 8.245545  | -1.088880 | 1.216713  |
| 38 | 1 | 0 | 8.245543  | -1.088969 | -1.216667 |
| 39 | 1 | 0 | 7.551511  | 0.553664  | -1.298348 |
| 40 | 1 | 0 | 6.723748  | -0.816061 | -2.098296 |

## TS C-N2

Standard orientation:

| Center<br>Number | Atomic<br>Number | Atomic<br>Type | Coordinates (Angstroms) |           |           |
|------------------|------------------|----------------|-------------------------|-----------|-----------|
|                  |                  |                | X                       | Y         | Z         |
| 1                | 6                | 0              | -6.215836               | 0.555765  | -0.000002 |
| 2                | 6                | 0              | -5.064846               | -2.049282 | -0.000001 |
| 3                | 6                | 0              | -7.022675               | -0.588478 | -0.000003 |
| 4                | 6                | 0              | -4.832439               | 0.377909  | -0.000000 |
| 5                | 6                | 0              | -4.264180               | -0.907159 | 0.000000  |
| 6                | 6                | 0              | -6.454084               | -1.874973 | -0.000002 |
| 7                | 6                | 0              | -2.771125               | -0.798326 | 0.000002  |
| 8                | 6                | 0              | -2.458305               | 0.652264  | 0.000002  |
| 9                | 6                | 0              | -3.741990               | 1.400459  | 0.000001  |
| 10               | 6                | 0              | -1.234669               | 1.265382  | 0.000002  |
| 11               | 6                | 0              | 0.044276                | 0.625902  | 0.000002  |
| 12               | 6                | 0              | 1.194042                | 1.361970  | 0.000001  |
| 13               | 6                | 0              | 2.562060                | 0.864334  | 0.000000  |
| 14               | 6                | 0              | 5.262820                | 0.003585  | -0.000002 |
| 15               | 6                | 0              | 2.884464                | -0.512533 | 0.000005  |
| 16               | 6                | 0              | 3.623773                | 1.793308  | -0.000006 |
| 17               | 6                | 0              | 4.952466                | 1.369124  | -0.000007 |
| 18               | 6                | 0              | 4.209728                | -0.932482 | 0.000005  |
| 19               | 8                | 0              | -3.890601               | 2.618446  | 0.000001  |
| 20               | 8                | 0              | -1.985898               | -1.742670 | 0.000003  |
| 21               | 7                | 0              | 6.647644                | -0.393850 | -0.000003 |
| 22               | 6                | 0              | 7.035087                | -1.117723 | -1.215195 |
| 23               | 6                | 0              | 7.035093                | -1.117708 | 1.215196  |
| 24               | 1                | 0              | -6.651443               | 1.554157  | -0.000002 |
| 25               | 1                | 0              | -4.620784               | -3.043975 | -0.000001 |

|    |   |   |           |           |           |
|----|---|---|-----------|-----------|-----------|
| 26 | 1 | 0 | -8.107895 | -0.484981 | -0.000004 |
| 27 | 1 | 0 | -7.108257 | -2.747040 | -0.000003 |
| 28 | 1 | 0 | -1.245110 | 2.360017  | 0.000001  |
| 29 | 1 | 0 | 0.064941  | -0.462505 | 0.000003  |
| 30 | 1 | 0 | 1.094901  | 2.451403  | -0.000001 |
| 31 | 1 | 0 | 2.092243  | -1.259741 | 0.000010  |
| 32 | 1 | 0 | 3.398993  | 2.860520  | -0.000009 |
| 33 | 1 | 0 | 5.766804  | 2.092680  | -0.000012 |
| 34 | 1 | 0 | 4.431208  | -1.999337 | 0.000009  |
| 35 | 1 | 0 | 6.755064  | -0.531203 | -2.098419 |
| 36 | 1 | 0 | 6.569952  | -2.119940 | -1.296438 |
| 37 | 1 | 0 | 8.125437  | -1.248120 | -1.217436 |
| 38 | 1 | 0 | 8.125442  | -1.248104 | 1.217434  |
| 39 | 1 | 0 | 6.569959  | -2.119925 | 1.296451  |
| 40 | 1 | 0 | 6.755071  | -0.531180 | 2.098414  |

## TS C-CAr1

Standard orientation:

| Center Number | Atomic Number | Atomic Type | Coordinates (Angstroms) |           |           |
|---------------|---------------|-------------|-------------------------|-----------|-----------|
|               |               |             | X                       | Y         | Z         |
| 1             | 6             | 0           | 6.224759                | 0.477270  | -0.000004 |
| 2             | 6             | 0           | 5.007354                | -2.098064 | 0.000016  |
| 3             | 6             | 0           | 7.001347                | -0.686787 | 0.000005  |
| 4             | 6             | 0           | 4.836650                | 0.334796  | -0.000002 |
| 5             | 6             | 0           | 4.235617                | -0.935529 | 0.000008  |
| 6             | 6             | 0           | 6.399786                | -1.958920 | 0.000015  |
| 7             | 6             | 0           | 2.746733                | -0.792320 | 0.000007  |
| 8             | 6             | 0           | 2.468239                | 0.670346  | -0.000004 |
| 9             | 6             | 0           | 3.775860                | 1.385577  | -0.000010 |
| 10            | 6             | 0           | 1.267881                | 1.314048  | -0.000009 |
| 11            | 6             | 0           | -0.040309               | 0.708126  | -0.000004 |
| 12            | 6             | 0           | -1.162410               | 1.466377  | -0.000011 |
| 13            | 6             | 0           | -2.545002               | 0.924985  | -0.000007 |
| 14            | 6             | 0           | -5.225833               | -0.084848 | 0.000000  |
| 15            | 6             | 0           | -3.225987               | 0.665293  | 1.200046  |
| 16            | 6             | 0           | -3.225986               | 0.665274  | -1.200056 |
| 17            | 6             | 0           | -4.528651               | 0.167057  | -1.208321 |
| 18            | 6             | 0           | -4.528651               | 0.167076  | 1.208317  |
| 19            | 8             | 0           | 3.953761                | 2.598123  | -0.000020 |
| 20            | 8             | 0           | 1.939161                | -1.715043 | 0.000015  |
| 21            | 7             | 0           | -6.534844               | -0.539270 | 0.000003  |
| 22            | 6             | 0           | -7.127970               | -1.003391 | -1.246228 |
| 23            | 6             | 0           | -7.127973               | -1.003367 | 1.246241  |
| 24            | 1             | 0           | 6.685746                | 1.464139  | -0.000012 |
| 25            | 1             | 0           | 4.538086                | -3.081028 | 0.000024  |
| 26            | 1             | 0           | 8.088845                | -0.611548 | 0.000004  |
| 27            | 1             | 0           | 7.031847                | -2.847086 | 0.000021  |
| 28            | 1             | 0           | 1.305230                | 2.408111  | -0.000018 |
| 29            | 1             | 0           | -0.107425               | -0.379309 | 0.000004  |
| 30            | 1             | 0           | -1.046885               | 2.556614  | -0.000020 |
| 31            | 1             | 0           | -2.727369               | 0.846759  | 2.152919  |
| 32            | 1             | 0           | -2.727368               | 0.846726  | -2.152932 |
| 33            | 1             | 0           | -4.998265               | -0.027090 | -2.168783 |
| 34            | 1             | 0           | -4.998266               | -0.027056 | 2.168782  |
| 35            | 1             | 0           | -6.595172               | -1.872377 | -1.672772 |
| 36            | 1             | 0           | -7.136990               | -0.203265 | -1.998808 |
| 37            | 1             | 0           | -8.166016               | -1.292893 | -1.058712 |
| 38            | 1             | 0           | -6.595180               | -1.872348 | 1.672801  |
| 39            | 1             | 0           | -8.166021               | -1.292867 | 1.058730  |

40 1 0 -7.136990 -0.203228 1.998807

---

## TS C-CAr2

Standard orientation:

---

| Center<br>Number | Atomic<br>Number | Atomic<br>Type | Coordinates (Angstroms) |           |           |
|------------------|------------------|----------------|-------------------------|-----------|-----------|
|                  |                  |                | X                       | Y         | Z         |
| 1                | 6                | 0              | -6.232592               | 0.512846  | -0.000001 |
| 2                | 6                | 0              | -5.043858               | -2.075850 | 0.000001  |
| 3                | 6                | 0              | -7.022060               | -0.642518 | -0.000000 |
| 4                | 6                | 0              | -4.846145               | 0.354964  | -0.000001 |
| 5                | 6                | 0              | -4.259272               | -0.921954 | 0.000001  |
| 6                | 6                | 0              | -6.434657               | -1.921259 | 0.000001  |
| 7                | 6                | 0              | -2.768889               | -0.795326 | 0.000002  |
| 8                | 6                | 0              | -2.474129               | 0.664179  | 0.000001  |
| 9                | 6                | 0              | -3.773732               | 1.393874  | -0.000001 |
| 10               | 6                | 0              | -1.266669               | 1.294464  | -0.000000 |
| 11               | 6                | 0              | 0.034588                | 0.673812  | 0.000000  |
| 12               | 6                | 0              | 1.165393                | 1.419022  | -0.000002 |
| 13               | 6                | 0              | 2.541072                | 0.860138  | -0.000002 |
| 14               | 6                | 0              | 5.202632                | -0.198952 | -0.000000 |
| 15               | 6                | 0              | 3.221840                | 0.599923  | 1.200056  |
| 16               | 6                | 0              | 3.221839                | 0.599917  | -1.200058 |
| 17               | 6                | 0              | 4.518682                | 0.086756  | -1.208377 |
| 18               | 6                | 0              | 4.518683                | 0.086762  | 1.208376  |
| 19               | 8                | 0              | -3.938173               | 2.608317  | -0.000002 |
| 20               | 8                | 0              | -1.971685               | -1.726994 | 0.000003  |
| 21               | 7                | 0              | 6.474318                | -0.748912 | 0.000001  |
| 22               | 6                | 0              | 7.224628                | -0.809407 | -1.246390 |
| 23               | 6                | 0              | 7.224629                | -0.809403 | 1.246391  |
| 24               | 1                | 0              | -6.682576               | 1.504781  | -0.000002 |
| 25               | 1                | 0              | -4.585509               | -3.063954 | 0.000002  |
| 26               | 1                | 0              | -8.108651               | -0.555204 | -0.000001 |
| 27               | 1                | 0              | -7.076499               | -2.802380 | 0.000001  |
| 28               | 1                | 0              | -1.291724               | 2.388873  | -0.000002 |
| 29               | 1                | 0              | 0.089379                | -0.414322 | 0.000003  |
| 30               | 1                | 0              | 1.062796                | 2.510575  | -0.000005 |
| 31               | 1                | 0              | 2.731006                | 0.801501  | 2.152940  |
| 32               | 1                | 0              | 2.731004                | 0.801490  | -2.152943 |
| 33               | 1                | 0              | 4.993901                | -0.093192 | -2.168864 |
| 34               | 1                | 0              | 4.993903                | -0.093180 | 2.168864  |
| 35               | 1                | 0              | 7.417904                | 0.190604  | -1.674957 |
| 36               | 1                | 0              | 6.690873                | -1.407189 | -1.997681 |
| 37               | 1                | 0              | 8.186071                | -1.295982 | -1.058421 |
| 38               | 1                | 0              | 7.417906                | 0.190610  | 1.674954  |
| 39               | 1                | 0              | 8.186070                | -1.295980 | 1.058424  |
| 40               | 1                | 0              | 6.690873                | -1.407180 | 1.997686  |

---

## TS C-C1

Standard orientation:

---

| Center<br>Number | Atomic<br>Number | Atomic<br>Type | Coordinates (Angstroms) |           |           |
|------------------|------------------|----------------|-------------------------|-----------|-----------|
|                  |                  |                | X                       | Y         | Z         |
| 1                | 6                | 0              | -6.125897               | 0.275257  | 0.324784  |
| 2                | 6                | 0              | -4.663906               | -2.142505 | -0.040719 |
| 3                | 6                | 0              | -6.764324               | -0.967367 | 0.378048  |
| 4                | 6                | 0              | -4.749503               | 0.292114  | 0.088534  |

---

|    |   |   |           |           |           |
|----|---|---|-----------|-----------|-----------|
| 5  | 6 | 0 | -4.027572 | -0.900680 | -0.091828 |
| 6  | 6 | 0 | -6.041484 | -2.162288 | 0.197961  |
| 7  | 6 | 0 | -2.584100 | -0.596044 | -0.330148 |
| 8  | 6 | 0 | -2.456466 | 0.894588  | -0.261116 |
| 9  | 6 | 0 | -3.825586 | 1.456734  | -0.017141 |
| 10 | 6 | 0 | -1.357229 | 1.665223  | -0.392505 |
| 11 | 6 | 0 | 0.031341  | 1.217898  | -0.618633 |
| 12 | 6 | 0 | 0.914882  | 0.982477  | 0.369897  |
| 13 | 6 | 0 | 2.319002  | 0.578472  | 0.234348  |
| 14 | 6 | 0 | 5.077866  | -0.213626 | 0.085075  |
| 15 | 6 | 0 | 3.101274  | 0.392499  | 1.389723  |
| 16 | 6 | 0 | 2.959964  | 0.364118  | -1.003012 |
| 17 | 6 | 0 | 4.294021  | -0.015564 | -1.084746 |
| 18 | 6 | 0 | 4.440143  | 0.013311  | 1.330913  |
| 19 | 8 | 0 | -4.126129 | 2.638308  | 0.079553  |
| 20 | 8 | 0 | -1.706639 | -1.415957 | -0.557316 |
| 21 | 7 | 0 | 6.394566  | -0.620274 | 0.008803  |
| 22 | 6 | 0 | 7.062479  | -0.674911 | -1.283774 |
| 23 | 6 | 0 | 7.211137  | -0.646543 | 1.213594  |
| 24 | 1 | 0 | -6.680975 | 1.202185  | 0.462623  |
| 25 | 1 | 0 | -4.101461 | -3.064557 | -0.181131 |
| 26 | 1 | 0 | -7.837716 | -1.016658 | 0.561303  |
| 27 | 1 | 0 | -6.568216 | -3.115449 | 0.245991  |
| 28 | 1 | 0 | -1.534573 | 2.747691  | -0.343437 |
| 29 | 1 | 0 | 0.328980  | 1.134223  | -1.668203 |
| 30 | 1 | 0 | 0.568066  | 1.095085  | 1.401367  |
| 31 | 1 | 0 | 2.647564  | 0.554107  | 2.369290  |
| 32 | 1 | 0 | 2.408735  | 0.498423  | -1.933965 |
| 33 | 1 | 0 | 4.731020  | -0.159614 | -2.069250 |
| 34 | 1 | 0 | 4.987228  | -0.105663 | 2.262227  |
| 35 | 1 | 0 | 7.117627  | 0.314174  | -1.771447 |
| 36 | 1 | 0 | 6.547492  | -1.365964 | -1.965849 |
| 37 | 1 | 0 | 8.081308  | -1.045530 | -1.141302 |
| 38 | 1 | 0 | 7.317807  | 0.352834  | 1.670950  |
| 39 | 1 | 0 | 8.208064  | -1.017251 | 0.959718  |
| 40 | 1 | 0 | 6.782987  | -1.323914 | 1.966070  |

### TS C-C3

Standard orientation:

| Center<br>Number | Atomic<br>Number | Atomic<br>Type | Coordinates (Angstroms) |           |           |
|------------------|------------------|----------------|-------------------------|-----------|-----------|
|                  |                  |                | X                       | Y         | Z         |
| 1                | 6                | 0              | -6.119758               | 0.248577  | 0.330276  |
| 2                | 6                | 0              | -4.637578               | -2.158734 | -0.022676 |
| 3                | 6                | 0              | -6.746807               | -0.999269 | 0.395400  |
| 4                | 6                | 0              | -4.744453               | 0.275953  | 0.088702  |
| 5                | 6                | 0              | -4.012602               | -0.911695 | -0.085572 |
| 6                | 6                | 0              | -6.013981               | -2.189028 | 0.221605  |
| 7                | 6                | 0              | -2.572835               | -0.595987 | -0.331693 |
| 8                | 6                | 0              | -2.457768               | 0.896006  | -0.271799 |
| 9                | 6                | 0              | -3.831198               | 1.447892  | -0.028554 |
| 10               | 6                | 0              | -1.365244               | 1.675179  | -0.408672 |
| 11               | 6                | 0              | 0.027361                | 1.238993  | -0.631785 |
| 12               | 6                | 0              | 0.912083                | 1.016477  | 0.358709  |
| 13               | 6                | 0              | 2.320467                | 0.626524  | 0.226523  |
| 14               | 6                | 0              | 5.091755                | -0.121990 | 0.083375  |
| 15               | 6                | 0              | 2.958447                | 0.388821  | -1.008122 |
| 16               | 6                | 0              | 3.106368                | 0.465538  | 1.383151  |
| 17               | 6                | 0              | 4.449271                | 0.100380  | 1.327560  |
| 18               | 6                | 0              | 4.296714                | 0.023484  | -1.086603 |

|    |   |   |           |           |           |
|----|---|---|-----------|-----------|-----------|
| 19 | 8 | 0 | -4.141900 | 2.627458  | 0.060068  |
| 20 | 8 | 0 | -1.689391 | -1.409518 | -0.558586 |
| 21 | 7 | 0 | 6.429649  | -0.453055 | 0.007813  |
| 22 | 6 | 0 | 7.166059  | -0.756790 | 1.226177  |
| 23 | 6 | 0 | 7.006285  | -0.852164 | -1.268280 |
| 24 | 1 | 0 | -6.682654 | 1.171489  | 0.463277  |
| 25 | 1 | 0 | -4.067378 | -3.076746 | -0.158221 |
| 26 | 1 | 0 | -7.819005 | -1.056744 | 0.583222  |
| 27 | 1 | 0 | -6.531948 | -3.146466 | 0.279049  |
| 28 | 1 | 0 | -1.551924 | 2.756364  | -0.366240 |
| 29 | 1 | 0 | 0.326944  | 1.153874  | -1.680694 |
| 30 | 1 | 0 | 0.563523  | 1.132240  | 1.389235  |
| 31 | 1 | 0 | 2.399386  | 0.485418  | -1.939099 |
| 32 | 1 | 0 | 2.650393  | 0.628894  | 2.361375  |
| 33 | 1 | 0 | 4.995427  | -0.012244 | 2.260207  |
| 34 | 1 | 0 | 4.727431  | -0.153366 | -2.068529 |
| 35 | 1 | 0 | 6.758158  | -1.635145 | 1.756723  |
| 36 | 1 | 0 | 7.153662  | 0.097521  | 1.917720  |
| 37 | 1 | 0 | 8.208823  | -0.962900 | 0.969404  |
| 38 | 1 | 0 | 6.536050  | -1.764183 | -1.675906 |
| 39 | 1 | 0 | 8.073194  | -1.047655 | -1.129707 |
| 40 | 1 | 0 | 6.907180  | -0.051498 | -2.014677 |

## TS C-CAr, C-N

Standard orientation:

| Center Number | Atomic Number | Atomic Type | Coordinates (Angstroms) |           |           |
|---------------|---------------|-------------|-------------------------|-----------|-----------|
|               |               |             | X                       | Y         | Z         |
| 1             | 6             | 0           | 6.209369                | -0.507965 | -0.083715 |
| 2             | 6             | 0           | 5.007895                | 2.071557  | 0.051443  |
| 3             | 6             | 0           | 6.992733                | 0.650853  | -0.048370 |
| 4             | 6             | 0           | 4.822327                | -0.358312 | -0.050617 |
| 5             | 6             | 0           | 4.229151                | 0.914134  | 0.016141  |
| 6             | 6             | 0           | 6.399039                | 1.925064  | 0.018354  |
| 7             | 6             | 0           | 2.740163                | 0.779638  | 0.038714  |
| 8             | 6             | 0           | 2.452257                | -0.680903 | -0.019199 |
| 9             | 6             | 0           | 3.756024                | -1.402619 | -0.075817 |
| 10            | 6             | 0           | 1.248935                | -1.317073 | -0.022578 |
| 11            | 6             | 0           | -0.054336               | -0.700715 | 0.030549  |
| 12            | 6             | 0           | -1.182228               | -1.447865 | 0.022778  |
| 13            | 6             | 0           | -2.558306               | -0.888496 | 0.075759  |
| 14            | 6             | 0           | -5.185280               | 0.155705  | 0.174961  |
| 15            | 6             | 0           | -3.249607               | -0.575217 | -1.106632 |
| 16            | 6             | 0           | -3.199782               | -0.679552 | 1.306519  |
| 17            | 6             | 0           | -4.498001               | -0.161191 | 1.352160  |
| 18            | 6             | 0           | -4.546260               | -0.057304 | -1.056531 |
| 19            | 8             | 0           | 3.925455                | -2.614740 | -0.132022 |
| 20            | 8             | 0           | 1.937884                | 1.705006  | 0.094169  |
| 21            | 7             | 0           | -6.523010               | 0.690053  | 0.271870  |
| 22            | 6             | 0           | -6.631778               | 2.059620  | -0.237860 |
| 23            | 6             | 0           | -7.536850               | -0.191735 | -0.312666 |
| 24            | 1             | 0           | 6.664214                | -1.496300 | -0.135503 |
| 25            | 1             | 0           | 4.544747                | 3.056042  | 0.103062  |
| 26            | 1             | 0           | 8.079533                | 0.570029  | -0.072774 |
| 27            | 1             | 0           | 7.036439                | 2.808998  | 0.044414  |
| 28            | 1             | 0           | 1.277673                | -2.410230 | -0.070191 |
| 29            | 1             | 0           | -0.110292               | 0.386318  | 0.077970  |
| 30            | 1             | 0           | -1.087860               | -2.538108 | -0.025183 |
| 31            | 1             | 0           | -2.767650               | -0.733079 | -2.071821 |
| 32            | 1             | 0           | -2.680782               | -0.918430 | 2.234972  |

|    |   |   |           |           |           |
|----|---|---|-----------|-----------|-----------|
| 33 | 1 | 0 | -4.990979 | 0.005649  | 2.309562  |
| 34 | 1 | 0 | -5.058789 | 0.183590  | -1.987864 |
| 35 | 1 | 0 | -6.498748 | 2.131523  | -1.335818 |
| 36 | 1 | 0 | -5.878131 | 2.693243  | 0.245055  |
| 37 | 1 | 0 | -7.626484 | 2.454506  | 0.009237  |
| 38 | 1 | 0 | -7.465315 | -0.272837 | -1.415782 |
| 39 | 1 | 0 | -8.533808 | 0.197627  | -0.065856 |
| 40 | 1 | 0 | -7.442203 | -1.196777 | 0.115887  |

## 8, 225 K, dichloromethane, B3LYP/aug-cc-pVDZ

### GS

Standard orientation:

| Center<br>Number | Atomic<br>Number | Atomic<br>Type | Coordinates (Angstroms) |           |           |
|------------------|------------------|----------------|-------------------------|-----------|-----------|
|                  |                  |                | X                       | Y         | Z         |
| 1                | 6                | 0              | -5.666668               | -0.605782 | 0.000000  |
| 2                | 6                | 0              | -4.162639               | -3.011385 | 0.000009  |
| 3                | 6                | 0              | -6.299001               | -1.857375 | 0.000003  |
| 4                | 6                | 0              | -4.266825               | -0.560570 | 0.000001  |
| 5                | 6                | 0              | -3.540503               | -1.767881 | 0.000006  |
| 6                | 6                | 0              | -5.562623               | -3.049754 | 0.000008  |
| 7                | 6                | 0              | -3.302027               | 0.576346  | -0.000002 |
| 8                | 6                | 0              | -1.960602               | 0.014573  | 0.000001  |
| 9                | 6                | 0              | -2.085512               | -1.465414 | 0.000006  |
| 10               | 8                | 0              | -1.184300               | -2.301929 | 0.000010  |
| 11               | 6                | 0              | -3.674312               | 1.918571  | -0.000006 |
| 12               | 6                | 0              | -2.753991               | 3.010828  | -0.000008 |
| 13               | 6                | 0              | -5.029892               | 2.368021  | -0.000008 |
| 14               | 7                | 0              | -6.112589               | 2.800668  | -0.000010 |
| 15               | 7                | 0              | -2.053056               | 3.942612  | -0.000010 |
| 16               | 6                | 0              | -0.747826               | 0.700605  | -0.000001 |
| 17               | 6                | 0              | 0.544251                | 0.134323  | 0.000001  |
| 18               | 6                | 0              | 1.660888                | 0.951820  | -0.000002 |
| 19               | 6                | 0              | 3.034706                | 0.556821  | -0.000001 |
| 20               | 6                | 0              | 5.819072                | -0.125693 | 0.000000  |
| 21               | 6                | 0              | 3.466936                | -0.798021 | 0.000003  |
| 22               | 6                | 0              | 4.047649                | 1.552352  | -0.000005 |
| 23               | 6                | 0              | 5.391911                | 1.235973  | -0.000004 |
| 24               | 6                | 0              | 4.804146                | -1.134075 | 0.000004  |
| 25               | 7                | 0              | 7.138925                | -0.454001 | 0.000000  |
| 26               | 6                | 0              | 8.160516                | 0.589956  | -0.000004 |
| 27               | 6                | 0              | 7.557338                | -1.853791 | 0.000005  |
| 28               | 1                | 0              | -6.276189               | 0.291820  | -0.000004 |
| 29               | 1                | 0              | -3.569028               | -3.924948 | 0.000013  |
| 30               | 1                | 0              | -7.387972               | -1.899353 | 0.000003  |
| 31               | 1                | 0              | -6.083555               | -4.007123 | 0.000011  |
| 32               | 1                | 0              | -0.777861               | 1.789529  | -0.000005 |
| 33               | 1                | 0              | 0.639152                | -0.948262 | 0.000004  |
| 34               | 1                | 0              | 1.484130                | 2.031856  | -0.000006 |
| 35               | 1                | 0              | 2.731548                | -1.601266 | 0.000006  |
| 36               | 1                | 0              | 3.752920                | 2.602518  | -0.000008 |
| 37               | 1                | 0              | 6.120752                | 2.040976  | -0.000007 |
| 38               | 1                | 0              | 5.078384                | -2.184933 | 0.000007  |
| 39               | 1                | 0              | 9.146458                | 0.120514  | -0.000004 |
| 40               | 1                | 0              | 8.080792                | 1.226813  | -0.893251 |
| 41               | 1                | 0              | 8.080795                | 1.226818  | 0.893240  |
| 42               | 1                | 0              | 7.191284                | -2.380378 | 0.893464  |
| 43               | 1                | 0              | 7.191284                | -2.380384 | -0.893450 |

44 1 0 8.648594 -1.896414 0.000006

### TS C-CAr1

Standard orientation:

| Center<br>Number | Atomic<br>Number | Atomic<br>Type | Coordinates (Angstroms) |           |           |
|------------------|------------------|----------------|-------------------------|-----------|-----------|
|                  |                  |                | X                       | Y         | Z         |
| 1                | 6                | 0              | -5.608166               | -0.775130 | 0.000007  |
| 2                | 6                | 0              | -3.966223               | -3.091936 | -0.000008 |
| 3                | 6                | 0              | -6.164503               | -2.058864 | 0.000005  |
| 4                | 6                | 0              | -4.210714               | -0.648441 | 0.000001  |
| 5                | 6                | 0              | -3.415431               | -1.813130 | -0.000006 |
| 6                | 6                | 0              | -5.359027               | -3.208912 | -0.000002 |
| 7                | 6                | 0              | -3.326015               | 0.542582  | 0.000001  |
| 8                | 6                | 0              | -1.935564               | 0.058394  | -0.000002 |
| 9                | 6                | 0              | -1.982155               | -1.439845 | -0.000010 |
| 10               | 8                | 0              | -1.037593               | -2.219148 | -0.000017 |
| 11               | 6                | 0              | -3.764269               | 1.855301  | 0.000001  |
| 12               | 6                | 0              | -2.901435               | 2.996411  | -0.000005 |
| 13               | 6                | 0              | -5.144842               | 2.231502  | 0.000004  |
| 14               | 7                | 0              | -6.248784               | 2.602360  | 0.000007  |
| 15               | 7                | 0              | -2.252172               | 3.963428  | -0.000010 |
| 16               | 6                | 0              | -0.784665               | 0.803992  | 0.000004  |
| 17               | 6                | 0              | 0.565237                | 0.301293  | 0.000002  |
| 18               | 6                | 0              | 1.615236                | 1.159954  | 0.000011  |
| 19               | 6                | 0              | 3.039416                | 0.743218  | 0.000008  |
| 20               | 6                | 0              | 5.798430                | -0.024535 | 0.000002  |
| 21               | 6                | 0              | 3.740190                | 0.545556  | -1.200478 |
| 22               | 6                | 0              | 3.740190                | 0.545537  | 1.200491  |
| 23               | 6                | 0              | 5.081776                | 0.164929  | 1.208430  |
| 24               | 6                | 0              | 5.081776                | 0.164949  | -1.208423 |
| 25               | 7                | 0              | 7.141573                | -0.362754 | -0.000001 |
| 26               | 6                | 0              | 7.774334                | -0.770434 | 1.246577  |
| 27               | 6                | 0              | 7.774336                | -0.770408 | -1.246587 |
| 28               | 1                | 0              | -6.268434               | 0.085717  | 0.000013  |
| 29               | 1                | 0              | -3.320632               | -3.969251 | -0.000013 |
| 30               | 1                | 0              | -7.248916               | -2.165146 | 0.000010  |
| 31               | 1                | 0              | -5.825199               | -4.193917 | -0.000003 |
| 32               | 1                | 0              | -0.865950               | 1.890008  | 0.000013  |
| 33               | 1                | 0              | 0.730027                | -0.773593 | -0.000008 |
| 34               | 1                | 0              | 1.403806                | 2.235724  | 0.000021  |
| 35               | 1                | 0              | 3.227630                | 0.682615  | -2.153301 |
| 36               | 1                | 0              | 3.227630                | 0.682581  | 2.153316  |
| 37               | 1                | 0              | 5.567016                | 0.013931  | 2.168828  |
| 38               | 1                | 0              | 5.567015                | 0.013966  | -2.168824 |
| 39               | 1                | 0              | 8.833508                | -0.968378 | 1.058451  |
| 40               | 1                | 0              | 7.713909                | 0.028922  | 1.997610  |
| 41               | 1                | 0              | 7.320062                | -1.681890 | 1.675215  |
| 42               | 1                | 0              | 7.320066                | -1.681856 | -1.675244 |
| 43               | 1                | 0              | 7.713909                | 0.028964  | -1.997603 |
| 44               | 1                | 0              | 8.833510                | -0.968353 | -1.058464 |

### TS C-C

Standard orientation:

| Center<br>Number | Atomic<br>Number | Atomic<br>Type | Coordinates (Angstroms) |   |   |
|------------------|------------------|----------------|-------------------------|---|---|
|                  |                  |                | X                       | Y | Z |

|    |   |   |           |           |           |
|----|---|---|-----------|-----------|-----------|
| 1  | 6 | 0 | -5.408158 | -1.017651 | 0.268776  |
| 2  | 6 | 0 | -3.512311 | -3.113024 | -0.020235 |
| 3  | 6 | 0 | -5.792331 | -2.359014 | 0.347858  |
| 4  | 6 | 0 | -4.054439 | -0.717570 | 0.043564  |
| 5  | 6 | 0 | -3.130245 | -1.775314 | -0.096530 |
| 6  | 6 | 0 | -4.860042 | -3.400847 | 0.206549  |
| 7  | 6 | 0 | -3.345322 | 0.574346  | -0.087877 |
| 8  | 6 | 0 | -1.912782 | 0.268334  | -0.316696 |
| 9  | 6 | 0 | -1.773657 | -1.231892 | -0.333586 |
| 10 | 8 | 0 | -0.759482 | -1.879417 | -0.536125 |
| 11 | 6 | 0 | -3.928309 | 1.821263  | 0.005384  |
| 12 | 6 | 0 | -3.215890 | 3.057490  | -0.112509 |
| 13 | 6 | 0 | -5.326209 | 2.028604  | 0.236376  |
| 14 | 7 | 0 | -6.451796 | 2.260652  | 0.421584  |
| 15 | 7 | 0 | -2.697986 | 4.096963  | -0.196694 |
| 16 | 6 | 0 | -0.887946 | 1.132610  | -0.515590 |
| 17 | 6 | 0 | 0.534174  | 0.780992  | -0.706754 |
| 18 | 6 | 0 | 1.424841  | 0.702697  | 0.299730  |
| 19 | 6 | 0 | 2.862486  | 0.429354  | 0.198082  |
| 20 | 6 | 0 | 5.685572  | -0.102745 | 0.115485  |
| 21 | 6 | 0 | 3.643511  | 0.383692  | 1.368389  |
| 22 | 6 | 0 | 3.537268  | 0.209866  | -1.020244 |
| 23 | 6 | 0 | 4.902286  | -0.044393 | -1.070033 |
| 24 | 6 | 0 | 5.012679  | 0.130504  | 1.341649  |
| 25 | 7 | 0 | 7.035483  | -0.384923 | 0.072703  |
| 26 | 6 | 0 | 7.722630  | -0.451057 | -1.209218 |
| 27 | 6 | 0 | 7.833676  | -0.275684 | 1.285069  |
| 28 | 1 | 0 | -6.161620 | -0.245192 | 0.381467  |
| 29 | 1 | 0 | -2.771816 | -3.903558 | -0.134596 |
| 30 | 1 | 0 | -6.840535 | -2.599810 | 0.522522  |
| 31 | 1 | 0 | -5.194438 | -4.435777 | 0.274363  |
| 32 | 1 | 0 | -1.112560 | 2.199473  | -0.562999 |
| 33 | 1 | 0 | 0.849026  | 0.661128  | -1.747506 |
| 34 | 1 | 0 | 1.057183  | 0.849704  | 1.319366  |
| 35 | 1 | 0 | 3.163678  | 0.555900  | 2.333581  |
| 36 | 1 | 0 | 2.988393  | 0.240648  | -1.961699 |
| 37 | 1 | 0 | 5.364287  | -0.198782 | -2.041449 |
| 38 | 1 | 0 | 5.556219  | 0.115752  | 2.282466  |
| 39 | 1 | 0 | 8.771043  | -0.709434 | -1.036956 |
| 40 | 1 | 0 | 7.287279  | -1.229369 | -1.851851 |
| 41 | 1 | 0 | 7.686632  | 0.507622  | -1.755584 |
| 42 | 1 | 0 | 7.839891  | 0.750358  | 1.692903  |
| 43 | 1 | 0 | 7.460025  | -0.952759 | 2.066414  |
| 44 | 1 | 0 | 8.864381  | -0.562778 | 1.059561  |

## TS C-N

Standard orientation:

| Center Number | Atomic Number | Atomic Type | Coordinates (Angstroms) |           |           |
|---------------|---------------|-------------|-------------------------|-----------|-----------|
|               |               |             | X                       | Y         | Z         |
| 1             | 6             | 0           | -5.626600               | -0.695179 | -0.000022 |
| 2             | 6             | 0           | -4.051785               | -3.057292 | 0.000094  |
| 3             | 6             | 0           | -6.220137               | -1.963316 | 0.000016  |
| 4             | 6             | 0           | -4.227076               | -0.608677 | -0.000002 |
| 5             | 6             | 0           | -3.465406               | -1.795114 | 0.000055  |
| 6             | 6             | 0           | -5.448253               | -3.135137 | 0.000074  |
| 7             | 6             | 0           | -3.304389               | 0.556583  | -0.000033 |
| 8             | 6             | 0           | -1.935437               | 0.033027  | 0.000005  |
| 9             | 6             | 0           | -2.021694               | -1.458313 | 0.000064  |
| 10            | 8             | 0           | -1.097661               | -2.264888 | 0.000112  |



|    |   |   |           |           |           |
|----|---|---|-----------|-----------|-----------|
| 11 | 6 | 0 | -3.708135 | 1.883335  | -0.000088 |
| 12 | 6 | 0 | -2.814710 | 2.999669  | -0.000120 |
| 13 | 6 | 0 | -5.076977 | 2.296970  | -0.000121 |
| 14 | 7 | 0 | -6.170511 | 2.698650  | -0.000150 |
| 15 | 7 | 0 | -2.137477 | 3.947748  | -0.000148 |
| 16 | 6 | 0 | -0.755653 | 0.748320  | -0.000015 |
| 17 | 6 | 0 | 0.564704  | 0.208424  | 0.000013  |
| 18 | 6 | 0 | 1.646775  | 1.046847  | -0.000017 |
| 19 | 6 | 0 | 3.050401  | 0.674006  | -0.000002 |
| 20 | 6 | 0 | 5.816788  | 0.062508  | 0.000019  |
| 21 | 6 | 0 | 4.023458  | 1.696842  | -0.000042 |
| 22 | 6 | 0 | 3.495886  | -0.668957 | 0.000049  |
| 23 | 6 | 0 | 4.853267  | -0.966235 | 0.000060  |
| 24 | 6 | 0 | 5.384309  | 1.394836  | -0.000032 |
| 25 | 7 | 0 | 7.231518  | -0.206681 | 0.000030  |
| 26 | 6 | 0 | 7.682983  | -0.892420 | -1.215605 |
| 27 | 6 | 0 | 7.682984  | -0.892315 | 1.215723  |
| 28 | 1 | 0 | -6.262107 | 0.184077  | -0.000066 |
| 29 | 1 | 0 | -3.431571 | -3.952792 | 0.000138  |
| 30 | 1 | 0 | -7.307222 | -2.038169 | 0.000001  |
| 31 | 1 | 0 | -5.941907 | -4.106705 | 0.000103  |
| 32 | 1 | 0 | -0.809721 | 1.836094  | -0.000059 |
| 33 | 1 | 0 | 0.681678  | -0.871825 | 0.000056  |
| 34 | 1 | 0 | 1.451866  | 2.123125  | -0.000059 |
| 35 | 1 | 0 | 3.701605  | 2.738739  | -0.000082 |
| 36 | 1 | 0 | 2.774924  | -1.485009 | 0.000081  |
| 37 | 1 | 0 | 5.171631  | -2.008105 | 0.000100  |
| 38 | 1 | 0 | 6.130220  | 2.188430  | -0.000064 |
| 39 | 1 | 0 | 8.780632  | -0.921558 | -1.218052 |
| 40 | 1 | 0 | 7.312136  | -1.933185 | -1.296452 |
| 41 | 1 | 0 | 7.349915  | -0.334080 | -2.098641 |
| 42 | 1 | 0 | 8.780633  | -0.921452 | 1.218172  |
| 43 | 1 | 0 | 7.349916  | -0.333898 | 2.098711  |
| 44 | 1 | 0 | 7.312137  | -1.933072 | 1.296661  |

## TS C-CAr, C-N

Standard orientation:

| Center<br>Number | Atomic<br>Number | Atomic<br>Type | Coordinates (Angstroms) |           |           |
|------------------|------------------|----------------|-------------------------|-----------|-----------|
|                  |                  |                | X                       | Y         | Z         |
| 1                | 6                | 0              | 5.603904                | -0.744017 | -0.044781 |
| 2                | 6                | 0              | 3.979108                | -3.072467 | 0.012563  |
| 3                | 6                | 0              | 6.169333                | -2.023624 | -0.041555 |
| 4                | 6                | 0              | 4.205756                | -0.627224 | -0.018826 |
| 5                | 6                | 0              | 3.419067                | -1.797582 | 0.009562  |
| 6                | 6                | 0              | 5.372363                | -3.179396 | -0.013401 |
| 7                | 6                | 0              | 3.313406                | 0.557505  | -0.015688 |
| 8                | 6                | 0              | 1.925967                | 0.063588  | 0.020231  |
| 9                | 6                | 0              | 1.983706                | -1.435058 | 0.033763  |
| 10               | 8                | 0              | 1.044602                | -2.220184 | 0.059771  |
| 11               | 6                | 0              | 3.740885                | 1.872991  | -0.045042 |
| 12               | 6                | 0              | 2.868730                | 3.007073  | -0.046975 |
| 13               | 6                | 0              | 5.118298                | 2.259463  | -0.079137 |
| 14               | 7                | 0              | 6.219144                | 2.638142  | -0.107173 |
| 15               | 7                | 0              | 2.210928                | 3.968222  | -0.050661 |
| 16               | 6                | 0              | 0.770973                | 0.800592  | 0.041014  |
| 17               | 6                | 0              | -0.574961               | 0.285116  | 0.073239  |
| 18               | 6                | 0              | -1.631703               | 1.132949  | 0.087243  |
| 19               | 6                | 0              | -3.051892               | 0.697900  | 0.115748  |
| 20               | 6                | 0              | -5.763460               | -0.102290 | 0.166593  |

|    |   |   |           |           |           |
|----|---|---|-----------|-----------|-----------|
| 21 | 6 | 0 | -3.718891 | 0.508460  | 1.335986  |
| 22 | 6 | 0 | -3.758572 | 0.488304  | -1.080323 |
| 23 | 6 | 0 | -5.097548 | 0.090640  | -1.053834 |
| 24 | 6 | 0 | -5.059488 | 0.110354  | 1.357294  |
| 25 | 7 | 0 | -7.145723 | -0.512038 | 0.238621  |
| 26 | 6 | 0 | -7.376980 | -1.849676 | -0.313433 |
| 27 | 6 | 0 | -8.067753 | 0.477664  | -0.325069 |
| 28 | 1 | 0 | 6.257723  | 0.121439  | -0.066910 |
| 29 | 1 | 0 | 3.340136  | -3.954318 | 0.034656  |
| 30 | 1 | 0 | 7.254274  | -2.122302 | -0.061423 |
| 31 | 1 | 0 | 5.845717  | -4.160951 | -0.011877 |
| 32 | 1 | 0 | 0.843170  | 1.887123  | 0.031812  |
| 33 | 1 | 0 | -0.728310 | -0.791446 | 0.084294  |
| 34 | 1 | 0 | -1.440923 | 2.211504  | 0.075506  |
| 35 | 1 | 0 | -3.187863 | 0.668454  | 2.274455  |
| 36 | 1 | 0 | -3.256528 | 0.633176  | -2.037198 |
| 37 | 1 | 0 | -5.622567 | -0.071124 | -1.995151 |
| 38 | 1 | 0 | -5.573912 | -0.041490 | 2.305846  |
| 39 | 1 | 0 | -8.406113 | -2.157250 | -0.084012 |
| 40 | 1 | 0 | -7.242135 | -1.900702 | -1.412381 |
| 41 | 1 | 0 | -6.689664 | -2.564982 | 0.154098  |
| 42 | 1 | 0 | -9.098749 | 0.175328  | -0.096892 |
| 43 | 1 | 0 | -7.884287 | 1.456080  | 0.135086  |
| 44 | 1 | 0 | -7.978730 | 0.585084  | -1.424629 |

9, 242 K, dichloromethane, B3LYP/aug-cc-pVDZ

GS

Standard orientation:

| Center<br>Number | Atomic<br>Number | Atomic<br>Type | Coordinates (Angstroms) |           |           |
|------------------|------------------|----------------|-------------------------|-----------|-----------|
|                  |                  |                | X                       | Y         | Z         |
| 1                | 6                | 0              | -5.332136               | -0.161850 | -1.118799 |
| 2                | 6                | 0              | -4.161762               | 2.401097  | -0.824786 |
| 3                | 6                | 0              | -5.993527               | 0.985446  | -1.575246 |
| 4                | 6                | 0              | -4.070950               | -0.025375 | -0.531941 |
| 5                | 6                | 0              | -3.487281               | 1.260453  | -0.382422 |
| 6                | 6                | 0              | -5.414621               | 2.250684  | -1.432835 |
| 7                | 6                | 0              | -3.132583               | -1.032057 | 0.005447  |
| 8                | 6                | 0              | -1.887524               | -0.327351 | 0.312102  |
| 9                | 6                | 0              | -2.184567               | 1.099804  | 0.290773  |
| 10               | 6                | 0              | -1.476048               | 2.107207  | 0.932887  |
| 11               | 6                | 0              | -3.416702               | -2.376112 | 0.208044  |
| 12               | 6                | 0              | -2.533526               | -3.281730 | 0.872870  |
| 13               | 6                | 0              | -4.650434               | -2.989762 | -0.168022 |
| 14               | 7                | 0              | -5.634391               | -3.543353 | -0.457300 |
| 15               | 7                | 0              | -1.855795               | -4.053972 | 1.422917  |
| 16               | 6                | 0              | -0.635380               | -0.950418 | 0.318500  |
| 17               | 6                | 0              | 0.642008                | -0.381847 | 0.177295  |
| 18               | 6                | 0              | 1.763914                | -1.195214 | 0.120535  |
| 19               | 6                | 0              | 3.122514                | -0.802460 | -0.057138 |
| 20               | 6                | 0              | 5.885957                | -0.127677 | -0.407686 |
| 21               | 6                | 0              | 3.545290                | 0.549535  | -0.196792 |
| 22               | 6                | 0              | 4.135880                | -1.799060 | -0.099339 |
| 23               | 6                | 0              | 5.468862                | -1.486499 | -0.267999 |
| 24               | 6                | 0              | 4.871075                | 0.881496  | -0.366631 |
| 25               | 7                | 0              | 7.194057                | 0.197494  | -0.571450 |
| 26               | 6                | 0              | 8.218744                | -0.844285 | -0.599910 |

|    |   |   |           |           |           |
|----|---|---|-----------|-----------|-----------|
| 27 | 6 | 0 | 7.602717  | 1.594105  | -0.711850 |
| 28 | 6 | 0 | -0.456452 | 1.850640  | 1.899572  |
| 29 | 6 | 0 | -1.794722 | 3.494459  | 0.809464  |
| 30 | 7 | 0 | -2.003359 | 4.638005  | 0.727060  |
| 31 | 7 | 0 | 0.346737  | 1.689163  | 2.727854  |
| 32 | 1 | 0 | -5.804944 | -1.131132 | -1.239807 |
| 33 | 1 | 0 | -3.732718 | 3.393263  | -0.724140 |
| 34 | 1 | 0 | -6.969629 | 0.886655  | -2.048932 |
| 35 | 1 | 0 | -5.940932 | 3.131513  | -1.799265 |
| 36 | 1 | 0 | -0.643306 | -2.039428 | 0.329498  |
| 37 | 1 | 0 | 0.754211  | 0.693660  | 0.071087  |
| 38 | 1 | 0 | 1.595597  | -2.270848 | 0.223899  |
| 39 | 1 | 0 | 2.811755  | 1.353599  | -0.166965 |
| 40 | 1 | 0 | 3.848636  | -2.845843 | 0.006218  |
| 41 | 1 | 0 | 6.198005  | -2.290782 | -0.291429 |
| 42 | 1 | 0 | 5.138882  | 1.929230  | -0.465254 |
| 43 | 1 | 0 | 9.196162  | -0.375538 | -0.730840 |
| 44 | 1 | 0 | 8.054606  | -1.541892 | -1.433970 |
| 45 | 1 | 0 | 8.686066  | 1.633397  | -0.842420 |
| 46 | 1 | 0 | 7.132090  | 2.060152  | -1.589360 |
| 47 | 1 | 0 | 7.340338  | 2.178638  | 0.181869  |
| 48 | 1 | 0 | 8.231976  | -1.415384 | 0.339689  |

## TS C-C1

Standard orientation:

| Center<br>Number | Atomic<br>Number | Atomic<br>Type | Coordinates (Angstroms) |           |           |
|------------------|------------------|----------------|-------------------------|-----------|-----------|
|                  |                  |                | X                       | Y         | Z         |
| 1                | 6                | 0              | -4.918722               | 1.414483  | 1.048620  |
| 2                | 6                | 0              | -4.918705               | -1.414585 | 1.048526  |
| 3                | 6                | 0              | -5.968199               | 0.696496  | 1.652356  |
| 4                | 6                | 0              | -3.874012               | 0.708249  | 0.459129  |
| 5                | 6                | 0              | -3.874004               | -0.708300 | 0.459082  |
| 6                | 6                | 0              | -5.968191               | -0.696651 | 1.652310  |
| 7                | 6                | 0              | -2.647577               | 1.162687  | -0.252750 |
| 8                | 6                | 0              | -1.926095               | 0.000023  | -0.635114 |
| 9                | 6                | 0              | -2.647564               | -1.162676 | -0.252828 |
| 10               | 6                | 0              | -2.299317               | -2.501594 | -0.509105 |
| 11               | 6                | 0              | -2.299346               | 2.501626  | -0.508939 |
| 12               | 6                | 0              | -1.193060               | 2.868505  | -1.327877 |
| 13               | 6                | 0              | -3.029970               | 3.618005  | -0.017157 |
| 14               | 7                | 0              | -3.589515               | 4.568618  | 0.367394  |
| 15               | 7                | 0              | -0.315678               | 3.224183  | -2.011884 |
| 16               | 6                | 0              | -0.586846               | 0.000051  | -1.258926 |
| 17               | 6                | 0              | 0.567064                | 0.000035  | -0.538982 |
| 18               | 6                | 0              | 1.834778                | 0.000062  | -1.193819 |
| 19               | 6                | 0              | 3.092579                | 0.000042  | -0.601542 |
| 20               | 6                | 0              | 5.728326                | -0.000009 | 0.509996  |
| 21               | 6                | 0              | 3.305384                | -0.000009 | 0.821860  |
| 22               | 6                | 0              | 4.263685                | 0.000071  | -1.436516 |
| 23               | 6                | 0              | 5.526525                | 0.000047  | -0.915612 |
| 24               | 6                | 0              | 4.561126                | -0.000033 | 1.357719  |
| 25               | 7                | 0              | 6.960969                | -0.000040 | 1.034426  |
| 26               | 6                | 0              | 8.148507                | -0.000020 | 0.169599  |
| 27               | 6                | 0              | 7.164781                | -0.000099 | 2.489409  |
| 28               | 6                | 0              | -1.193023               | -2.868406 | -1.328063 |
| 29               | 6                | 0              | -3.029930               | -3.618014 | -0.017402 |
| 30               | 7                | 0              | -3.589467               | -4.568659 | 0.367082  |
| 31               | 7                | 0              | -0.315634               | -3.224030 | -2.012090 |

|    |   |   |           |           |           |
|----|---|---|-----------|-----------|-----------|
| 32 | 1 | 0 | -4.943818 | 2.500049  | 1.055380  |
| 33 | 1 | 0 | -4.943788 | -2.500152 | 1.055213  |
| 34 | 1 | 0 | -6.787242 | 1.241146  | 2.121659  |
| 35 | 1 | 0 | -6.787227 | -1.241342 | 2.121576  |
| 36 | 1 | 0 | -0.511826 | 0.000087  | -2.350254 |
| 37 | 1 | 0 | 0.513481  | -0.000002 | 0.549100  |
| 38 | 1 | 0 | 1.807966  | 0.000100  | -2.286024 |
| 39 | 1 | 0 | 2.450827  | -0.000030 | 1.495139  |
| 40 | 1 | 0 | 4.131352  | 0.000113  | -2.518249 |
| 41 | 1 | 0 | 6.378032  | 0.000070  | -1.588222 |
| 42 | 1 | 0 | 4.674007  | -0.000073 | 2.437104  |
| 43 | 1 | 0 | 9.039170  | -0.000064 | 0.799210  |
| 44 | 1 | 0 | 8.167236  | 0.895389  | -0.464931 |
| 45 | 1 | 0 | 8.236520  | -0.000111 | 2.691753  |
| 46 | 1 | 0 | 6.722118  | 0.895325  | 2.944147  |
| 47 | 1 | 0 | 6.722111  | -0.895557 | 2.944074  |
| 48 | 1 | 0 | 8.167206  | -0.895371 | -0.465013 |

## TS C-C2

Standard orientation:

| Center Number | Atomic Number | Atomic Type | Coordinates (Angstroms) |           |           |
|---------------|---------------|-------------|-------------------------|-----------|-----------|
|               |               |             | X                       | Y         | Z         |
| 1             | 6             | 0           | -5.382992               | 0.337181  | -0.959995 |
| 2             | 6             | 0           | -3.783273               | 2.650931  | -0.576135 |
| 3             | 6             | 0           | -5.875518               | 1.608191  | -1.265703 |
| 4             | 6             | 0           | -4.074413               | 0.221988  | -0.475600 |
| 5             | 6             | 0           | -3.274579               | 1.382602  | -0.274747 |
| 6             | 6             | 0           | -5.083306               | 2.750327  | -1.079801 |
| 7             | 6             | 0           | -3.288272               | -0.962013 | -0.116307 |
| 8             | 6             | 0           | -1.889632               | -0.490720 | 0.051905  |
| 9             | 6             | 0           | -1.978264               | 0.970620  | 0.286186  |
| 10            | 6             | 0           | -1.113754               | 1.754044  | 1.011474  |
| 11            | 6             | 0           | -3.732179               | -2.247617 | 0.082889  |
| 12            | 6             | 0           | -2.883368               | -3.298139 | 0.562425  |
| 13            | 6             | 0           | -5.092261               | -2.645952 | -0.118254 |
| 14            | 7             | 0           | -6.187842               | -3.006537 | -0.273130 |
| 15            | 7             | 0           | -2.240736               | -4.180551 | 0.966001  |
| 16            | 6             | 0           | -0.827004               | -1.214031 | -0.384570 |
| 17            | 6             | 0           | 0.566521                | -0.799333 | -0.629623 |
| 18            | 6             | 0           | 1.586660                | -0.933684 | 0.241153  |
| 19            | 6             | 0           | 3.003462                | -0.659969 | -0.000493 |
| 20            | 6             | 0           | 5.806031                | -0.144582 | -0.354117 |
| 21            | 6             | 0           | 3.929083                | -0.845671 | 1.045127  |
| 22            | 6             | 0           | 3.521775                | -0.215219 | -1.234973 |
| 23            | 6             | 0           | 4.875018                | 0.035321  | -1.416012 |
| 24            | 6             | 0           | 5.289359                | -0.601320 | 0.886374  |
| 25            | 7             | 0           | 7.145079                | 0.114634  | -0.524932 |
| 26            | 6             | 0           | 7.653994                | 0.522434  | -1.826450 |
| 27            | 6             | 0           | 8.082074                | -0.144358 | 0.558465  |
| 28            | 6             | 0           | -0.086653               | 1.240934  | 1.866751  |
| 29            | 6             | 0           | -1.269202               | 3.174999  | 1.122527  |
| 30            | 7             | 0           | -1.349272               | 4.331141  | 1.226535  |
| 31            | 7             | 0           | 0.695630                | 0.918290  | 2.665059  |
| 32            | 1             | 0           | -6.010079               | -0.535229 | -1.117877 |
| 33            | 1             | 0           | -3.188744               | 3.549866  | -0.445210 |
| 34            | 1             | 0           | -6.886253               | 1.710775  | -1.658746 |
| 35            | 1             | 0           | -5.484350               | 3.731126  | -1.332924 |
| 36            | 1             | 0           | -1.067825               | -2.216892 | -0.750491 |

|    |   |   |          |           |           |
|----|---|---|----------|-----------|-----------|
| 37 | 1 | 0 | 0.757799 | -0.502822 | -1.666056 |
| 38 | 1 | 0 | 1.355757 | -1.287423 | 1.247268  |
| 39 | 1 | 0 | 3.570023 | -1.192799 | 2.015175  |
| 40 | 1 | 0 | 2.855659 | -0.063048 | -2.084438 |
| 41 | 1 | 0 | 5.214552 | 0.372284  | -2.391763 |
| 42 | 1 | 0 | 5.950077 | -0.765915 | 1.733122  |
| 43 | 1 | 0 | 8.730477 | 0.695404  | -1.749131 |
| 44 | 1 | 0 | 7.183900 | 1.457750  | -2.166386 |
| 45 | 1 | 0 | 9.088137 | 0.132970  | 0.233547  |
| 46 | 1 | 0 | 7.837206 | 0.450363  | 1.451721  |
| 47 | 1 | 0 | 8.094011 | -1.208562 | 0.846661  |
| 48 | 1 | 0 | 7.483795 | -0.248466 | -2.596182 |

## TS C-CAr

Standard orientation:

| Center<br>Number | Atomic<br>Number | Atomic<br>Type | Coordinates (Angstroms) |           |           |
|------------------|------------------|----------------|-------------------------|-----------|-----------|
|                  |                  |                | X                       | Y         | Z         |
| 1                | 6                | 0              | -5.235971               | 0.141785  | -1.251269 |
| 2                | 6                | 0              | -3.840530               | 2.578749  | -0.841122 |
| 3                | 6                | 0              | -5.756249               | 1.354036  | -1.714165 |
| 4                | 6                | 0              | -4.000386               | 0.147062  | -0.594083 |
| 5                | 6                | 0              | -3.304074               | 1.370011  | -0.386216 |
| 6                | 6                | 0              | -5.065861               | 2.557333  | -1.514231 |
| 7                | 6                | 0              | -3.202546               | -0.953957 | -0.033466 |
| 8                | 6                | 0              | -1.880817               | -0.379859 | 0.295331  |
| 9                | 6                | 0              | -2.064714               | 1.081294  | 0.349508  |
| 10               | 6                | 0              | -1.326641               | 1.970296  | 1.102182  |
| 11               | 6                | 0              | -3.617829               | -2.249138 | 0.193377  |
| 12               | 6                | 0              | -2.817209               | -3.221437 | 0.873624  |
| 13               | 6                | 0              | -4.911627               | -2.735317 | -0.175357 |
| 14               | 7                | 0              | -5.951770               | -3.174139 | -0.459641 |
| 15               | 7                | 0              | -2.206175               | -4.039417 | 1.432975  |
| 16               | 6                | 0              | -0.709479               | -1.088435 | 0.218395  |
| 17               | 6                | 0              | 0.637015                | -0.590519 | 0.126650  |
| 18               | 6                | 0              | 1.683492                | -1.443256 | 0.002351  |
| 19               | 6                | 0              | 3.096906                | -1.018175 | -0.147719 |
| 20               | 6                | 0              | 5.834483                | -0.234314 | -0.442202 |
| 21               | 6                | 0              | 3.926277                | -0.838388 | 0.971001  |
| 22               | 6                | 0              | 3.657432                | -0.795083 | -1.415579 |
| 23               | 6                | 0              | 4.988202                | -0.406678 | -1.566744 |
| 24               | 6                | 0              | 5.258588                | -0.450900 | 0.835427  |
| 25               | 7                | 0              | 7.166108                | 0.113500  | -0.585373 |
| 26               | 6                | 0              | 7.660799                | 0.531286  | -1.889364 |
| 27               | 6                | 0              | 7.937955                | 0.489730  | 0.590678  |
| 28               | 6                | 0              | -0.350836               | 1.556363  | 2.063482  |
| 29               | 6                | 0              | -1.564245               | 3.381801  | 1.097053  |
| 30               | 7                | 0              | -1.717958               | 4.535433  | 1.112295  |
| 31               | 7                | 0              | 0.416425                | 1.262052  | 2.887595  |
| 32               | 1                | 0              | -5.788106               | -0.777327 | -1.421595 |
| 33               | 1                | 0              | -3.320774               | 3.521814  | -0.700691 |
| 34               | 1                | 0              | -6.709523               | 1.360298  | -2.241350 |
| 35               | 1                | 0              | -5.486475               | 3.489436  | -1.889973 |
| 36               | 1                | 0              | -0.795609               | -2.168568 | 0.104300  |
| 37               | 1                | 0              | 0.825246                | 0.481002  | 0.111240  |
| 38               | 1                | 0              | 1.475471                | -2.519030 | 0.015519  |
| 39               | 1                | 0              | 3.523367                | -0.994370 | 1.972021  |
| 40               | 1                | 0              | 3.042316                | -0.919829 | -2.307445 |
| 41               | 1                | 0              | 5.362633                | -0.235675 | -2.572325 |

|    |   |   |          |           |           |
|----|---|---|----------|-----------|-----------|
| 42 | 1 | 0 | 5.847814 | -0.314185 | 1.738021  |
| 43 | 1 | 0 | 8.732597 | 0.735408  | -1.813165 |
| 44 | 1 | 0 | 7.158332 | 1.442026  | -2.261647 |
| 45 | 1 | 0 | 8.965832 | 0.705606  | 0.285736  |
| 46 | 1 | 0 | 7.530054 | 1.382514  | 1.097444  |
| 47 | 1 | 0 | 7.972065 | -0.332510 | 1.318604  |
| 48 | 1 | 0 | 7.525549 | -0.264362 | -2.634910 |

## TS C-N

Standard orientation:

| Center<br>Number | Atomic<br>Number | Atomic<br>Type | Coordinates (Angstroms) |           |           |
|------------------|------------------|----------------|-------------------------|-----------|-----------|
|                  |                  |                | X                       | Y         | Z         |
| 1                | 6                | 0              | 5.277984                | 0.205123  | -1.219207 |
| 2                | 6                | 0              | 4.121290                | -2.368247 | -0.927397 |
| 3                | 6                | 0              | 5.918435                | -0.931452 | -1.723948 |
| 4                | 6                | 0              | 4.042300                | 0.054276  | -0.580964 |
| 5                | 6                | 0              | 3.466193                | -1.236798 | -0.432111 |
| 6                | 6                | 0              | 5.345929                | -2.201972 | -1.582817 |
| 7                | 6                | 0              | 3.131102                | 1.049905  | 0.009305  |
| 8                | 6                | 0              | 1.879159                | 0.337164  | 0.316538  |
| 9                | 6                | 0              | 2.194936                | -1.096648 | 0.295257  |
| 10               | 6                | 0              | 1.530702                | -2.094795 | 0.982974  |
| 11               | 6                | 0              | 3.417570                | 2.377712  | 0.264936  |
| 12               | 6                | 0              | 2.530845                | 3.253413  | 0.967442  |
| 13               | 6                | 0              | 4.654172                | 3.000043  | -0.092509 |
| 14               | 7                | 0              | 5.642428                | 3.552499  | -0.365200 |
| 15               | 7                | 0              | 1.846752                | 3.997804  | 1.545498  |
| 16               | 6                | 0              | 0.637620                | 0.941610  | 0.297329  |
| 17               | 6                | 0              | -0.647350               | 0.340839  | 0.174592  |
| 18               | 6                | 0              | -1.767908               | 1.124248  | 0.102225  |
| 19               | 6                | 0              | -3.141075               | 0.688777  | -0.071884 |
| 20               | 6                | 0              | -5.855519               | -0.041596 | -0.420672 |
| 21               | 6                | 0              | -3.517482               | -0.668986 | -0.186032 |
| 22               | 6                | 0              | -4.157674               | 1.668731  | -0.134619 |
| 23               | 6                | 0              | -5.492101               | 1.311060  | -0.306193 |
| 24               | 6                | 0              | -4.851298               | -1.022559 | -0.357977 |
| 25               | 7                | 0              | -7.220408               | -0.463687 | -0.599056 |
| 26               | 6                | 0              | -7.797767               | -0.008609 | -1.868486 |
| 27               | 6                | 0              | -8.076803               | -0.129024 | 0.544107  |
| 28               | 6                | 0              | 0.518606                | -1.830325 | 1.958202  |
| 29               | 6                | 0              | 1.889180                | -3.476897 | 0.895286  |
| 30               | 7                | 0              | 2.137423                | -4.613297 | 0.843639  |
| 31               | 7                | 0              | -0.277680               | -1.658409 | 2.789896  |
| 32               | 1                | 0              | 5.741765                | 1.178594  | -1.343614 |
| 33               | 1                | 0              | 3.694794                | -3.362223 | -0.831793 |
| 34               | 1                | 0              | 6.873278                | -0.823394 | -2.237098 |
| 35               | 1                | 0              | 5.857827                | -3.073254 | -1.989975 |
| 36               | 1                | 0              | 0.629064                | 2.030405  | 0.265027  |
| 37               | 1                | 0              | -0.733759               | -0.739467 | 0.094073  |
| 38               | 1                | 0              | -1.628865               | 2.205593  | 0.181218  |
| 39               | 1                | 0              | -2.765080               | -1.454256 | -0.138034 |
| 40               | 1                | 0              | -3.888201               | 2.721788  | -0.046501 |
| 41               | 1                | 0              | -6.254211               | 2.088253  | -0.350850 |
| 42               | 1                | 0              | -5.139951               | -2.069168 | -0.444525 |
| 43               | 1                | 0              | -8.773578               | -0.492646 | -2.006290 |
| 44               | 1                | 0              | -7.144491               | -0.305124 | -2.697831 |
| 45               | 1                | 0              | -8.249842               | 0.958976  | 0.659480  |
| 46               | 1                | 0              | -9.051507               | -0.616150 | 0.409362  |

|    |   |   |           |           |           |
|----|---|---|-----------|-----------|-----------|
| 47 | 1 | 0 | -7.624299 | -0.510139 | 1.467318  |
| 48 | 1 | 0 | -7.948826 | 1.087881  | -1.913676 |

### TS C-CAr, C-N

Standard orientation:

| Center<br>Number | Atomic<br>Number | Atomic<br>Type | Coordinates (Angstroms) |           |           |
|------------------|------------------|----------------|-------------------------|-----------|-----------|
|                  |                  |                | X                       | Y         | Z         |
| 1                | 6                | 0              | -5.193334               | 0.114120  | -1.320996 |
| 2                | 6                | 0              | -3.823200               | 2.559686  | -0.875783 |
| 3                | 6                | 0              | -5.710316               | 1.323652  | -1.794319 |
| 4                | 6                | 0              | -3.973407               | 0.126505  | -0.635173 |
| 5                | 6                | 0              | -3.290067               | 1.353778  | -0.409534 |
| 6                | 6                | 0              | -5.032342               | 2.531165  | -1.577143 |
| 7                | 6                | 0              | -3.181883               | -0.970220 | -0.058286 |
| 8                | 6                | 0              | -1.870248               | -0.387877 | 0.298778  |
| 9                | 6                | 0              | -2.066721               | 1.072289  | 0.354615  |
| 10               | 6                | 0              | -1.354382               | 1.962693  | 1.129370  |
| 11               | 6                | 0              | -3.593002               | -2.267827 | 0.159386  |
| 12               | 6                | 0              | -2.798846               | -3.235673 | 0.853588  |
| 13               | 6                | 0              | -4.876673               | -2.761373 | -0.234512 |
| 14               | 7                | 0              | -5.908614               | -3.205650 | -0.539184 |
| 15               | 7                | 0              | -2.192231               | -4.050093 | 1.422739  |
| 16               | 6                | 0              | -0.693510               | -1.087189 | 0.243608  |
| 17               | 6                | 0              | 0.651002                | -0.575798 | 0.181545  |
| 18               | 6                | 0              | 1.707469                | -1.417060 | 0.083339  |
| 19               | 6                | 0              | 3.120173                | -0.973489 | -0.035074 |
| 20               | 6                | 0              | 5.816449                | -0.157558 | -0.267021 |
| 21               | 6                | 0              | 3.911534                | -0.789311 | 1.109197  |
| 22               | 6                | 0              | 3.693630                | -0.751224 | -1.298261 |
| 23               | 6                | 0              | 5.025769                | -0.345647 | -1.411458 |
| 24               | 6                | 0              | 5.244514                | -0.383642 | 0.990214  |
| 25               | 7                | 0              | 7.196068                | 0.260414  | -0.338471 |
| 26               | 6                | 0              | 7.360477                | 1.604082  | -0.899441 |
| 27               | 6                | 0              | 8.059505                | -0.719087 | -1.003435 |
| 28               | 6                | 0              | -0.395140               | 1.551052  | 2.108302  |
| 29               | 6                | 0              | -1.606187               | 3.371868  | 1.128429  |
| 30               | 7                | 0              | -1.772633               | 4.523590  | 1.147825  |
| 31               | 7                | 0              | 0.358702                | 1.257094  | 2.944763  |
| 32               | 1                | 0              | -5.735364               | -0.808320 | -1.505290 |
| 33               | 1                | 0              | -3.312834               | 3.505852  | -0.722166 |
| 34               | 1                | 0              | -6.651180               | 1.324680  | -2.343365 |
| 35               | 1                | 0              | -5.450126               | 3.460987  | -1.961565 |
| 36               | 1                | 0              | -0.768337               | -2.167589 | 0.124343  |
| 37               | 1                | 0              | 0.827304                | 0.497820  | 0.168219  |
| 38               | 1                | 0              | 1.520554                | -2.495682 | 0.093174  |
| 39               | 1                | 0              | 3.483552                | -0.957608 | 2.097207  |
| 40               | 1                | 0              | 3.093639                | -0.893635 | -2.197340 |
| 41               | 1                | 0              | 5.446788                | -0.174314 | -2.402099 |
| 42               | 1                | 0              | 5.855930                | -0.235223 | 1.879822  |
| 43               | 1                | 0              | 8.406597                | 1.915722  | -0.777875 |
| 44               | 1                | 0              | 6.723421                | 2.311152  | -0.354582 |
| 45               | 1                | 0              | 7.856454                | -0.819212 | -2.088397 |
| 46               | 1                | 0              | 9.106907                | -0.411627 | -0.881999 |
| 47               | 1                | 0              | 7.930972                | -1.701920 | -0.534177 |
| 48               | 1                | 0              | 7.109086                | 1.663956  | -1.977241 |

10, 298 K, dichloromethane, B3LYP/aug-cc-pVDZ

**GS**

Standard orientation:

| Center<br>Number | Atomic<br>Number | Atomic<br>Type | Coordinates (Angstroms) |           |           |
|------------------|------------------|----------------|-------------------------|-----------|-----------|
|                  |                  |                | X                       | Y         | Z         |
| 1                | 6                | 0              | -1.336213               | -0.412411 | -0.000001 |
| 2                | 6                | 0              | -2.502140               | -1.140128 | 0.000000  |
| 3                | 6                | 0              | -3.855165               | -0.647794 | 0.000000  |
| 4                | 6                | 0              | -6.589145               | 0.226038  | -0.000001 |
| 5                | 6                | 0              | -4.194020               | 0.729709  | 0.000000  |
| 6                | 6                | 0              | -4.932639               | -1.567602 | 0.000000  |
| 7                | 6                | 0              | -6.255558               | -1.158608 | 0.000000  |
| 8                | 6                | 0              | -5.507965               | 1.158664  | 0.000000  |
| 9                | 7                | 0              | -7.888135               | 0.646755  | -0.000002 |
| 10               | 6                | 0              | -8.976605               | -0.324196 | 0.000001  |
| 11               | 6                | 0              | -8.205322               | 2.070773  | 0.000002  |
| 12               | 1                | 0              | -1.365199               | 0.679233  | -0.000002 |
| 13               | 1                | 0              | -2.403119               | -2.230001 | 0.000002  |
| 14               | 1                | 0              | -3.406893               | 1.482802  | 0.000001  |
| 15               | 1                | 0              | -4.713616               | -2.636484 | 0.000001  |
| 16               | 1                | 0              | -7.036812               | -1.913353 | 0.000000  |
| 17               | 1                | 0              | -5.707099               | 2.226535  | 0.000001  |
| 18               | 1                | 0              | -8.942103               | -0.966828 | 0.892851  |
| 19               | 1                | 0              | -8.942105               | -0.966830 | -0.892847 |
| 20               | 1                | 0              | -9.929363               | 0.210293  | 0.000001  |
| 21               | 1                | 0              | -7.803518               | 2.572911  | 0.893032  |
| 22               | 1                | 0              | -9.290939               | 2.191611  | 0.000003  |
| 23               | 1                | 0              | -7.803520               | 2.572914  | -0.893026 |
| 24               | 6                | 0              | -0.058648               | -1.032833 | 0.000000  |
| 25               | 6                | 0              | 1.149182                | -0.362167 | -0.000001 |
| 26               | 1                | 0              | -0.036927               | -2.127612 | 0.000000  |
| 27               | 1                | 0              | 1.165177                | 0.727759  | -0.000002 |
| 28               | 6                | 0              | 2.379984                | -1.060136 | -0.000001 |
| 29               | 6                | 0              | 3.651244                | -0.521927 | -0.000001 |
| 30               | 1                | 0              | 2.331027                | -2.154166 | -0.000001 |
| 31               | 6                | 0              | 6.036085                | -0.401884 | 0.000001  |
| 32               | 6                | 0              | 7.403973                | -0.668578 | 0.000002  |
| 33               | 6                | 0              | 8.284953                | 0.421881  | 0.000002  |
| 34               | 6                | 0              | 7.801033                | 1.740975  | 0.000001  |
| 35               | 6                | 0              | 6.423906                | 2.003583  | 0.000000  |
| 36               | 6                | 0              | 5.552138                | 0.916380  | 0.000000  |
| 37               | 1                | 0              | 7.774906                | -1.693009 | 0.000003  |
| 38               | 1                | 0              | 9.361228                | 0.247676  | 0.000004  |
| 39               | 1                | 0              | 8.509570                | 2.569698  | 0.000002  |
| 40               | 1                | 0              | 6.044687                | 3.024903  | -0.000001 |
| 41               | 6                | 0              | 4.051353                | 0.897568  | -0.000002 |
| 42               | 8                | 0              | 3.329981                | 1.895775  | -0.000003 |
| 43               | 6                | 0              | 4.874976                | -1.349165 | 0.000000  |
| 44               | 8                | 0              | 4.949908                | -2.577550 | 0.000000  |

**1, 298 K, dichloromethane, M062X/aug-cc-pVDZ****GS**

Standard orientation:

| Center<br>Number | Atomic<br>Number | Atomic<br>Type | Coordinates (Angstroms) |   |   |
|------------------|------------------|----------------|-------------------------|---|---|
|                  |                  |                | X                       | Y | Z |



|    |   |   |           |           |           |
|----|---|---|-----------|-----------|-----------|
| 1  | 6 | 0 | -5.066991 | 0.864493  | -0.000000 |
| 2  | 6 | 0 | -4.183945 | -1.838115 | 0.000000  |
| 3  | 6 | 0 | -5.981227 | -0.191567 | -0.000001 |
| 4  | 6 | 0 | -3.714199 | 0.543489  | -0.000000 |
| 5  | 6 | 0 | -3.280471 | -0.781506 | 0.000000  |
| 6  | 6 | 0 | -5.545320 | -1.524946 | -0.000000 |
| 7  | 6 | 0 | -1.780880 | -0.832640 | 0.000001  |
| 8  | 6 | 0 | -1.312083 | 0.572206  | 0.000002  |
| 9  | 6 | 0 | -2.520029 | 1.442696  | 0.000001  |
| 10 | 8 | 0 | -2.549104 | 2.660448  | 0.000001  |
| 11 | 8 | 0 | -1.141009 | -1.871387 | 0.000003  |
| 12 | 6 | 0 | -0.079364 | 1.167344  | 0.000001  |
| 13 | 6 | 0 | 1.271691  | 0.687288  | -0.000000 |
| 14 | 6 | 0 | 4.025295  | -0.061349 | -0.000009 |
| 15 | 6 | 0 | 1.661358  | -0.673736 | 0.000001  |
| 16 | 6 | 0 | 2.305135  | 1.654913  | -0.000003 |
| 17 | 6 | 0 | 3.639089  | 1.308237  | -0.000006 |
| 18 | 6 | 0 | 2.990281  | -1.040440 | -0.000002 |
| 19 | 7 | 0 | 5.331245  | -0.421529 | -0.000019 |
| 20 | 6 | 0 | 6.368986  | 0.596626  | 0.000016  |
| 21 | 6 | 0 | 5.702866  | -1.827248 | 0.000002  |
| 22 | 1 | 0 | -5.396913 | 1.901831  | -0.000001 |
| 23 | 1 | 0 | -3.837293 | -2.869994 | 0.000001  |
| 24 | 1 | 0 | -7.049669 | 0.018614  | -0.000001 |
| 25 | 1 | 0 | -6.283724 | -2.325300 | -0.000000 |
| 26 | 1 | 0 | -0.155993 | 2.260439  | 0.000001  |
| 27 | 1 | 0 | 0.893607  | -1.442158 | 0.000007  |
| 28 | 1 | 0 | 2.036687  | 2.711487  | -0.000001 |
| 29 | 1 | 0 | 4.389334  | 2.092567  | -0.000006 |
| 30 | 1 | 0 | 3.240107  | -2.097032 | 0.000002  |
| 31 | 1 | 0 | 6.298023  | 1.233211  | 0.892599  |
| 32 | 1 | 0 | 7.343762  | 0.106811  | 0.000005  |
| 33 | 1 | 0 | 6.298031  | 1.233259  | -0.892533 |
| 34 | 1 | 0 | 5.317013  | -2.338090 | 0.892638  |
| 35 | 1 | 0 | 5.316962  | -2.338124 | -0.892591 |
| 36 | 1 | 0 | 6.791113  | -1.903779 | -0.000031 |

2, 298 K, dichloromethane, M062X/aug-cc-pVDZ

**GS**

Standard orientation:

| Center<br>Number | Atomic<br>Number | Atomic<br>Type | Coordinates (Angstroms) |           |           |
|------------------|------------------|----------------|-------------------------|-----------|-----------|
|                  |                  |                | X                       | Y         | Z         |
| 1                | 6                | 0              | 4.653265                | -0.473219 | -0.251258 |
| 2                | 6                | 0              | 3.225350                | -2.918655 | -0.092192 |
| 3                | 6                | 0              | 5.310939                | -1.704503 | -0.323306 |
| 4                | 6                | 0              | 3.264185                | -0.474868 | -0.102923 |
| 5                | 6                | 0              | 2.577990                | -1.694045 | -0.030299 |
| 6                | 6                | 0              | 4.613728                | -2.914467 | -0.241226 |
| 7                | 6                | 0              | 1.114201                | -1.445965 | 0.103778  |
| 8                | 6                | 0              | 0.938907                | 0.031431  | 0.053392  |
| 9                | 6                | 0              | 2.271727                | 0.624174  | 0.017255  |
| 10               | 6                | 0              | 2.585977                | 1.954257  | 0.167494  |
| 11               | 8                | 0              | 0.270460                | -2.320126 | 0.168531  |
| 12               | 6                | 0              | -0.217768               | 0.736822  | -0.207492 |
| 13               | 6                | 0              | -1.599643               | 0.388021  | -0.135581 |

|    |   |   |           |           |           |
|----|---|---|-----------|-----------|-----------|
| 14 | 6 | 0 | -4.411755 | -0.087643 | -0.053346 |
| 15 | 6 | 0 | -2.138471 | -0.713443 | 0.576965  |
| 16 | 6 | 0 | -2.523093 | 1.264251  | -0.762952 |
| 17 | 6 | 0 | -3.879697 | 1.039342  | -0.745136 |
| 18 | 6 | 0 | -3.494121 | -0.943345 | 0.625830  |
| 19 | 7 | 0 | -5.740807 | -0.326998 | -0.026646 |
| 20 | 6 | 0 | -6.266693 | -1.469195 | 0.706153  |
| 21 | 6 | 0 | -6.660126 | 0.572258  | -0.707672 |
| 22 | 6 | 0 | 1.623867  | 2.968001  | 0.487059  |
| 23 | 6 | 0 | 3.924711  | 2.457741  | 0.093137  |
| 24 | 7 | 0 | 0.885109  | 3.815079  | 0.770261  |
| 25 | 7 | 0 | 4.990289  | 2.909766  | 0.034674  |
| 26 | 1 | 0 | 5.231433  | 0.442032  | -0.322693 |
| 27 | 1 | 0 | 2.658413  | -3.845834 | -0.027582 |
| 28 | 1 | 0 | 6.392334  | -1.718522 | -0.446697 |
| 29 | 1 | 0 | 5.159642  | -3.854717 | -0.296080 |
| 30 | 1 | 0 | -0.063537 | 1.751589  | -0.576248 |
| 31 | 1 | 0 | -1.471163 | -1.380241 | 1.111705  |
| 32 | 1 | 0 | -2.142446 | 2.142870  | -1.284019 |
| 33 | 1 | 0 | -4.538782 | 1.736783  | -1.251907 |
| 34 | 1 | 0 | -3.860124 | -1.788775 | 1.199857  |
| 35 | 1 | 0 | -5.853148 | -2.408549 | 0.316634  |
| 36 | 1 | 0 | -7.350987 | -1.492568 | 0.590136  |
| 37 | 1 | 0 | -6.030173 | -1.394792 | 1.776072  |
| 38 | 1 | 0 | -6.606139 | 1.585512  | -0.287071 |
| 39 | 1 | 0 | -6.435269 | 0.622293  | -1.781162 |
| 40 | 1 | 0 | -7.676749 | 0.197291  | -0.583294 |

### 3, 298 K, dichloromethane, M062X/aug-cc-pVDZ

#### GS

Standard orientation:

| Center<br>Number | Atomic<br>Number | Atomic<br>Type | Coordinates (Angstroms) |           |           |
|------------------|------------------|----------------|-------------------------|-----------|-----------|
|                  |                  |                | X                       | Y         | Z         |
| 1                | 6                | 0              | -4.402860               | -0.256625 | -1.052351 |
| 2                | 6                | 0              | -2.901655               | -2.611667 | -0.575759 |
| 3                | 6                | 0              | -4.906000               | -1.512650 | -1.397341 |
| 4                | 6                | 0              | -3.133875               | -0.183671 | -0.479206 |
| 5                | 6                | 0              | -2.389732               | -1.360204 | -0.241259 |
| 6                | 6                | 0              | -4.165532               | -2.673727 | -1.165628 |
| 7                | 6                | 0              | -1.106545               | -0.977968 | 0.373288  |
| 8                | 6                | 0              | -0.973693               | 0.474050  | 0.216211  |
| 9                | 6                | 0              | -2.329589               | 0.978496  | -0.046116 |
| 10               | 6                | 0              | -2.798632               | 2.255095  | 0.124630  |
| 11               | 6                | 0              | -0.320969               | -1.784009 | 1.152633  |
| 12               | 6                | 0              | 0.160915                | 1.247384  | 0.120534  |
| 13               | 6                | 0              | 1.525253                | 0.876372  | -0.105769 |
| 14               | 6                | 0              | 4.282716                | 0.301941  | -0.539922 |
| 15               | 6                | 0              | 1.939161                | -0.353981 | -0.669696 |
| 16               | 6                | 0              | 2.532144                | 1.829359  | 0.175156  |
| 17               | 6                | 0              | 3.869630                | 1.556406  | -0.007869 |
| 18               | 6                | 0              | 3.265966                | -0.635162 | -0.894646 |
| 19               | 7                | 0              | 5.589911                | 0.014969  | -0.725101 |
| 20               | 6                | 0              | 6.608781                | 0.992964  | -0.375525 |
| 21               | 6                | 0              | 5.987884                | -1.264699 | -1.292169 |
| 22               | 6                | 0              | -2.011811               | 3.316668  | 0.678785  |
| 23               | 6                | 0              | -4.147491               | 2.639627  | -0.166999 |

|    |   |   |           |           |           |
|----|---|---|-----------|-----------|-----------|
| 24 | 7 | 0 | -1.401828 | 4.190635  | 1.132942  |
| 25 | 7 | 0 | -5.228315 | 2.991673  | -0.390802 |
| 26 | 6 | 0 | 0.754146  | -1.272591 | 1.949387  |
| 27 | 7 | 0 | 1.604647  | -0.877301 | 2.628540  |
| 28 | 6 | 0 | -0.574536 | -3.183215 | 1.326578  |
| 29 | 7 | 0 | -0.750935 | -4.317691 | 1.480899  |
| 30 | 1 | 0 | -4.996263 | 0.629384  | -1.252726 |
| 31 | 1 | 0 | -2.335503 | -3.523823 | -0.413314 |
| 32 | 1 | 0 | -5.887967 | -1.583803 | -1.860832 |
| 33 | 1 | 0 | -4.574839 | -3.640321 | -1.452959 |
| 34 | 1 | 0 | 0.006863  | 2.325674  | 0.142790  |
| 35 | 1 | 0 | 1.196301  | -1.087819 | -0.975739 |
| 36 | 1 | 0 | 2.240874  | 2.803014  | 0.569298  |
| 37 | 1 | 0 | 4.602488  | 2.315664  | 0.245188  |
| 38 | 1 | 0 | 3.530871  | -1.581399 | -1.355674 |
| 39 | 1 | 0 | 7.591673  | 0.564839  | -0.576263 |
| 40 | 1 | 0 | 6.551688  | 1.252867  | 0.689674  |
| 41 | 1 | 0 | 5.588258  | -1.388580 | -2.307800 |
| 42 | 1 | 0 | 7.076797  | -1.304355 | -1.340276 |
| 43 | 1 | 0 | 6.497129  | 1.909872  | -0.970136 |
| 44 | 1 | 0 | 5.635225  | -2.096372 | -0.668262 |

#### 4, 298 K, dichloromethane, M062X/aug-cc-pVDZ

### GS

Standard orientation:

| Center<br>Number | Atomic<br>Number | Atomic<br>Type | Coordinates (Angstroms) |           |           |
|------------------|------------------|----------------|-------------------------|-----------|-----------|
|                  |                  |                | X                       | Y         | Z         |
| 1                | 6                | 0              | -5.817762               | -0.953003 | 0.044407  |
| 2                | 6                | 0              | -4.961316               | 1.757450  | 0.009240  |
| 3                | 6                | 0              | -6.742627               | 0.094237  | 0.051488  |
| 4                | 6                | 0              | -4.468610               | -0.619042 | 0.019697  |
| 5                | 6                | 0              | -4.047790               | 0.709874  | 0.002425  |
| 6                | 6                | 0              | -6.319888               | 1.431397  | 0.034116  |
| 7                | 6                | 0              | -2.547934               | 0.774034  | -0.022657 |
| 8                | 6                | 0              | -2.067022               | -0.624637 | -0.019172 |
| 9                | 6                | 0              | -3.264425               | -1.505888 | 0.007167  |
| 10               | 8                | 0              | -3.283281               | -2.724592 | 0.017499  |
| 11               | 8                | 0              | -1.919287               | 1.820310  | -0.041798 |
| 12               | 6                | 0              | -0.826354               | -1.209695 | -0.033354 |
| 13               | 6                | 0              | 0.518109                | -0.721422 | -0.056621 |
| 14               | 6                | 0              | 3.254368                | 0.042511  | -0.073417 |
| 15               | 6                | 0              | 1.557878                | -1.681572 | -0.062485 |
| 16               | 6                | 0              | 0.898007                | 0.640879  | -0.073179 |
| 17               | 6                | 0              | 2.220807                | 1.030915  | -0.091217 |
| 18               | 6                | 0              | 2.893250                | -1.339276 | -0.079899 |
| 19               | 7                | 0              | 4.566547                | 0.413547  | -0.037773 |
| 20               | 6                | 0              | 4.962018                | 1.809939  | -0.188318 |
| 21               | 6                | 0              | 5.633344                | -0.572123 | -0.176632 |
| 22               | 6                | 0              | 2.580538                | 2.498349  | -0.135935 |
| 23               | 6                | 0              | 3.956069                | 2.737613  | 0.472334  |
| 24               | 6                | 0              | 3.964159                | -2.405180 | -0.109279 |
| 25               | 6                | 0              | 5.259789                | -1.882312 | 0.496941  |
| 26               | 1                | 0              | -6.137554               | -1.993501 | 0.057774  |
| 27               | 1                | 0              | -4.625071               | 2.792745  | -0.004382 |
| 28               | 1                | 0              | -7.808799               | -0.126523 | 0.070844  |
| 29               | 1                | 0              | -7.065866               | 2.224717  | 0.040241  |

|    |   |   |           |           |           |
|----|---|---|-----------|-----------|-----------|
| 30 | 1 | 0 | -0.895119 | -2.303300 | -0.023536 |
| 31 | 1 | 0 | 1.293339  | -2.740570 | -0.053656 |
| 32 | 1 | 0 | 0.122404  | 1.402922  | -0.073472 |
| 33 | 1 | 0 | 5.949548  | 1.919984  | 0.272894  |
| 34 | 1 | 0 | 5.063366  | 2.060877  | -1.257797 |
| 35 | 1 | 0 | 6.532185  | -0.145610 | 0.281749  |
| 36 | 1 | 0 | 5.852743  | -0.743952 | -1.244057 |
| 37 | 1 | 0 | 1.810409  | 3.076195  | 0.387306  |
| 38 | 1 | 0 | 2.584036  | 2.842741  | -1.180551 |
| 39 | 1 | 0 | 3.934164  | 2.534808  | 1.551197  |
| 40 | 1 | 0 | 4.272434  | 3.776260  | 0.327894  |
| 41 | 1 | 0 | 3.609082  | -3.293391 | 0.425663  |
| 42 | 1 | 0 | 4.150625  | -2.710618 | -1.149249 |
| 43 | 1 | 0 | 5.131635  | -1.709596 | 1.573614  |
| 44 | 1 | 0 | 6.073510  | -2.603051 | 0.362434  |

## 6, 298 K, dichloromethane, M062X/aug-cc-pVDZ

### GS

Standard orientation:

| Center<br>Number | Atomic<br>Number | Atomic<br>Type | Coordinates (Angstroms) |           |           |
|------------------|------------------|----------------|-------------------------|-----------|-----------|
|                  |                  |                | X                       | Y         | Z         |
| 1                | 6                | 0              | 2.332085                | 0.373549  | 0.014243  |
| 2                | 1                | 0              | 2.387680                | 1.454542  | 0.056992  |
| 3                | 6                | 0              | 1.149880                | -0.280846 | -0.022672 |
| 4                | 1                | 0              | 1.186441                | -1.368444 | -0.066419 |
| 5                | 6                | 0              | -0.146353               | 0.308010  | -0.007189 |
| 6                | 1                | 0              | -0.224825               | 1.385793  | 0.039517  |
| 7                | 6                | 0              | -1.259666               | -0.475701 | -0.047556 |
| 8                | 1                | 0              | -1.137303               | -1.553388 | -0.074072 |
| 9                | 6                | 0              | 3.571587                | -0.367542 | -0.002331 |
| 10               | 8                | 0              | 4.686454                | 0.117005  | 0.028772  |
| 11               | 1                | 0              | 3.450336                | -1.467866 | -0.047444 |
| 12               | 7                | 0              | -2.534282               | -0.059271 | -0.069491 |
| 13               | 6                | 0              | -2.828925               | 1.356237  | -0.000477 |
| 14               | 1                | 0              | -3.899110               | 1.502669  | -0.116764 |
| 15               | 1                | 0              | -2.514620               | 1.779166  | 0.957772  |
| 16               | 1                | 0              | -2.312057               | 1.889373  | -0.799261 |
| 17               | 6                | 0              | -3.637844               | -0.988000 | 0.067175  |
| 18               | 1                | 0              | -4.107677               | -0.899841 | 1.049773  |
| 19               | 1                | 0              | -4.390945               | -0.792492 | -0.696254 |
| 20               | 1                | 0              | -3.274171               | -2.004889 | -0.054736 |

## 7, 298 K, dichloromethane, M062X/aug-cc-pVDZ

### GS

Standard orientation:

| Center<br>Number | Atomic<br>Number | Atomic<br>Type | Coordinates (Angstroms) |           |           |
|------------------|------------------|----------------|-------------------------|-----------|-----------|
|                  |                  |                | X                       | Y         | Z         |
| 1                | 6                | 0              | 6.213185                | -0.635295 | -0.000043 |
| 2                | 6                | 0              | 5.123696                | 1.990714  | -0.000028 |
| 3                | 6                | 0              | 7.043074                | 0.488613  | -0.000045 |
| 4                | 6                | 0              | 4.839485                | -0.422330 | -0.000034 |

|    |   |   |           |           |           |
|----|---|---|-----------|-----------|-----------|
| 5  | 6 | 0 | 4.303730  | 0.868143  | -0.000025 |
| 6  | 6 | 0 | 6.505453  | 1.784072  | -0.000038 |
| 7  | 6 | 0 | 2.805085  | 0.792112  | -0.000009 |
| 8  | 6 | 0 | 2.461968  | -0.645577 | -0.000019 |
| 9  | 6 | 0 | 3.722205  | -1.420968 | -0.000036 |
| 10 | 6 | 0 | 1.226335  | -1.224604 | -0.000013 |
| 11 | 6 | 0 | -0.029015 | -0.547964 | 0.000002  |
| 12 | 6 | 0 | -1.189873 | -1.265743 | 0.000005  |
| 13 | 6 | 0 | -2.538320 | -0.751737 | 0.000019  |
| 14 | 6 | 0 | -5.237896 | 0.167873  | 0.000048  |
| 15 | 6 | 0 | -2.842720 | 0.626754  | 0.000030  |
| 16 | 6 | 0 | -3.622683 | -1.651307 | 0.000018  |
| 17 | 6 | 0 | -4.936215 | -1.219797 | 0.000030  |
| 18 | 6 | 0 | -4.145237 | 1.081105  | 0.000044  |
| 19 | 8 | 0 | 3.847406  | -2.632973 | -0.000049 |
| 20 | 8 | 0 | 2.051700  | 1.751302  | 0.000008  |
| 21 | 7 | 0 | -6.522508 | 0.611175  | 0.000071  |
| 22 | 6 | 0 | -7.619030 | -0.340985 | 0.000024  |
| 23 | 6 | 0 | -6.803783 | 2.036326  | 0.000035  |
| 24 | 1 | 0 | 6.622452  | -1.644085 | -0.000050 |
| 25 | 1 | 0 | 4.699052  | 2.993169  | -0.000021 |
| 26 | 1 | 0 | 8.124578  | 0.361641  | -0.000052 |
| 27 | 1 | 0 | 7.179440  | 2.639408  | -0.000040 |
| 28 | 1 | 0 | 1.206800  | -2.319269 | -0.000021 |
| 29 | 1 | 0 | -0.024899 | 0.540098  | 0.000010  |
| 30 | 1 | 0 | -1.103244 | -2.356508 | -0.000004 |
| 31 | 1 | 0 | -2.038000 | 1.360242  | 0.000028  |
| 32 | 1 | 0 | -3.419775 | -2.722657 | 0.000005  |
| 33 | 1 | 0 | -5.733244 | -1.956813 | 0.000025  |
| 34 | 1 | 0 | -4.327272 | 2.151316  | 0.000049  |
| 35 | 1 | 0 | -7.587921 | -0.982028 | 0.892284  |
| 36 | 1 | 0 | -7.587931 | -0.981939 | -0.892302 |
| 37 | 1 | 0 | -8.562791 | 0.206641  | 0.000059  |
| 38 | 1 | 0 | -6.387012 | 2.523785  | 0.892454  |
| 39 | 1 | 0 | -7.885122 | 2.181979  | 0.000067  |
| 40 | 1 | 0 | -6.387066 | 2.523737  | -0.892438 |

8, 298 K, dichloromethane, M062X/aug-cc-pVDZ

GS

Standard orientation:

| Center<br>Number | Atomic<br>Number | Atomic<br>Type | Coordinates (Angstroms) |           |           |
|------------------|------------------|----------------|-------------------------|-----------|-----------|
|                  |                  |                | X                       | Y         | Z         |
| 1                | 6                | 0              | -5.650298               | -0.598989 | -0.000002 |
| 2                | 6                | 0              | -4.140238               | -2.997877 | 0.000009  |
| 3                | 6                | 0              | -6.273587               | -1.850298 | 0.000001  |
| 4                | 6                | 0              | -4.253624               | -0.554103 | -0.000000 |
| 5                | 6                | 0              | -3.528639               | -1.753507 | 0.000005  |
| 6                | 6                | 0              | -5.535685               | -3.038368 | 0.000007  |
| 7                | 6                | 0              | -3.292579               | 0.585791  | -0.000003 |
| 8                | 6                | 0              | -1.946692               | 0.027839  | 0.000000  |
| 9                | 6                | 0              | -2.071795               | -1.452725 | 0.000005  |
| 10               | 8                | 0              | -1.181525               | -2.284493 | 0.000010  |
| 11               | 6                | 0              | -3.663146               | 1.911087  | -0.000005 |
| 12               | 6                | 0              | -2.736055               | 3.002431  | -0.000003 |
| 13               | 6                | 0              | -5.025040               | 2.353825  | -0.000006 |
| 14               | 7                | 0              | -6.107623               | 2.768020  | -0.000008 |

|    |   |   |           |           |           |
|----|---|---|-----------|-----------|-----------|
| 15 | 7 | 0 | -2.021338 | 3.915060  | -0.000002 |
| 16 | 6 | 0 | -0.744144 | 0.703953  | -0.000002 |
| 17 | 6 | 0 | 0.549236  | 0.122423  | 0.000000  |
| 18 | 6 | 0 | 1.648364  | 0.943879  | -0.000003 |
| 19 | 6 | 0 | 3.028618  | 0.551029  | -0.000002 |
| 20 | 6 | 0 | 5.797401  | -0.126217 | -0.000000 |
| 21 | 6 | 0 | 3.453637  | -0.797973 | 0.000004  |
| 22 | 6 | 0 | 4.031036  | 1.545238  | -0.000007 |
| 23 | 6 | 0 | 5.374878  | 1.231757  | -0.000006 |
| 24 | 6 | 0 | 4.788963  | -1.134879 | 0.000005  |
| 25 | 7 | 0 | 7.112541  | -0.452792 | 0.000000  |
| 26 | 6 | 0 | 8.122363  | 0.592837  | -0.000006 |
| 27 | 6 | 0 | 7.521448  | -1.848082 | 0.000007  |
| 28 | 1 | 0 | -6.264531 | 0.294755  | -0.000008 |
| 29 | 1 | 0 | -3.539929 | -3.906128 | 0.000013  |
| 30 | 1 | 0 | -7.361065 | -1.896815 | -0.000001 |
| 31 | 1 | 0 | -6.055065 | -3.995068 | 0.000010  |
| 32 | 1 | 0 | -0.758627 | 1.793088  | -0.000006 |
| 33 | 1 | 0 | 0.644436  | -0.959084 | 0.000004  |
| 34 | 1 | 0 | 1.466996  | 2.023047  | -0.000008 |
| 35 | 1 | 0 | 2.716561  | -1.599204 | 0.000008  |
| 36 | 1 | 0 | 3.732402  | 2.593714  | -0.000012 |
| 37 | 1 | 0 | 6.104618  | 2.035146  | -0.000010 |
| 38 | 1 | 0 | 5.066062  | -2.184371 | 0.000010  |
| 39 | 1 | 0 | 9.109945  | 0.129538  | -0.000006 |
| 40 | 1 | 0 | 8.034011  | 1.227266  | -0.892605 |
| 41 | 1 | 0 | 8.034014  | 1.227274  | 0.892587  |
| 42 | 1 | 0 | 7.149704  | -2.369097 | 0.892807  |
| 43 | 1 | 0 | 7.149704  | -2.369106 | -0.892788 |
| 44 | 1 | 0 | 8.611368  | -1.895456 | 0.000007  |

9, 298 K, dichloromethane, M062X/aug-cc-pVDZ

GS

Standard orientation:

| Center<br>Number | Atomic<br>Number | Atomic<br>Type | Coordinates (Angstroms) |           |           |
|------------------|------------------|----------------|-------------------------|-----------|-----------|
|                  |                  |                | X                       | Y         | Z         |
| 1                | 6                | 0              | -5.305962               | -0.084043 | -1.140923 |
| 2                | 6                | 0              | -4.055129               | 2.438636  | -0.837523 |
| 3                | 6                | 0              | -5.921871               | 1.083119  | -1.598920 |
| 4                | 6                | 0              | -4.050515               | 0.016990  | -0.544542 |
| 5                | 6                | 0              | -3.430259               | 1.277140  | -0.390125 |
| 6                | 6                | 0              | -5.304178               | 2.325986  | -1.452845 |
| 7                | 6                | 0              | -3.147555               | -1.021663 | -0.004820 |
| 8                | 6                | 0              | -1.873745               | -0.361383 | 0.285100  |
| 9                | 6                | 0              | -2.136027               | 1.074192  | 0.290203  |
| 10               | 6                | 0              | -1.417636               | 2.034078  | 0.957607  |
| 11               | 6                | 0              | -3.471812               | -2.334927 | 0.221687  |
| 12               | 6                | 0              | -2.591882               | -3.252200 | 0.883133  |
| 13               | 6                | 0              | -4.743187               | -2.900949 | -0.116046 |
| 14               | 7                | 0              | -5.758000               | -3.396113 | -0.375800 |
| 15               | 7                | 0              | -1.903507               | -4.010421 | 1.425048  |
| 16               | 6                | 0              | -0.647702               | -0.998864 | 0.238709  |
| 17               | 6                | 0              | 0.635078                | -0.421323 | 0.102895  |
| 18               | 6                | 0              | 1.740557                | -1.233593 | 0.039833  |
| 19               | 6                | 0              | 3.105936                | -0.827761 | -0.105865 |
| 20               | 6                | 0              | 5.851479                | -0.123701 | -0.400809 |

|    |   |   |           |           |           |
|----|---|---|-----------|-----------|-----------|
| 21 | 6 | 0 | 3.515128  | 0.526311  | -0.154013 |
| 22 | 6 | 0 | 4.114062  | -1.813086 | -0.201172 |
| 23 | 6 | 0 | 5.445829  | -1.486675 | -0.346589 |
| 24 | 6 | 0 | 4.838329  | 0.875921  | -0.296643 |
| 25 | 7 | 0 | 7.153993  | 0.215732  | -0.542225 |
| 26 | 6 | 0 | 8.170736  | -0.819375 | -0.638931 |
| 27 | 6 | 0 | 7.547509  | 1.615459  | -0.583673 |
| 28 | 6 | 0 | -0.375926 | 1.714756  | 1.887567  |
| 29 | 6 | 0 | -1.744728 | 3.428285  | 0.905924  |
| 30 | 7 | 0 | -1.975491 | 4.563203  | 0.877275  |
| 31 | 7 | 0 | 0.449257  | 1.478296  | 2.665453  |
| 32 | 1 | 0 | -5.805838 | -1.038138 | -1.272036 |
| 33 | 1 | 0 | -3.590344 | 3.414653  | -0.739574 |
| 34 | 1 | 0 | -6.894949 | 1.018116  | -2.081643 |
| 35 | 1 | 0 | -5.798603 | 3.220979  | -1.825518 |
| 36 | 1 | 0 | -0.661524 | -2.087881 | 0.201851  |
| 37 | 1 | 0 | 0.744329  | 0.655252  | 0.010714  |
| 38 | 1 | 0 | 1.571844  | -2.311645 | 0.112109  |
| 39 | 1 | 0 | 2.776133  | 1.321286  | -0.067925 |
| 40 | 1 | 0 | 3.828514  | -2.864260 | -0.159309 |
| 41 | 1 | 0 | 6.180341  | -2.282616 | -0.415945 |
| 42 | 1 | 0 | 5.104327  | 1.927844  | -0.323380 |
| 43 | 1 | 0 | 9.146225  | -0.345613 | -0.756129 |
| 44 | 1 | 0 | 7.990820  | -1.467596 | -1.507178 |
| 45 | 1 | 0 | 8.630608  | 1.672963  | -0.699757 |
| 46 | 1 | 0 | 7.077727  | 2.132310  | -1.431281 |
| 47 | 1 | 0 | 7.267942  | 2.132107  | 0.344458  |
| 48 | 1 | 0 | 8.189499  | -1.440592 | 0.266971  |

---
