# Supplementary material for: Conjugated donor–acceptor substituted systems involving the 1,3-indandione-derived electron accepting moieties
Source: Royal Society of Chemistry journal article supplement (doi:10.1039/d2ra05335g), 2022-01-01
Supplement: d2ra05335g2.pdf [file d2ra05335g2.pdf]

## Conjugated Donor-Acceptor Molecular Systems Involving the 1,3-Indandione-Derived Electron Accepting Moieties.

M. Sigalov,<sup>a</sup> R. Mazor,<sup>a1</sup> A. Ellern,<sup>b</sup> N. Larina,<sup>c2</sup> V. Lokshin<sup>c</sup> and V. Khodorkovsky.<sup>c</sup>

<sup>a</sup> Dept. of Chemistry, Ben-Gurion Univ. of the Negev, Beer-Sheva, 84105, Israel.

<sup>b</sup> Chemistry Department, Iowa State University, 1711, Ames, IA, 50011, USA.

<sup>c</sup> Aix Marseille Université, CNRS, CINaM UMR 7325, 13288, Marseille, France. E-mail:

[vladimir.khodorkovsky@univ-amu.fr](mailto:vladimir.khodorkovsky@univ-amu.fr)

### Synthesis of 2-(4-(diisopropylamino)benzylidene)-1H-indene-1,3(2H)-dione (1c).

To the mixture of 0.146 g (1 mmol) of 1,3-indandione and 0.205 g (1 mmol) of 4-N-diisopropylaminobenzaldehyde in 20 ml of acetic acid were added three drops of concentrated HCl, the solution was refluxed for 30 min, cooled to room temperature and poured into ice water. The precipitate formed was filtered off and washed with cold ethanol. Red solid, yield 0.23 g (66%), m.p. 177-178°C, from ethanol. <sup>1</sup>H NMR, CDCl<sub>3</sub>, δ, ppm: 8.46 d (2H, H-2',6'); 7.86 m (2H, 5,6-H); 7.72 m (2H, H-4,7); 7.69 s (1H, =CH); 6.91 d (2H, J = (9.3 Hz, H-3',5')); 4.08 m (2H, CH-*i*-Pr); 1.36 d (12H, J = 6.8 Hz, CH<sub>3</sub>). <sup>13</sup>C NMR, CDCl<sub>3</sub>, δ, ppm: 191.3; 189.8; 152.9; 146.7; 142.2; 137.4; 134.2; 134.0; 122.5; 122.2; 122.1; 121.5; 114.2; 48.1; 20.5.

Calculated: C 79.25%, H 6.95%, N 4.20%. Found: C 79.14%, H 7.02%, N 4.17%.

### Synthesis of 1,3-bis-dicyanovinyl-2-(4-diisopropylaminobenzylidene)-indane (3c).

The mixture of 0.24 g (1 mmol) of 1,3-bisdicyanovinylindane and 0.25 g (1.2 mmol) of 4-N-diisopropylaminobenzaldehyde in 10 ml of acetic anhydride was heated at 70°C for 2h and cooled. The precipitated solid was filtered off, washed with diethyl ether and dried. Dark-green solid, yield 0.35 g (74%), m.p. 240-242°C, from acetonitrile. <sup>1</sup>H NMR, CDCl<sub>3</sub>, δ, ppm: 8.63 s (1H, =CH); 8.54 m (2H, 4,7-H); 7.72 m (2H, 5,6-H); 7.55 d (2H, J = 9.3 Hz, H-2',6'); 6.92 d (2H, J = (9.3 Hz, H-3',5')); 4.14 m (2H, CH-*i*-Pr); 1.40 d (12H, J = 6.8 Hz, CH<sub>3</sub>). <sup>13</sup>C NMR, CDCl<sub>3</sub>, δ, ppm: 161.4; 153.6; 146.5; 137.7; 146.5; 137.7; 133.7; 125.1; 122.8; 122.3; 115.2; 114.6; 114.2; 69.6; 48.8; 20.9.

Calculated: C 78.30%, H 5.40%, N 16.31%. Found: 78.21%, H 5.42%, N 16.35%.

<sup>1</sup> Present address: Dept HERA, ICL Group, Beer Sheva, 84101, Israel.

<sup>2</sup> Present address: Thales DIS France SAS, Avenue du Pic de Bertagne, 13420 Gémenos, France

## NMR spectra

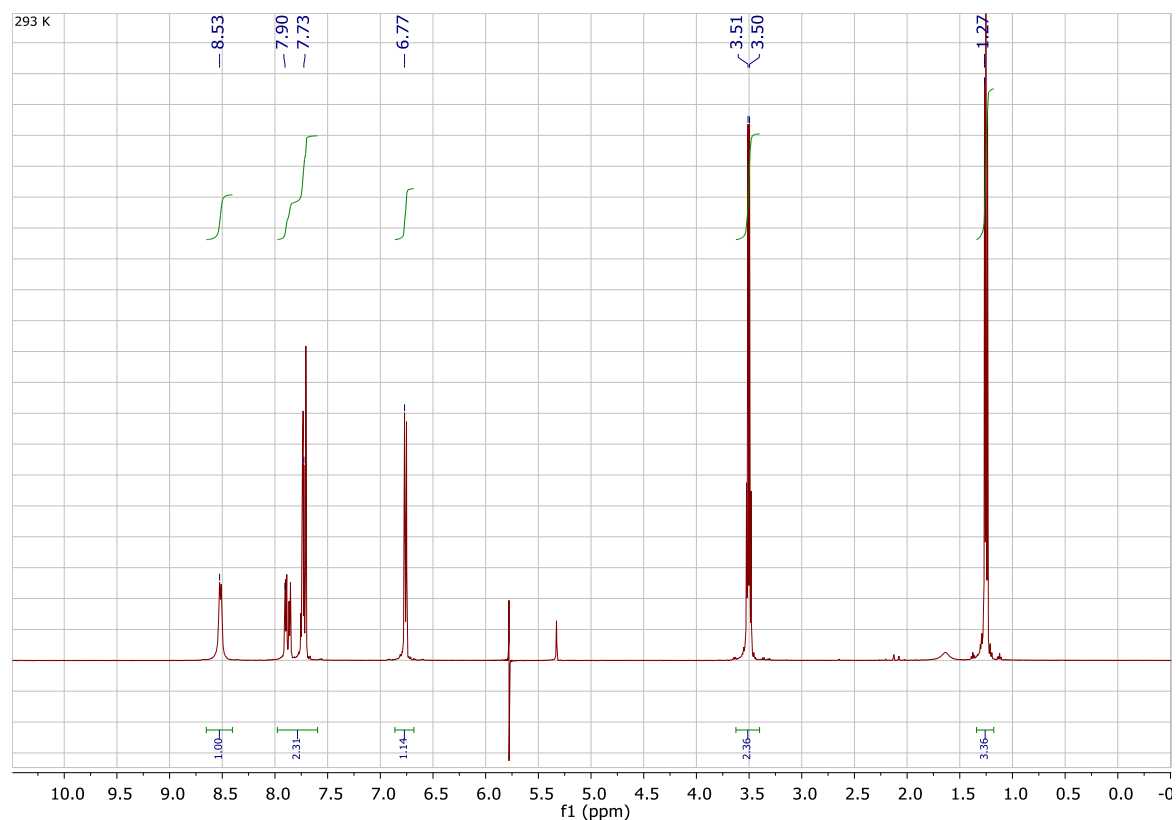

Fig. S1.  $^1\text{H}$  NMR spectrum of **1b** in  $\text{CD}_2\text{Cl}_2$ .

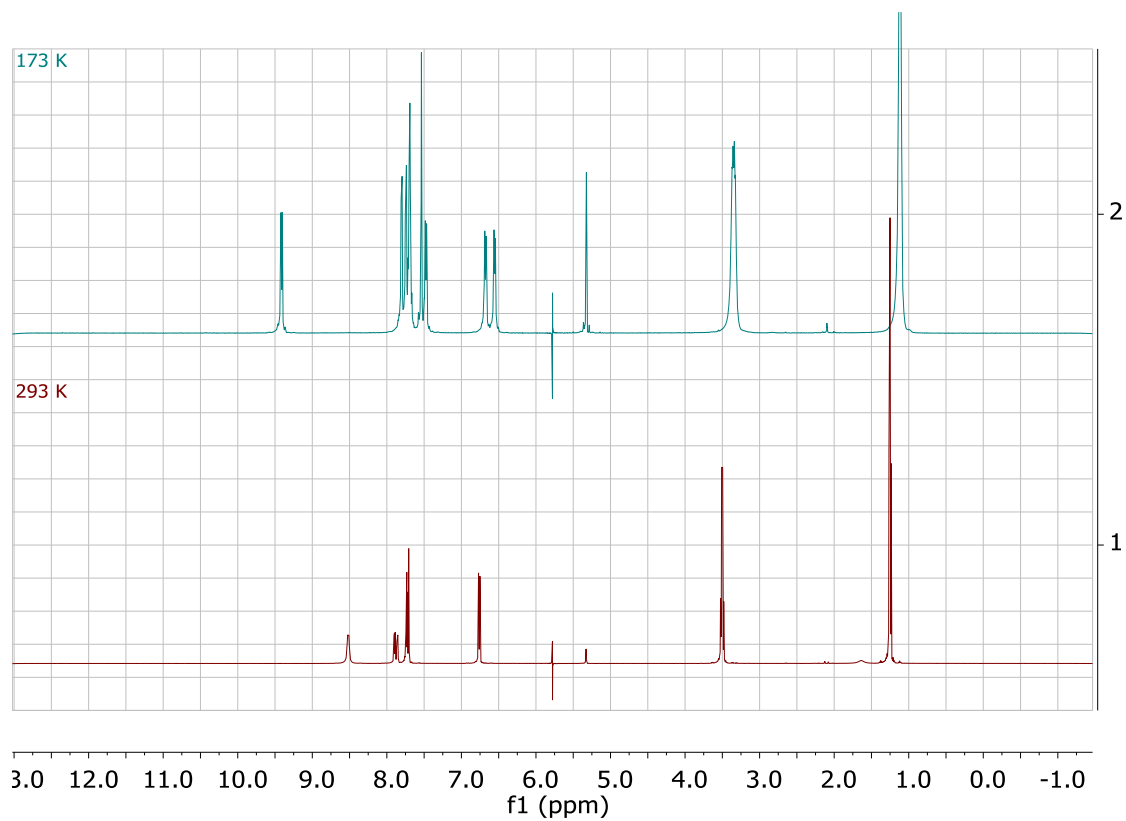

Fig. S2. Variable temperature  $^1\text{H}$  NMR spectra of **1b** in  $\text{CD}_2\text{Cl}_2$  at RT (brown) and 173 K (green).

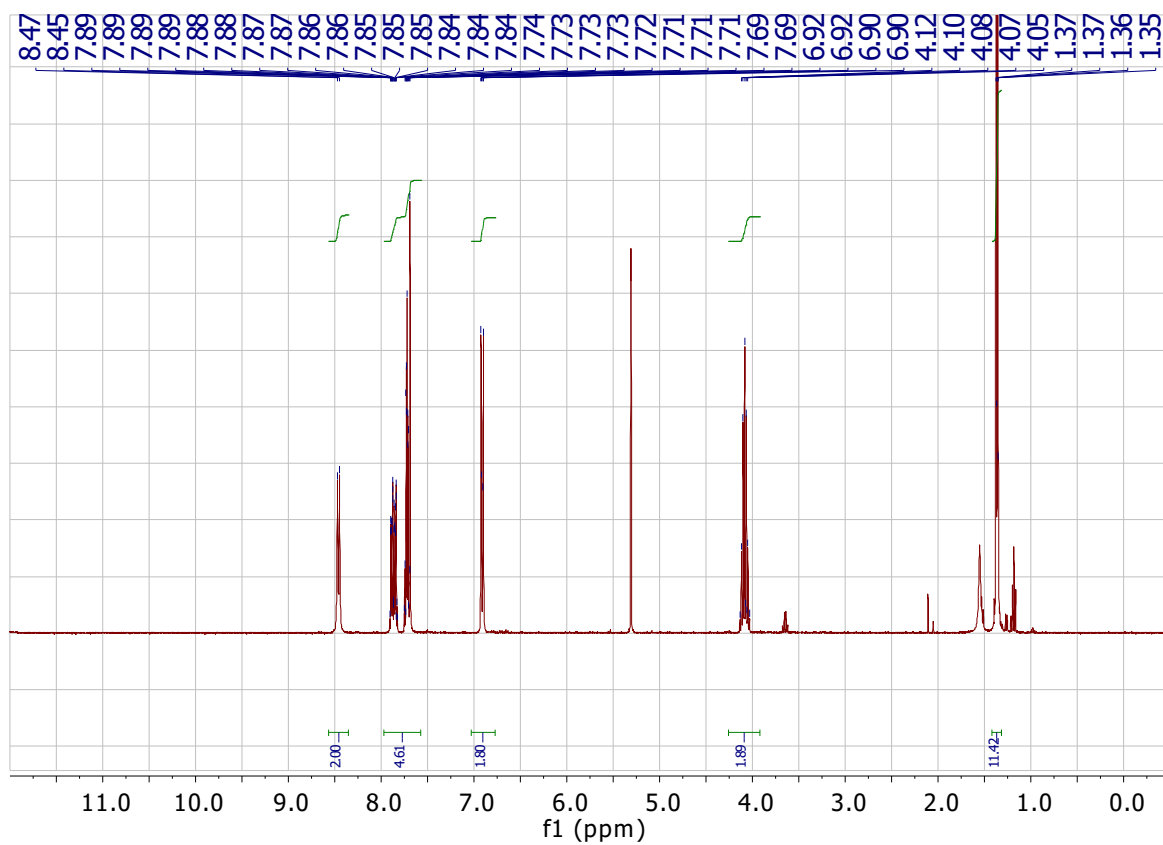

Fig. S3.  $^1\text{H}$  NMR spectrum of **1c** in  $\text{CD}_2\text{Cl}_2$ .

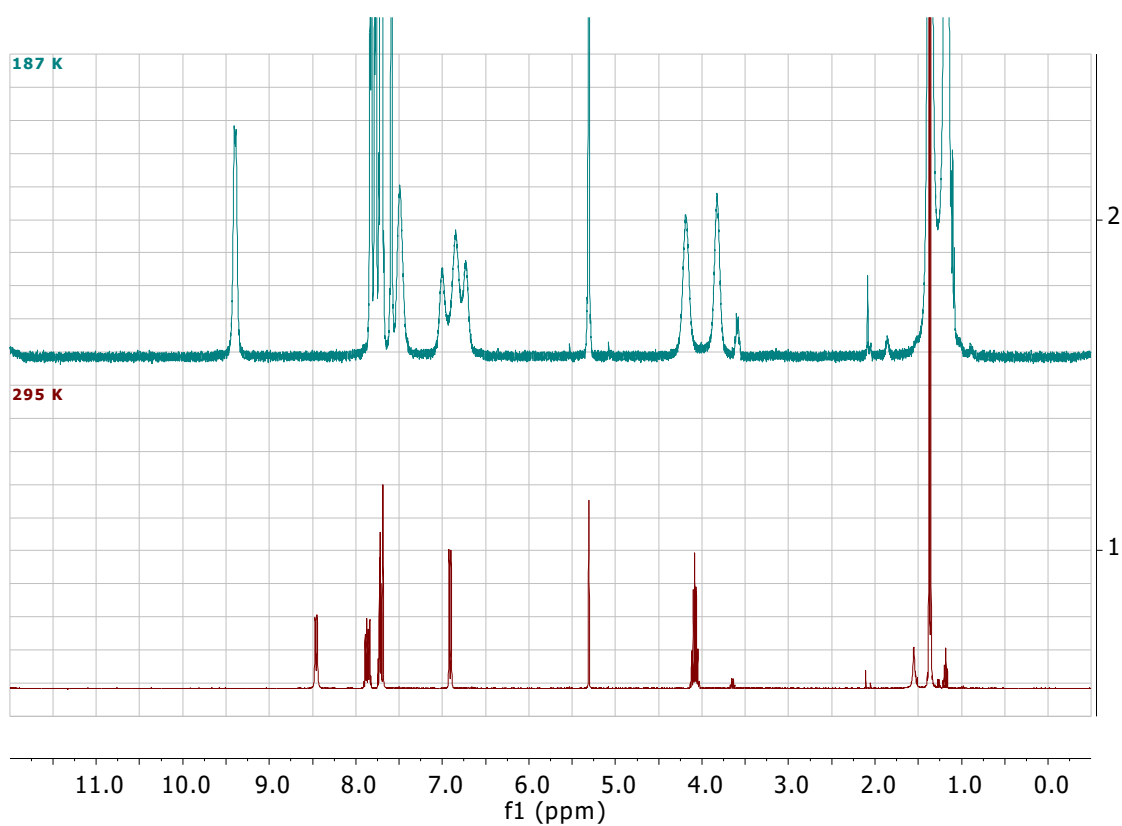

Fig. S4. Variable temperature  $^1\text{H}$ -NMR spectra of **1c** in  $\text{CD}_2\text{Cl}_2$  at RT (brown) 233 K (green) and 187 K (blue).

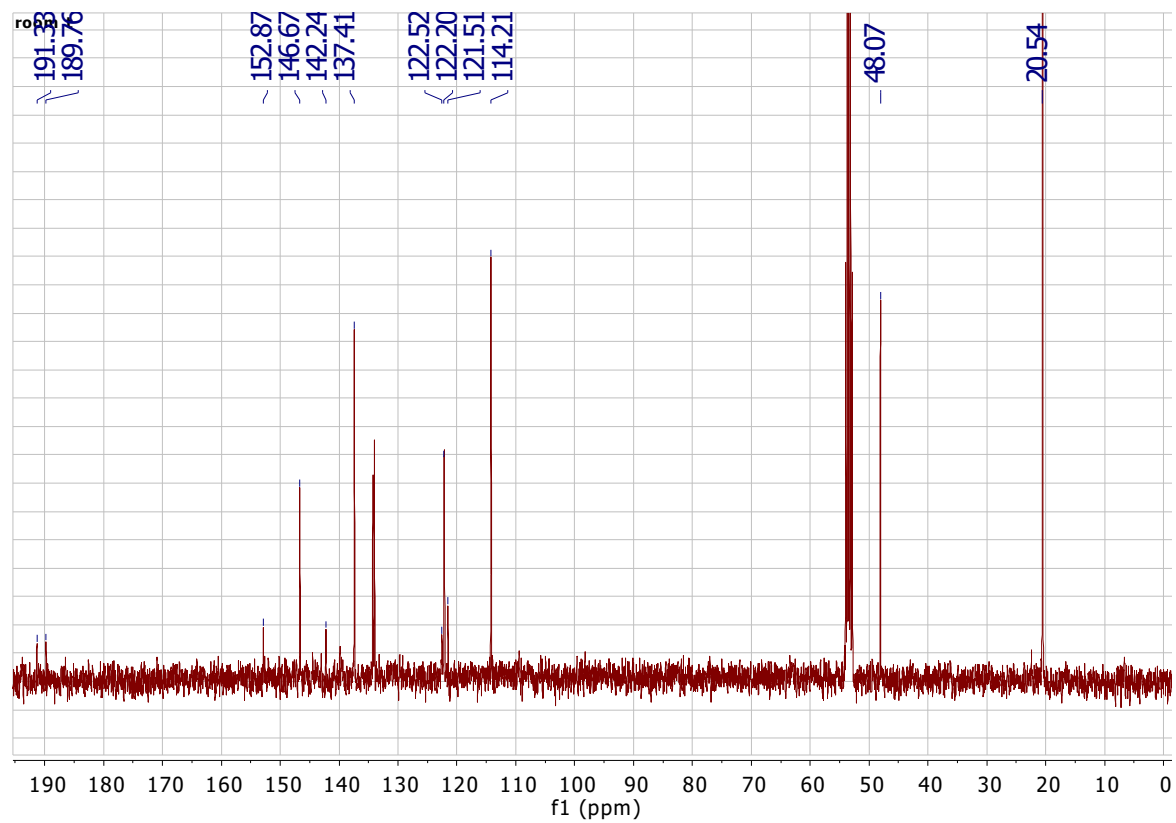

Fig. S5.  $^{13}\text{C}$  NMR spectrum of **1c** in  $\text{CD}_2\text{Cl}_2$ .

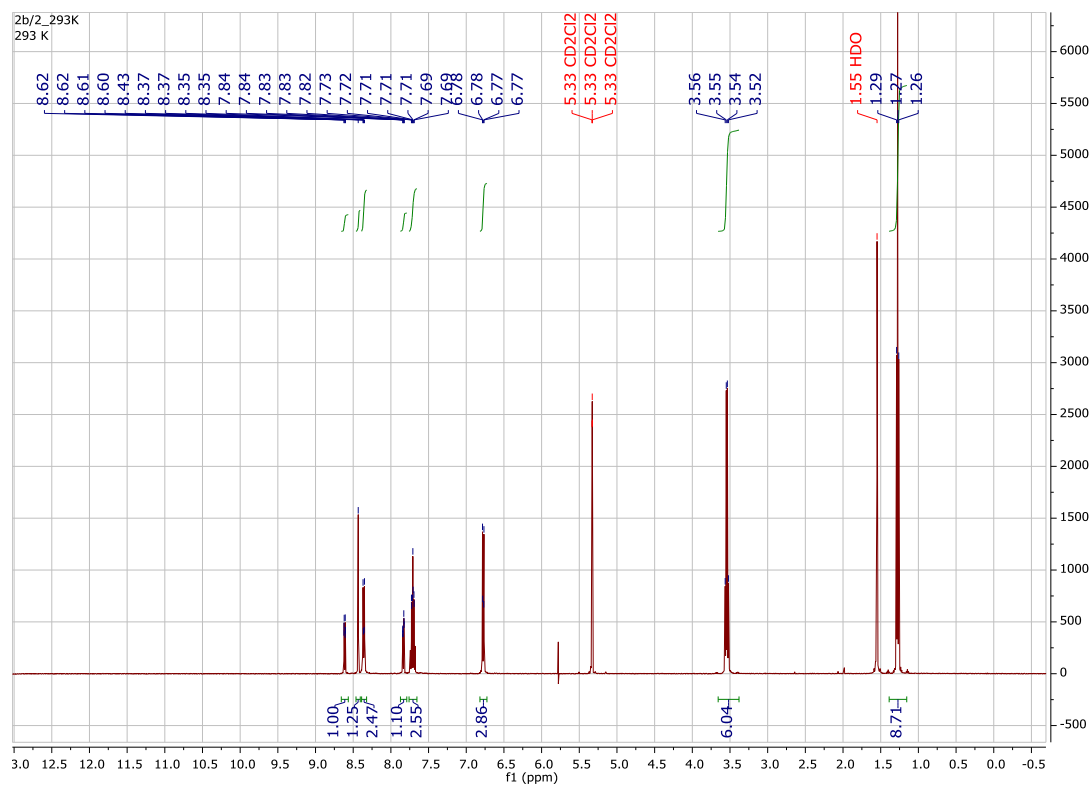

Fig. S6. <sup>1</sup>H NMR spectrum of **2b** in CD<sub>2</sub>Cl<sub>2</sub>.

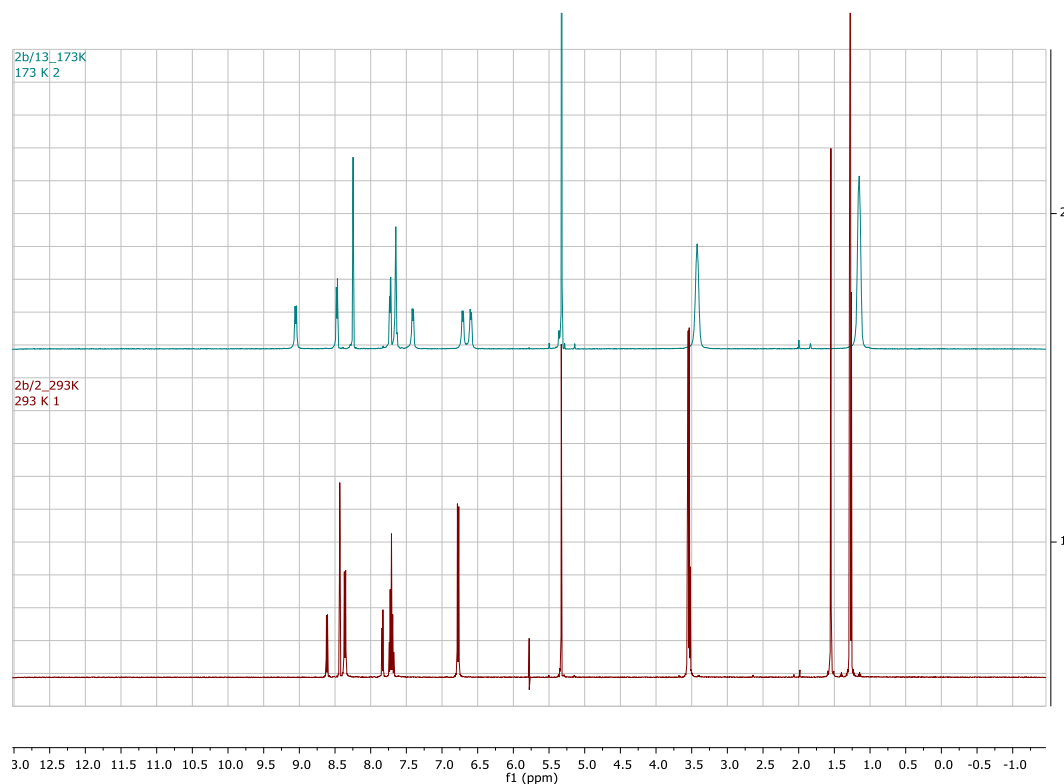

Fig. S7. Variable temperature <sup>1</sup>H NMR spectra of **2b** in CD<sub>2</sub>Cl<sub>2</sub> at RT (brown) and 173 K (green).

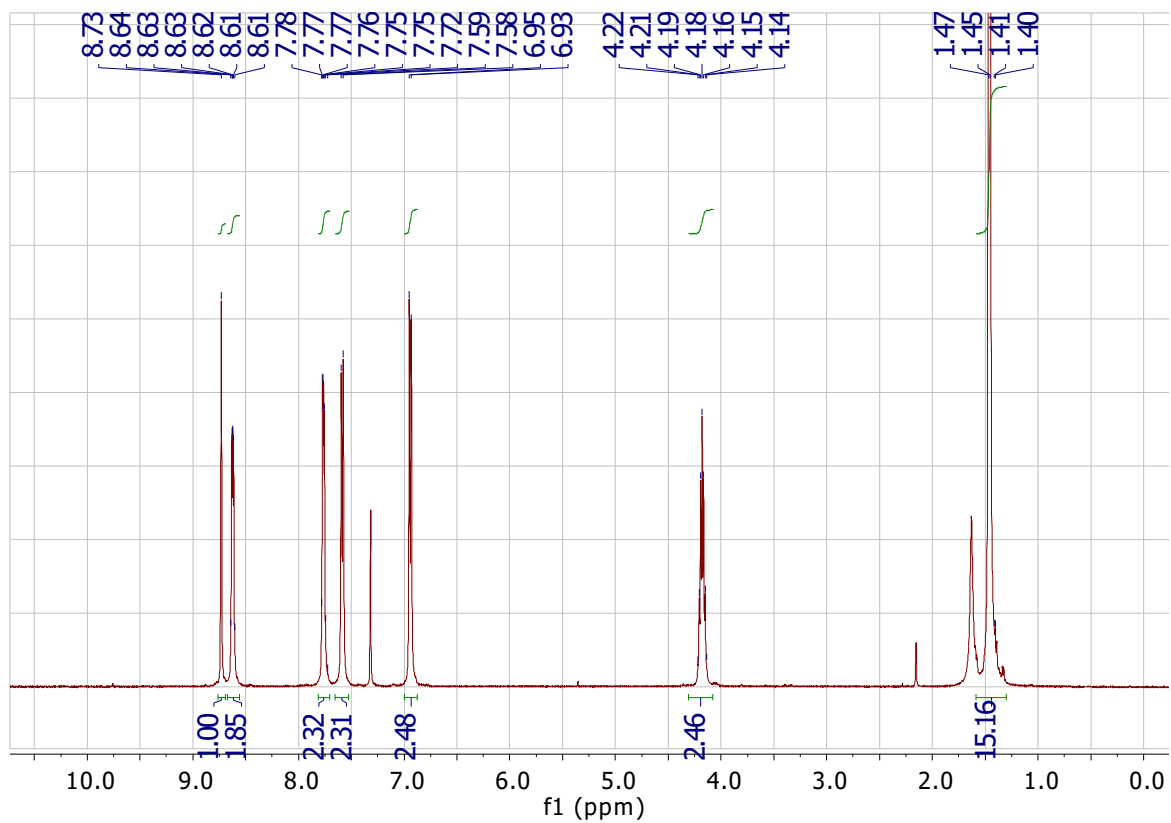

Fig. S8.  $^1\text{H}$  NMR spectrum of **3c** in  $\text{CD}_2\text{Cl}_2$ .

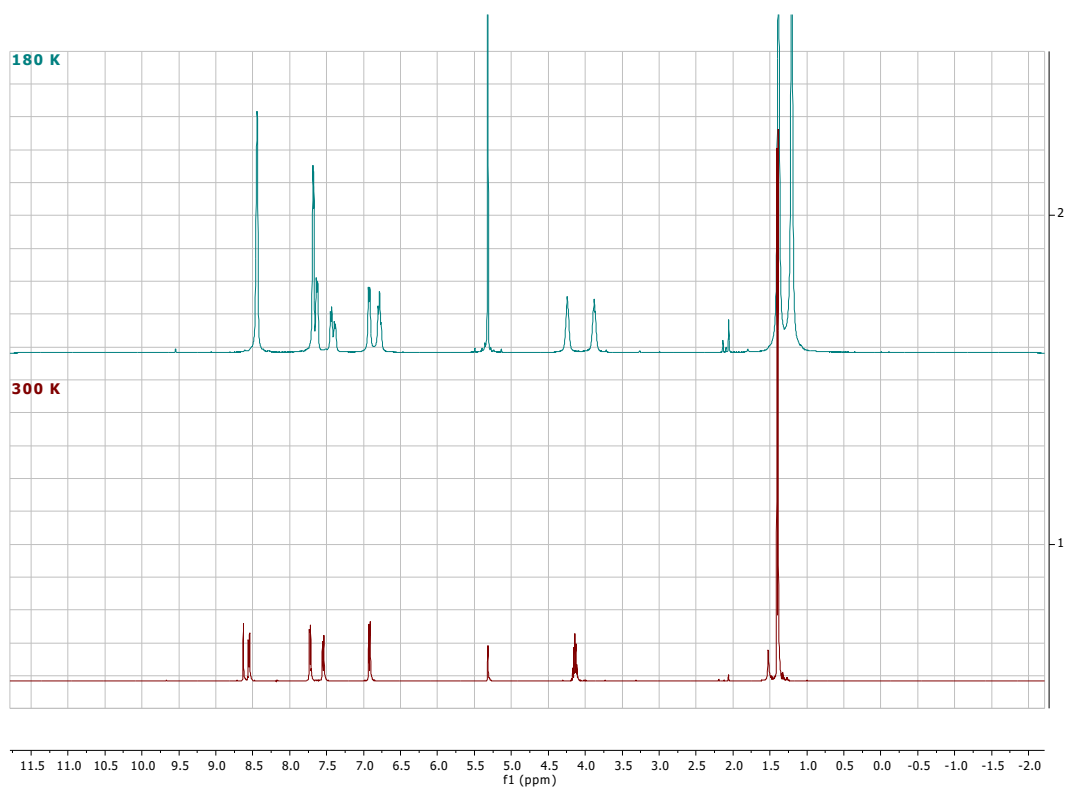

Fig. S9.  $^1\text{H}$  NMR spectrum of **3c** in  $\text{CD}_2\text{Cl}_2$  at 300 (brown) and 180 K (green).

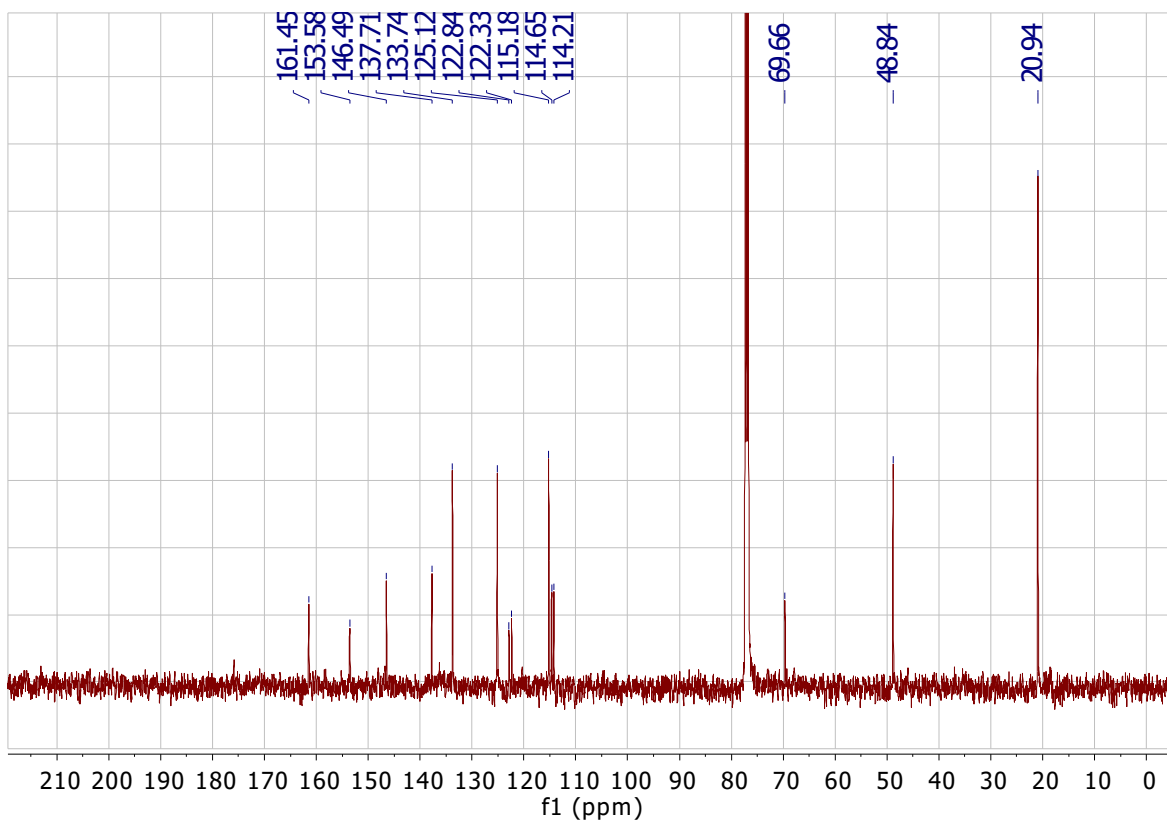

Fig. S10. <sup>13</sup>C NMR spectrum of **3c** in CDCl<sub>3</sub> at RT.

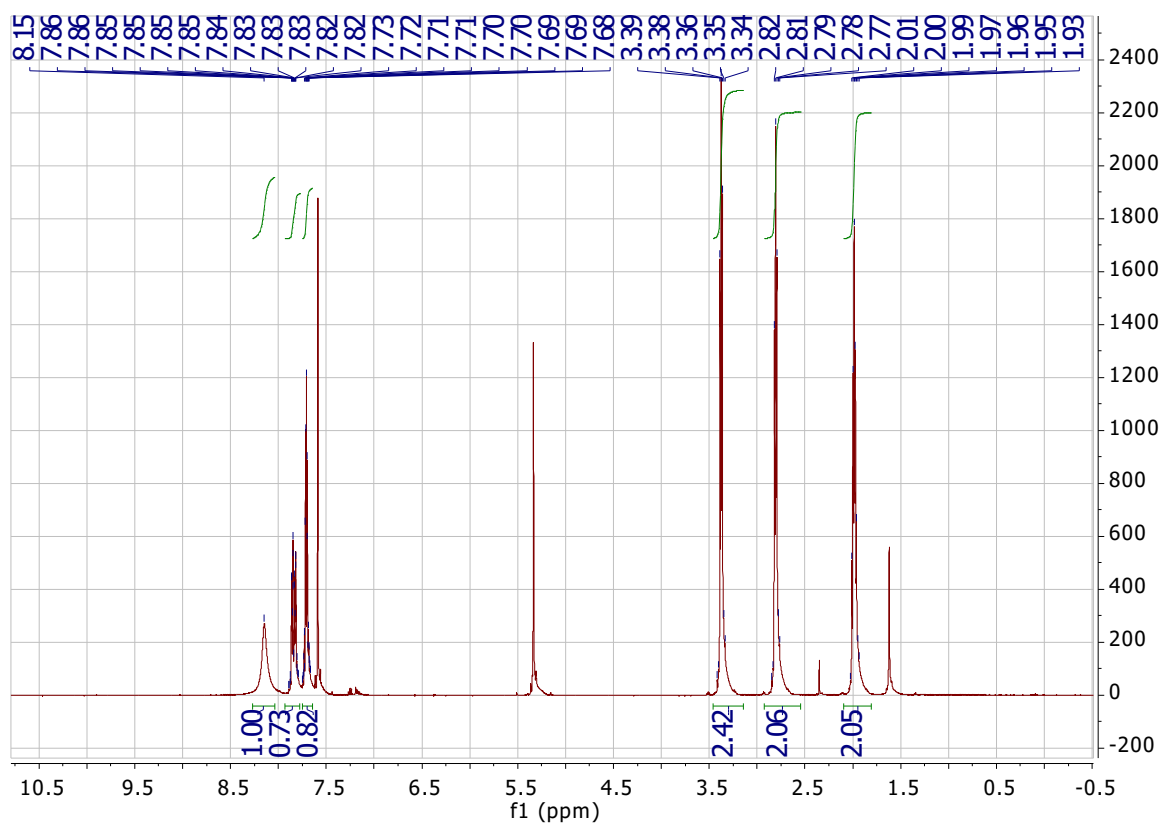

Fig. S11. <sup>1</sup>H NMR spectrum of **4** in CD<sub>2</sub>Cl<sub>2</sub> at RT.

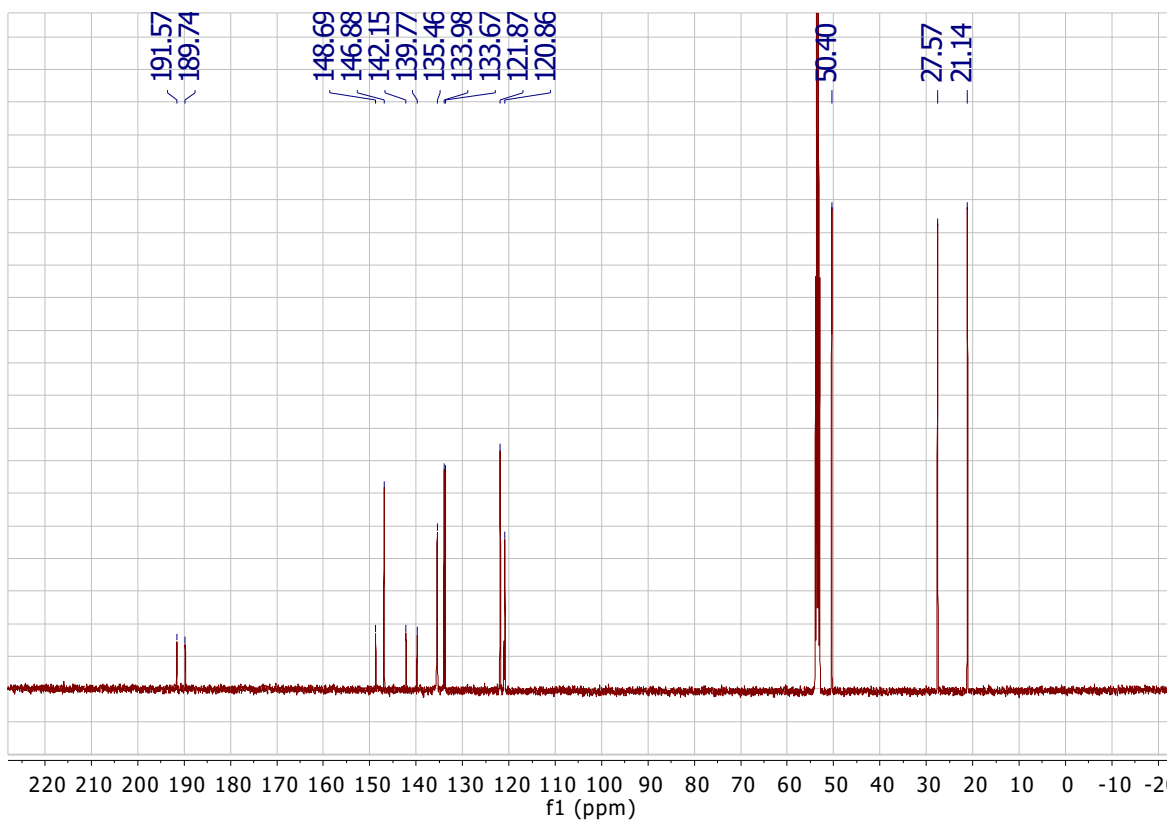

Fig. S12.  $^{13}\text{C}$  NMR spectrum of **4** in  $\text{CD}_2\text{Cl}_2$  at RT.

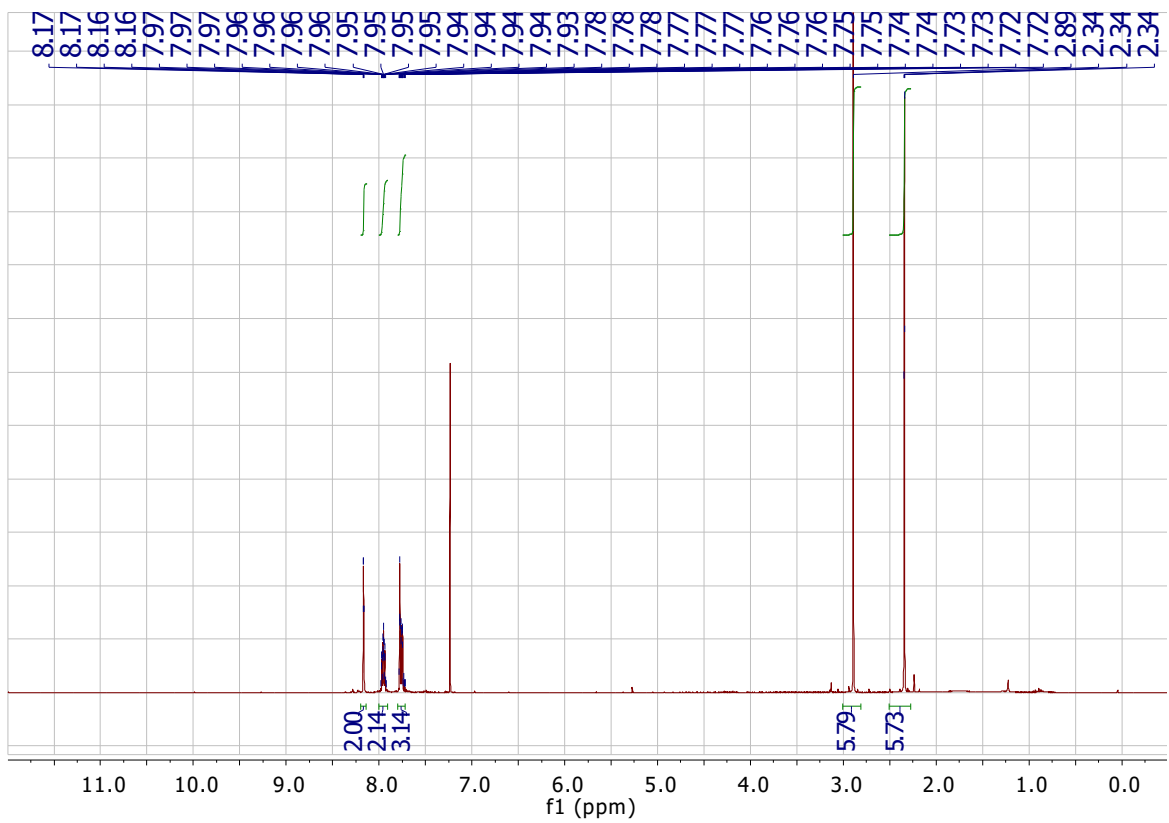

Fig. S13.  $^1\text{H}$  NMR spectrum of **5** in  $\text{CDCl}_3$ .



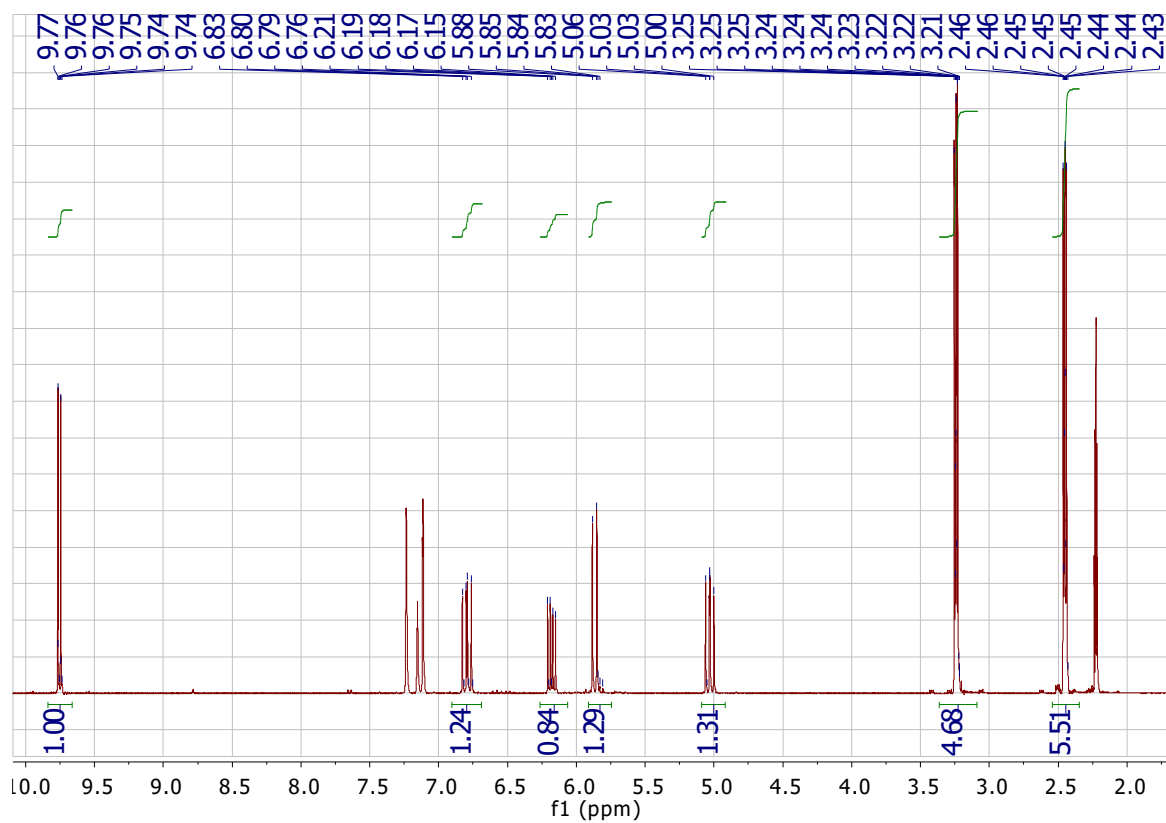

Fig. S14.  $^1\text{H}$  NMR spectrum of **6b** in  $\text{toluene-d}_8$  at RT.

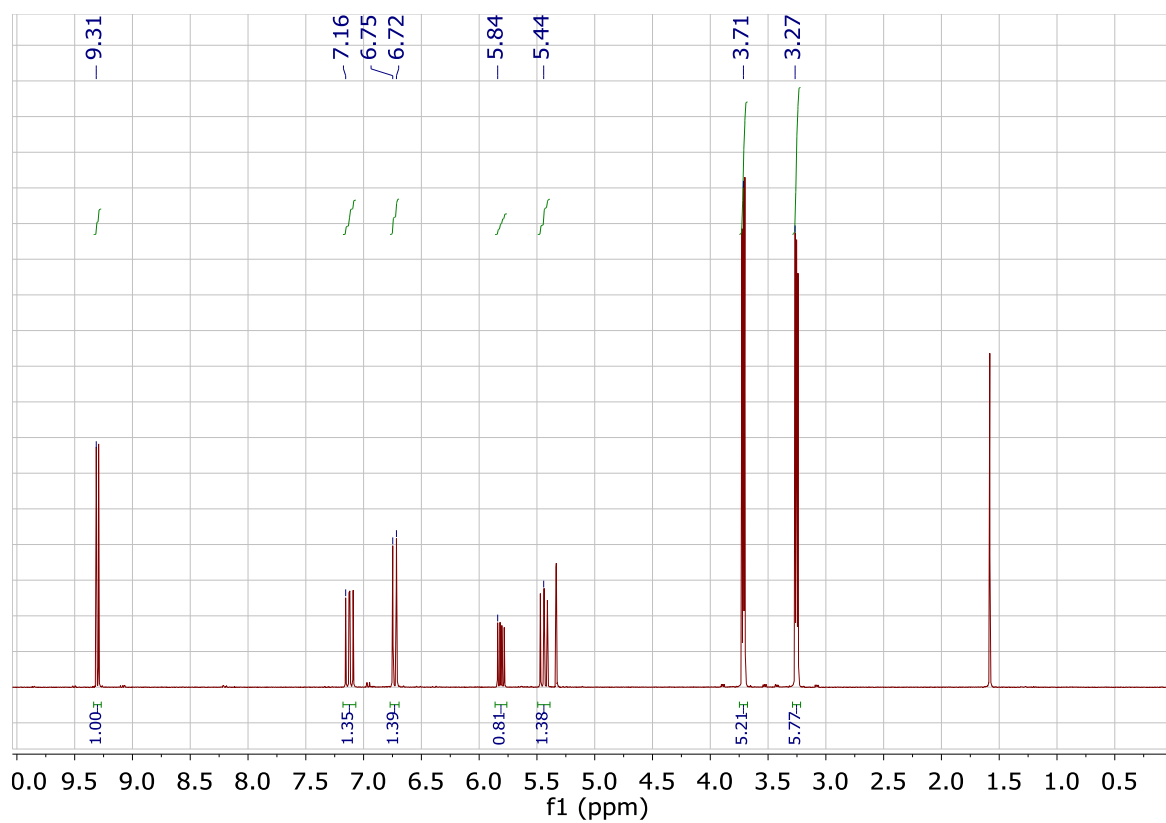

Fig. S15.  $^1\text{H}$  NMR spectrum of **6b** in  $\text{CD}_2\text{Cl}_2$  at RT.

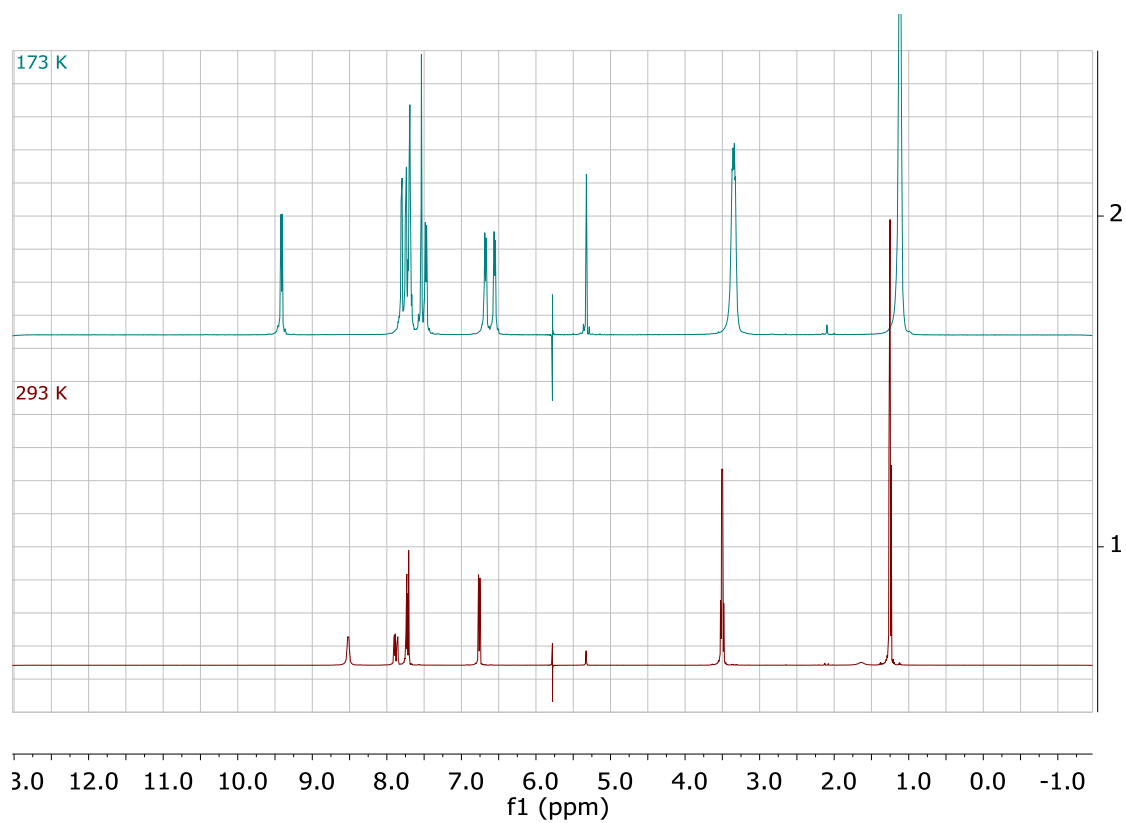

Fig. S16.  $^1\text{H}$  NMR spectrum of **6b** in  $\text{CD}_2\text{Cl}_2$  at 295 (brown) and 195 K (green).

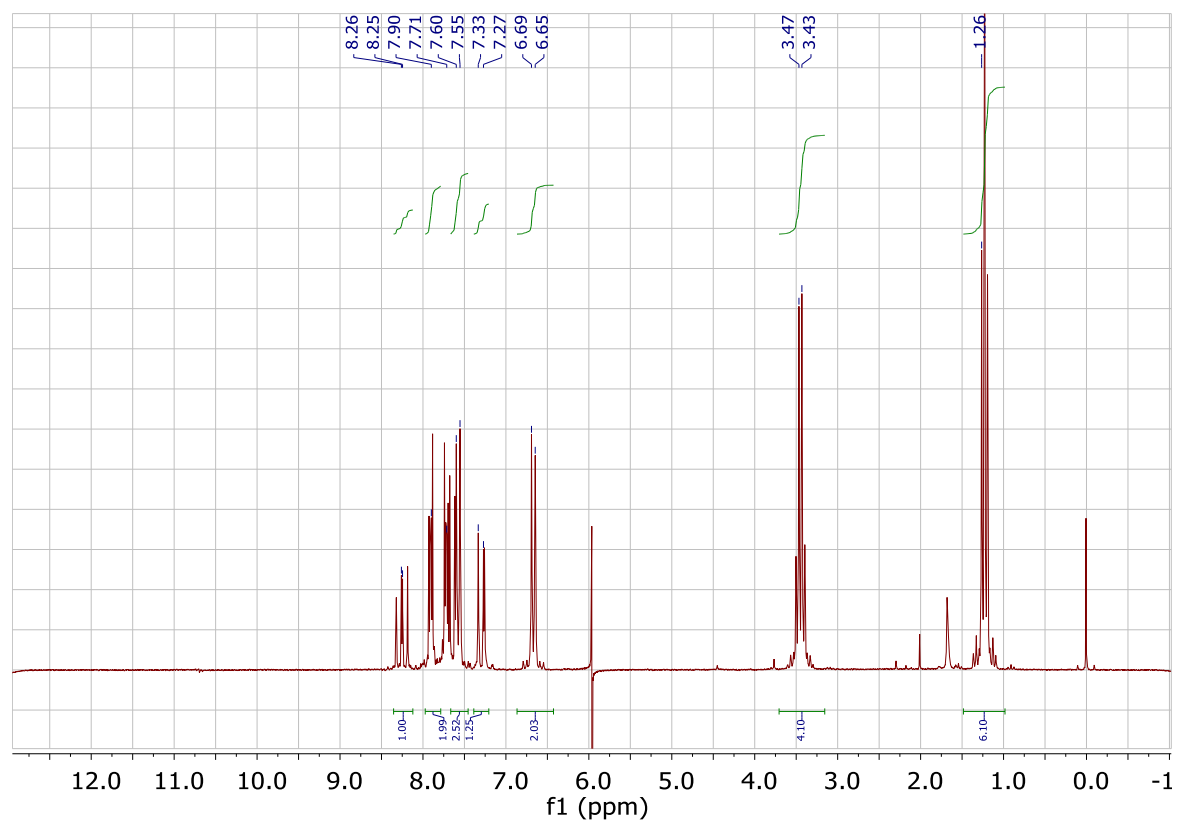

Fig. S17.  $^1\text{H}$  NMR spectrum of **7b** in  $\text{CDCl}_3$ .

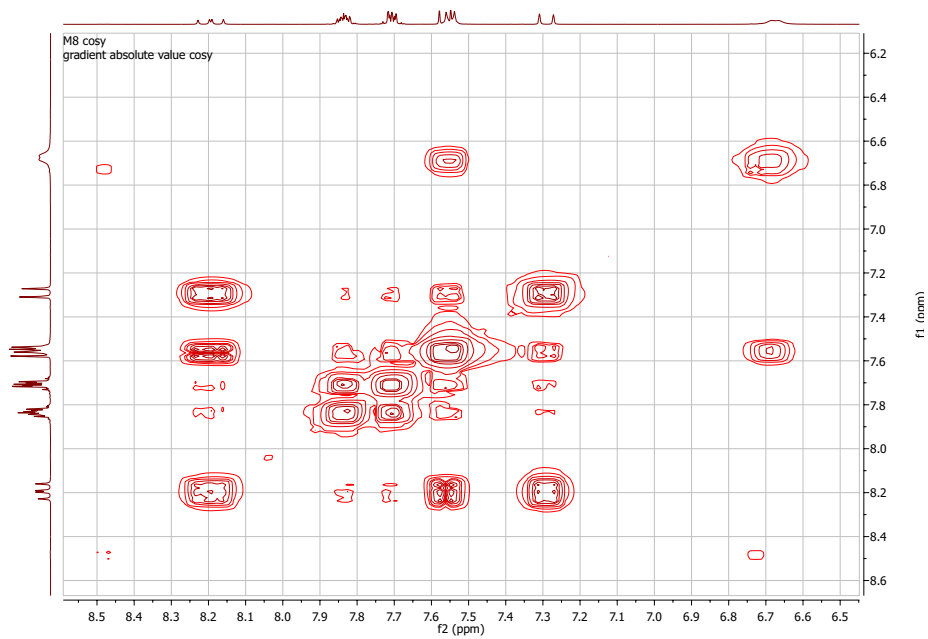

Fig. S18. COSY spectrum of **7b** in  $\text{CD}_2\text{Cl}_2$  at RT.

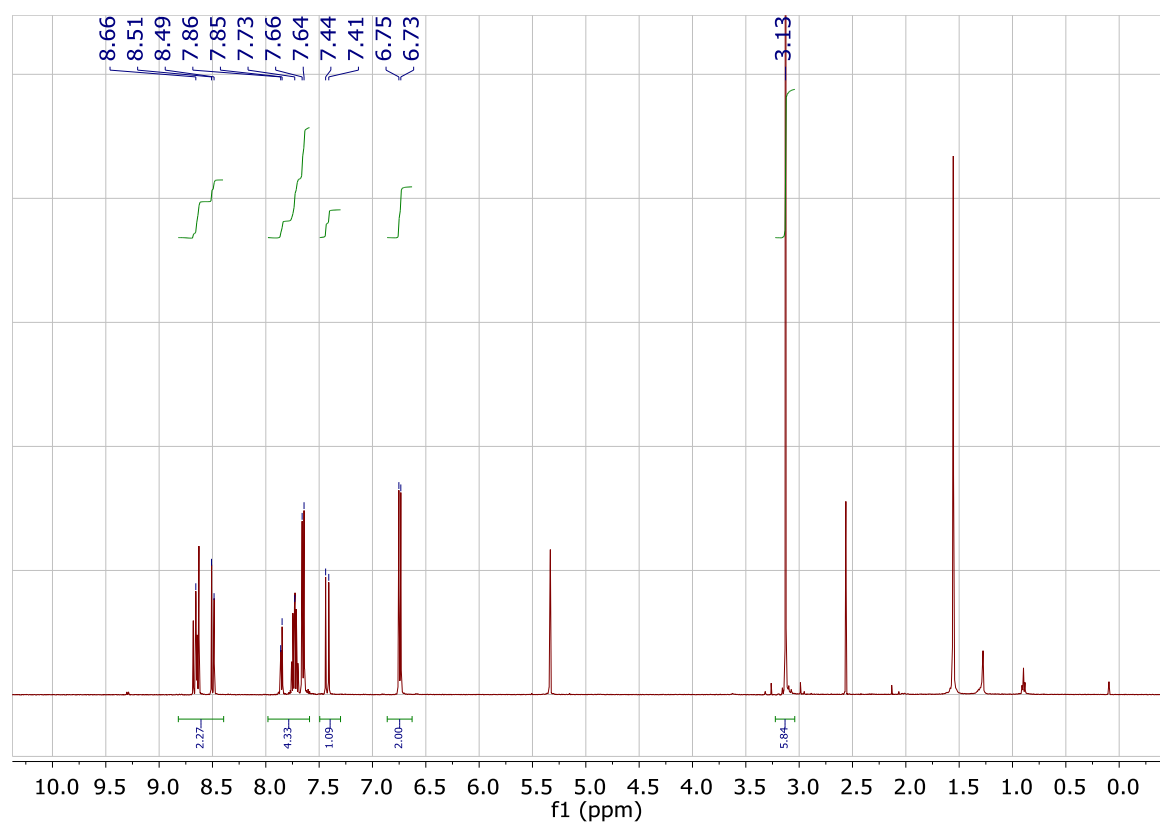

Fig. S19.  $^1\text{H}$  NMR spectrum of **8b** in  $\text{CD}_2\text{Cl}_2$ .

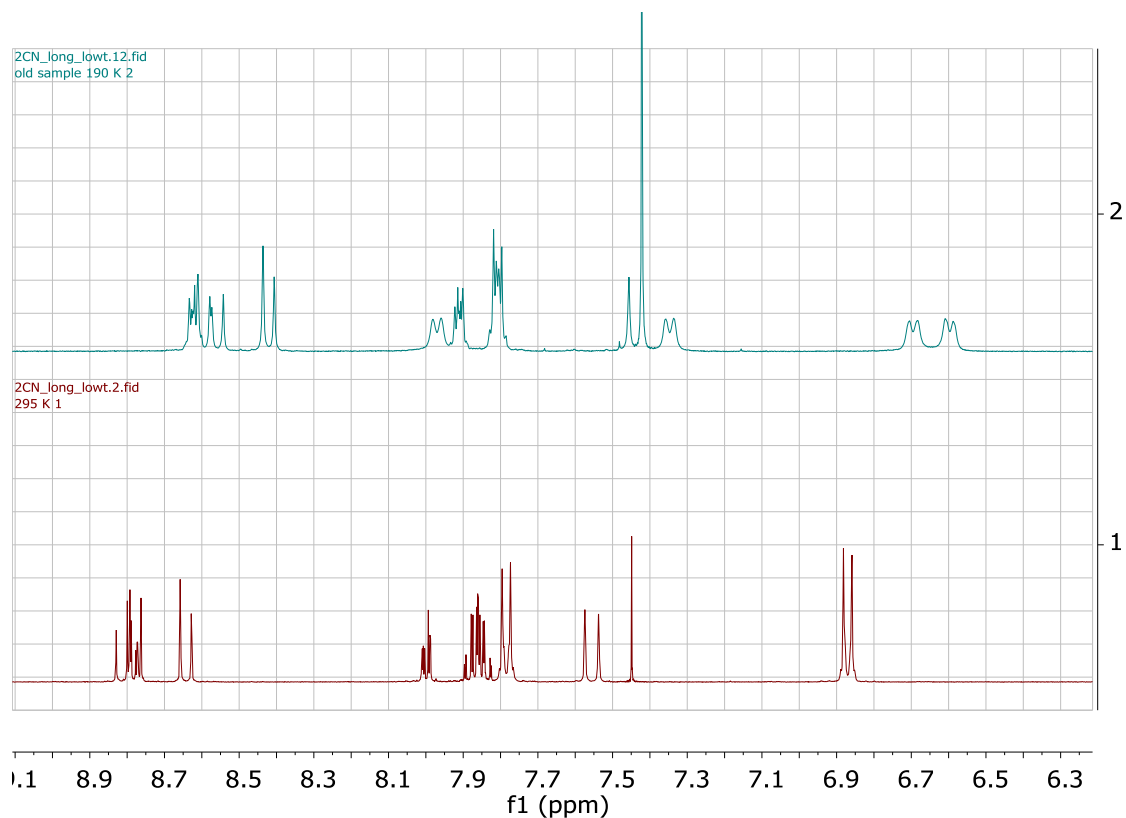

Fig. S20.  $^1\text{H}$  NMR spectrum of **8b** in  $\text{CD}_2\text{Cl}_2$  at 295 (brown) and 190 K (green).

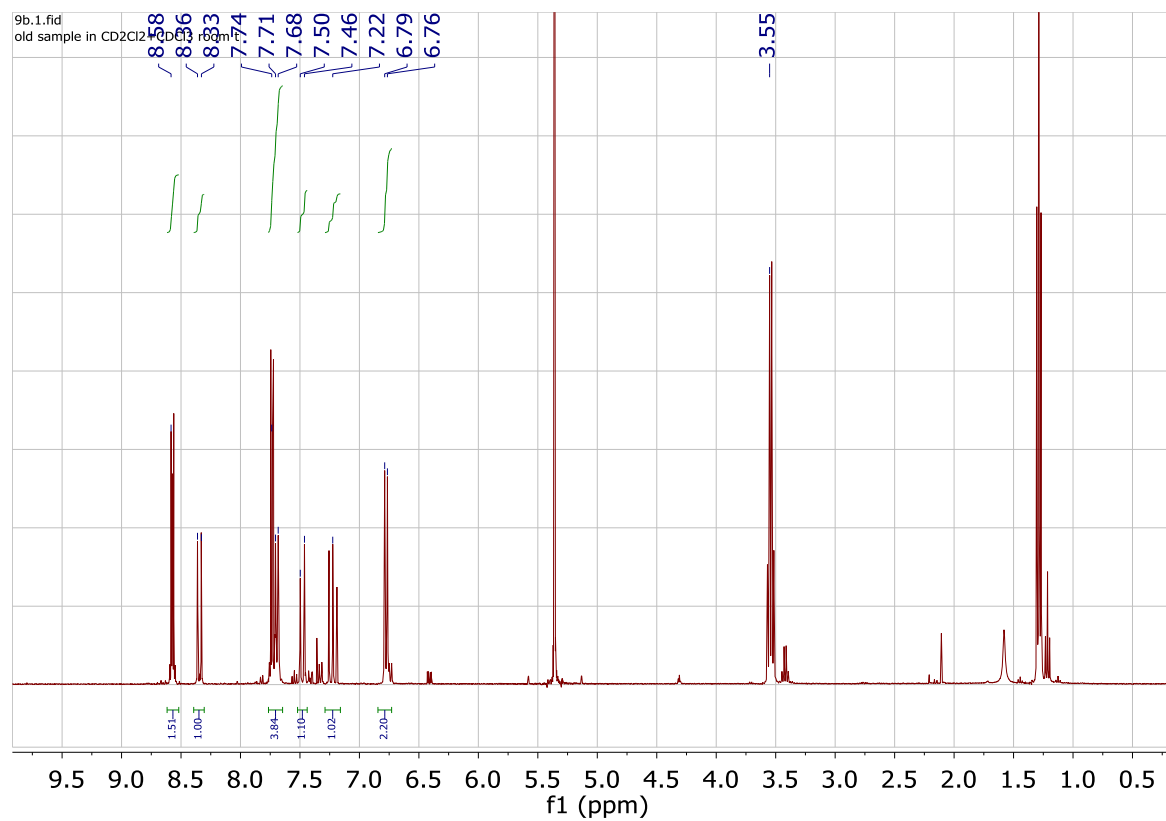

Fig. S21.  $^1\text{H}$  NMR spectrum of **9b** in  $\text{CD}_2\text{Cl}_2$ .

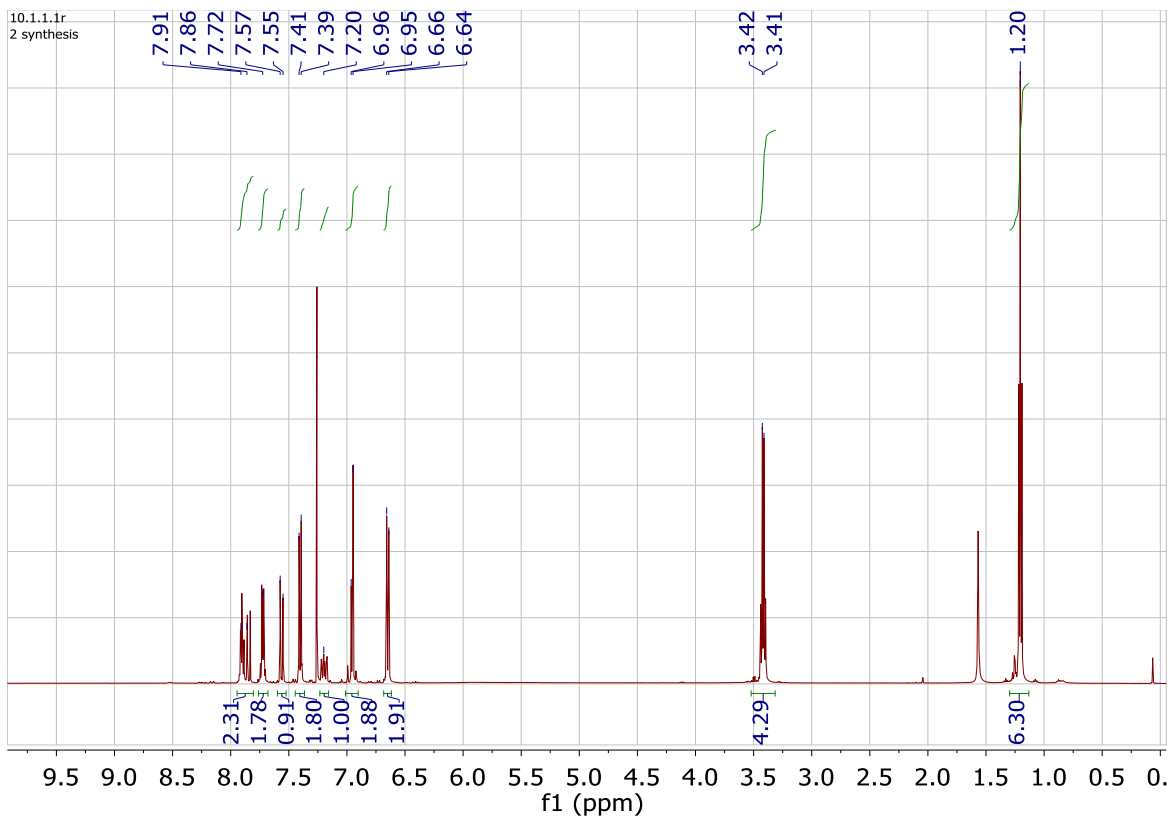

Fig. S22.  $^1\text{H}$ -NMR spectrum of **10b** in  $\text{CDCl}_3$ .

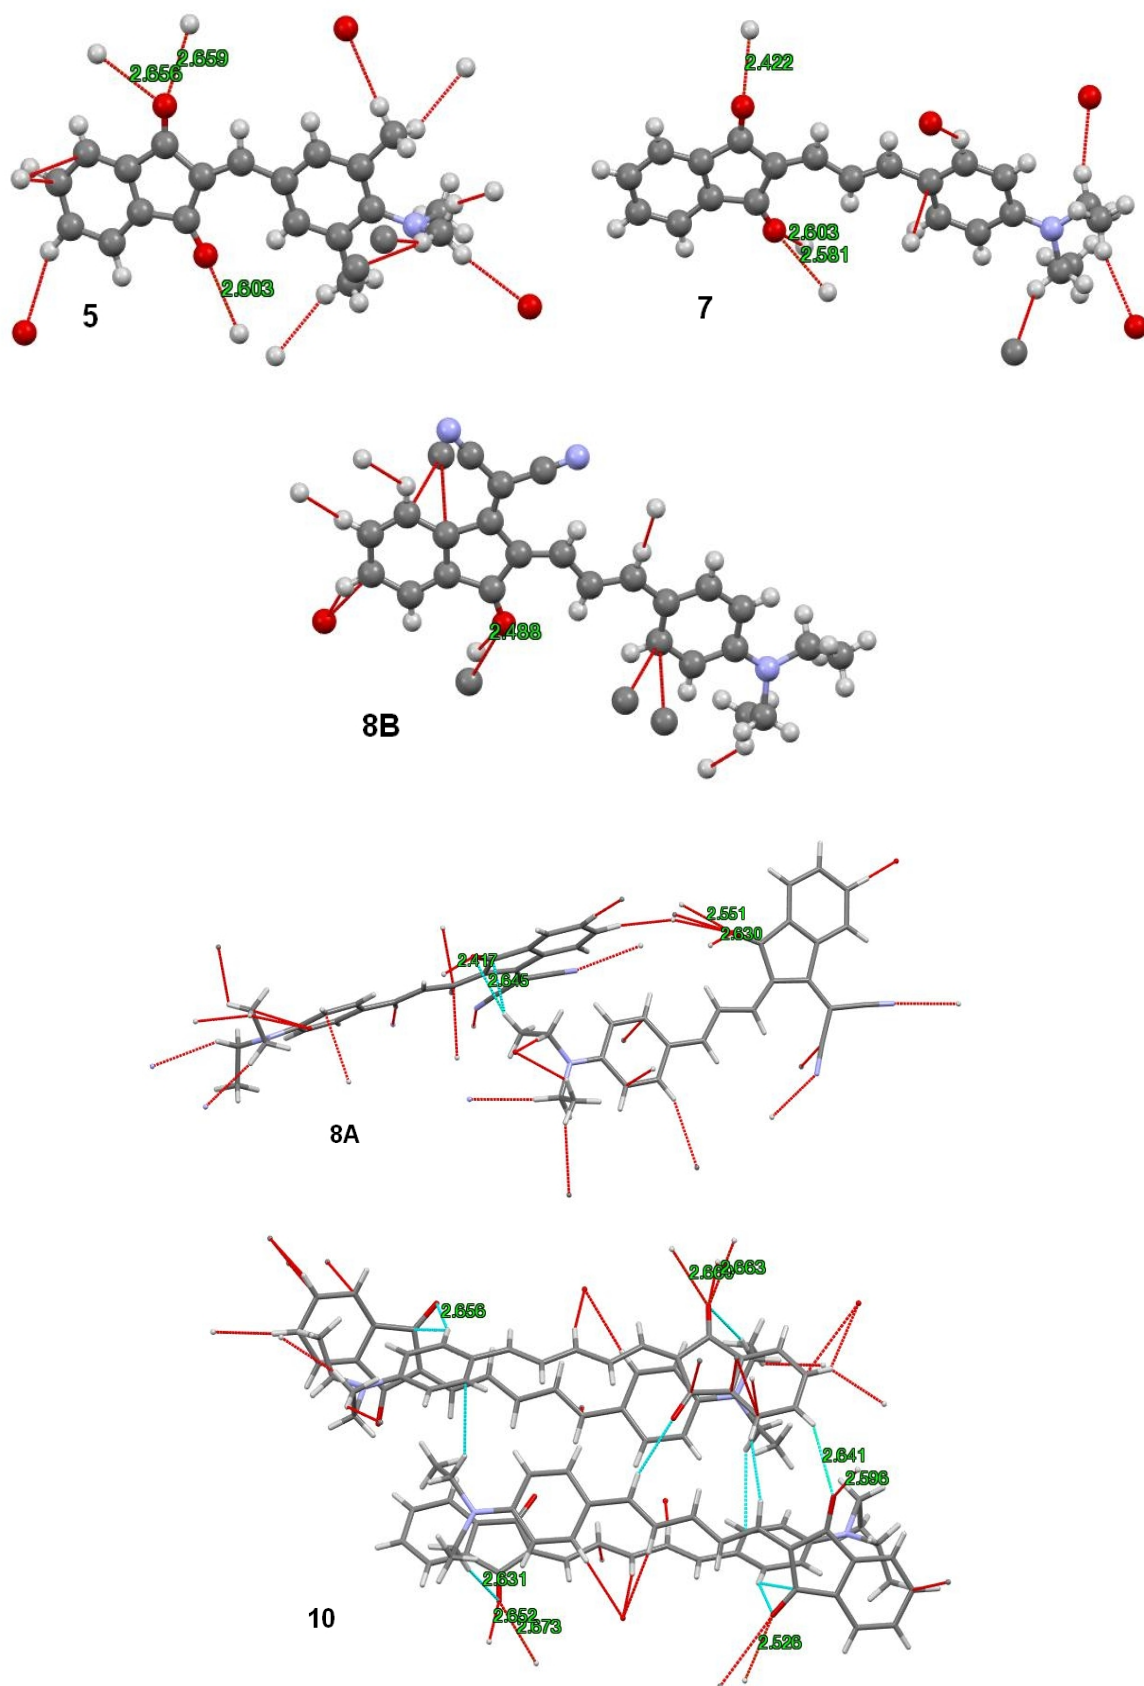

Fig. S23. Short contacts within the X-Ray structures of **5**, **7**, **8** and **10**. Only selected O...HC bond lengths are shown.

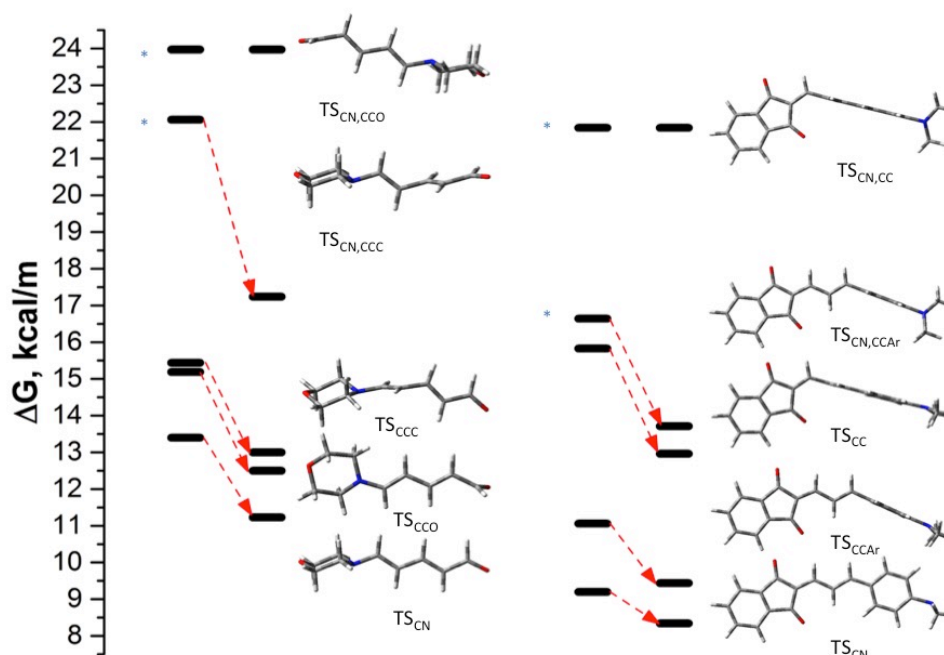

Fig. S24. Corrections of the calculated barriers to rotation for derivatives **6b** and **7a**. Two higher barriers (blue asterisks) are used to correct the lower barriers:  $TS_{CN,CCO}$  for  $TS_{CN,C-CC}$  and  $TS_{C-CC}$ ;  $TS_{CN,C-CC}$  for  $TS_{C-CO}$  and  $TS_{CN}$  (**6d**);  $TS_{CN,CC}$  for  $TS_{CN,CCAr}$  and  $TS_{CC}$ ;  $TS_{CN,CCAr}$  for  $TS_{CCAr}$  and  $TS_{CN}$  (**7a**).

Table S1. Calculated for derivative **1a** energies (a.u.) in dichloromethane: EE - electronic energies, ZPE - ZPE corrected energies,  $FE_{RT}$  - free energies at 298 K,  $FE_{204}$  - free energies at 204 K.  $B_{X-Y}$  - rotation barrier about X-Y bond (kcal/mol, corrected). Bonds (a), (b) and (c) are also shown in Chart 3.

|             | GS         | $TS_{C-C}$ | $TS_{C-N}$ | $TS_{C-C,N}$ |
|-------------|------------|------------|------------|--------------|
| DZ          |            |            |            |              |
| EE          | -900.26287 | -900.24331 | -900.24553 | -900.23498   |
| ZPE         | -899.97729 | -899.9597  | -899.96112 | -899.9521    |
| $FE_{RT}$   | -900.02498 | -900.00644 | -900.00659 | -899.99679   |
| $FE_{204K}$ | -900.00567 | -899.98753 | -899.98835 | -899.97881   |

$B_{C-C}(b)$ : 10.00;  $B_{C-N}(c)$ : 9.66 (kcal/mol, corrected).

|           | TZ         |            |            |            |
|-----------|------------|------------|------------|------------|
| EE        | -900.48034 | -900.46125 | -900.46307 | -900.4529  |
| ZPE       | -900.19459 | -900.17696 | -900.17815 | -900.16917 |
| $FE_{RT}$ | -900.24266 | -900.22369 | -900.22384 | -900.21381 |

$B_{C-C}(b)$ : 10.23;  $B_{C-N}(c)$ : 9.89 (kcal/mol, corrected).

Table S2. Calculated (DZ) for derivative **2a** energies (a.u.) in dichloromethane.

|                  | GS          | TS <sub>C-C</sub> | TS <sub>C-N</sub> | TS <sub>C-C,C-N</sub> |
|------------------|-------------|-------------------|-------------------|-----------------------|
| EE               | -1,048.8271 | -1,048.8082       | -1,048.8078       | -1,048.7998           |
| ZPE              | -1,048.521  | -1,048.504        | -1,048.5033       | -1,048.4961           |
| FE <sub>RT</sub> | -1,048.5741 | -1,048.5574       | -1,048.5551       | -1,048.5467           |

B<sub>C-C</sub>(b): 9.13; B<sub>C-N</sub>(c): 9.89 (kcal/mol, corrected).

Table S3. Calculated (DZ) for derivative **3a** energies (a.u.) in dichloromethane.

|                  | GS          | TS <sub>C-C</sub> | TS <sub>C-N</sub> | TS <sub>C-C,C-N</sub> |
|------------------|-------------|-------------------|-------------------|-----------------------|
| EE               | -1,197.387  | -1,197.3659       | -1,197.3681       | -1,197.3548           |
| ZPE              | -1,197.0609 | -1,197.0409       | -1,197.0433       | -1,197.0303           |
| FE <sub>RT</sub> | -1,197.1185 | -1,197.0977       | -1,197.0992       | -1,197.0852           |

B<sub>C-C</sub>(b): 11.74; B<sub>C-N</sub>(c): 10.51 (kcal/mol, corrected).

Table S4. Calculated (DZ) for derivative **4** energies (a.u.) in dichloromethane.

|                   | GS         | TS <sub>C-C</sub> | GS <sub>anh</sub> | TS <sub>C-C, anh</sub> |
|-------------------|------------|-------------------|-------------------|------------------------|
| EE                | -1055.138  | -1055.1176        | -1055.136         | -1055.1165             |
| ZPE               | -1054.78   | -1054.7616        | -1054.7766        | -1054.7596             |
| FE <sub>248</sub> | -1054.8177 | -1054.7987        | -1054.8116        | -1054.7957             |

B<sub>C-C</sub>: 11.92; B<sub>C-C<sub>Anh</sub></sub>: 9.98 kcal/mol

Table S5. Calculated (DZ) for derivative **5** energies (a.u.) in dichloromethane.

|                  | GS        | TS <sub>C-C</sub> | TS <sub>C-N</sub> | TS <sub>C-C,C-N</sub> |
|------------------|-----------|-------------------|-------------------|-----------------------|
| EE               | -978.8849 | -978.8708         | -978.8804         | -978.8697             |
| ZPE              | -978.5450 | -978.5330         | -978.5417         | -978.5325             |
| FE <sub>RT</sub> | -978.5949 | -978.5826         | -978.5915         | -978.5813             |

B<sub>C-C</sub>(b): 6.77; B<sub>C-N</sub>(c): 2.08 (kcal/mol, corrected).

Table S6. Calculated (TZ) for derivative **6d** energies (a.u.) in dichloromethane.

|                    | GS        | TS <sub>C-CO</sub> | TS <sub>C-N</sub> | TS <sub>C-C</sub> | TS <sub>C-C,C-N</sub> | TS <sub>C-CO,C-N</sub> |
|--------------------|-----------|--------------------|-------------------|-------------------|-----------------------|------------------------|
| EE                 | -556.1613 | -556.1358          | -556.1393         | -556.1356         | -556.1249             | -556.1215              |
| ZPE                | -555.9506 | -555.9266          | -555.9299         | -555.9263         | -555.9164             | -555.9133              |
| FE <sub>225K</sub> | -555.9773 | -555.9531          | -555.956          | -555.9527         | -555.9422             | -555.9391              |

B<sub>C-C</sub>: 13.00; B<sub>C-CO</sub>: 13.01; B<sub>C-N</sub>: 11.37 (kcal/mol, corrected).

Table S7. Calculated (DZ) for derivative **7a** energies (a.u.) in dichloromethane.

|                    | GS        | TS <sub>C-C</sub> | TS <sub>C-N</sub> | TS <sub>C-C<sub>Ar</sub></sub> | TS <sub>C-C<sub>Ar</sub>,C-N</sub> | TS <sub>C-C,C-N</sub> |
|--------------------|-----------|-------------------|-------------------|--------------------------------|------------------------------------|-----------------------|
| EE                 | -977.6829 | -977.6551         | -977.6674         | -977.6637                      | -977.6552                          | -977.6456             |
| ZPE                | -977.3639 | -977.3383         | -977.3498         | -977.3462                      | -977.3386                          | -977.3297             |
| FE <sub>215K</sub> | -977.3958 | -977.3706         | -977.3811         | -977.3782                      | -977.3693                          | -977.3610             |

B<sub>C-C</sub>(b): 12.96; B<sub>C-C<sub>Ar</sub></sub>: 9.44; B<sub>C-N</sub>(c): 8.34 (kcal/mol, corrected).



Table S8. Calculated (DZ) for derivative **8a** energies (a.u.) in dichloromethane.

|                    | GS          | TS <sub>C-C</sub> | TS <sub>C-N</sub> | TS <sub>C-CAr</sub> | TS <sub>C-CAr,C-N</sub> |
|--------------------|-------------|-------------------|-------------------|---------------------|-------------------------|
| EE                 | -1,126.2514 | -1,126.2202       | -1,126.2341       | -1,126.2294         | -1,126.2208             |
| ZPE                | -1,125.9114 | -1,125.8827       | -1,125.8954       | -1,125.8911         | -1,125.8833             |
| FE <sub>225K</sub> | -1,125.9489 | -1,125.9207       | -1,125.9323       | -1,125.929          | -1,125.9194             |

B<sub>C-C</sub>(b): 10.57; B<sub>C-CAr</sub>: 9.44 10.35; B<sub>C-N</sub>(c): 8.34 9.14 (kcal/mol, corrected).

Table S9. Calculated (DZ) for derivative **9a** energies (a.u.) in dichloromethane.

|                    | GS          | TS <sub>C-C(a)</sub> | TS <sub>C-C(b)</sub> | TS <sub>C-CAr</sub> | TS <sub>C-N(c)</sub> | TS <sub>C-C,C-N</sub> |
|--------------------|-------------|----------------------|----------------------|---------------------|----------------------|-----------------------|
| EE                 | -1,274.8114 | -1,274.7926          | -1,274.7788          | -1,274.7888         | -1,274.793           | -1,274.78             |
| ZPE                | -1,274.4512 | -1,274.4328          | -1,274.4207          | -1,274.4303         | -1,274.4342          | -1,274.4222           |
| FE <sub>242K</sub> | -1,274.4962 | -1,274.4777          | -1,274.4665          | -1,274.4748         | -1,274.4782          | -1,274.4654           |

B<sub>C-C</sub>(a): 9.93; B<sub>C-C</sub>(b): 14.75; B<sub>C-CAr</sub>: 9.44 11.33; B<sub>C-N</sub>(c): 8.34 10.09 (kcal/mol, corrected).

Table S10. Calculated dipole moments  $\mu$  (D) and zero-frequency hyperpolarizabilities  $\beta_0 \cdot 10^{30}$  (esu) for six unique rotamers of eight of derivative **1a** in dichloromethane.

|                                       | GS     | TSA1   | TSA2   | TSD1   | TSD2   | TSDA   |
|---------------------------------------|--------|--------|--------|--------|--------|--------|
| DZ (CH <sub>2</sub> Cl <sub>2</sub> ) |        |        |        |        |        |        |
| $\mu$ (D)                             | 8.0514 | 2.9789 | 2.4390 | 0.6585 | 2.170  | 2.9864 |
| $\beta_0 \cdot 10^{30}$ (esu)         | 135.99 | 5.53   | 8.87   | 32.26  | 32.64  | 8.79   |
| TZ (CH <sub>2</sub> Cl <sub>2</sub> ) |        |        |        |        |        |        |
|                                       | 7.9862 | 2.9367 | 2.4144 | 0.6668 | 2.1416 | 2.9378 |
|                                       | 131.69 | 5.236  | 8.874  | 31.51  | 31.169 | 8.52   |
| DZ (CH <sub>2</sub> Cl <sub>2</sub> ) |        |        |        |        |        |        |
|                                       | 7.5878 | 2.9221 | 2.4299 | 0.6940 | 2.0778 | 2.8464 |
|                                       | 116.34 | 4.664  | 7.991  | 29.28  | 28.98  | 7.442  |

Averaging:

$$(2 \cdot \text{TSA1} + \text{TSA2} + \text{TSD1} + \text{TSD2} + 2 \cdot \text{TSDA}) / 8$$

Table S11. Calculated (TZ) dipole moments  $\mu$  (D) for ten unique rotamers of ten of derivative **6a** in benzene and chloroform.

|            | GS     | TS1a  | TS1b   | TS1c  | TS2a  | TS2b   | TS2c  | TS3a | TS3b   | TS3c  |
|------------|--------|-------|--------|-------|-------|--------|-------|------|--------|-------|
| Benzene    |        |       |        |       |       |        |       |      |        |       |
| $\mu$ (D)  | 11.371 | 6.588 | 9.654  | 6.80  | 6.558 | 10.457 | 5.335 | 6.31 | 11.371 | 5.281 |
| Chloroform |        |       |        |       |       |        |       |      |        |       |
| $\mu$ (D)  | 12.828 | 7.130 | 10.908 | 7.348 | 6.975 | 11.748 | 5.659 | 6.84 | 12.82  | 4.721 |

Averaging:

$$(\text{TS1a} + \text{TS1b} + \text{TS1c} + \text{TS2a} + \text{TS2b} + \text{TS2c} + \text{TS3a} + \text{TS3b} + \text{TS3c}) / 10$$

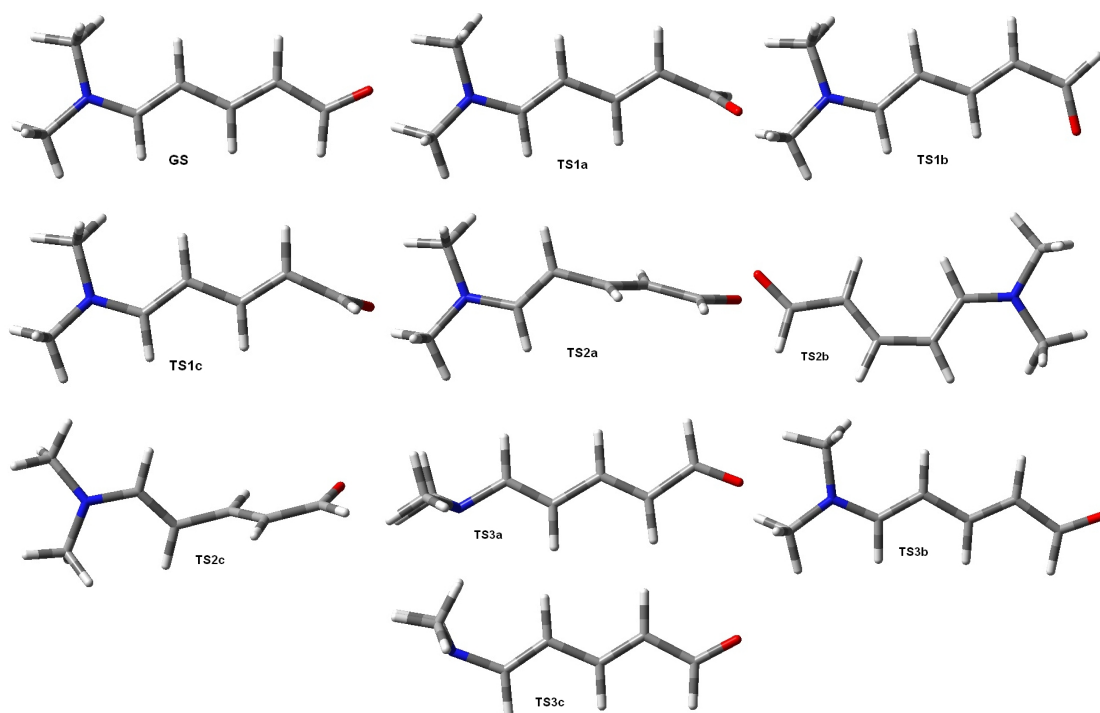

Fig. S25. Ten unique rotamers of ten of **6a** present in benzene solution at RT.

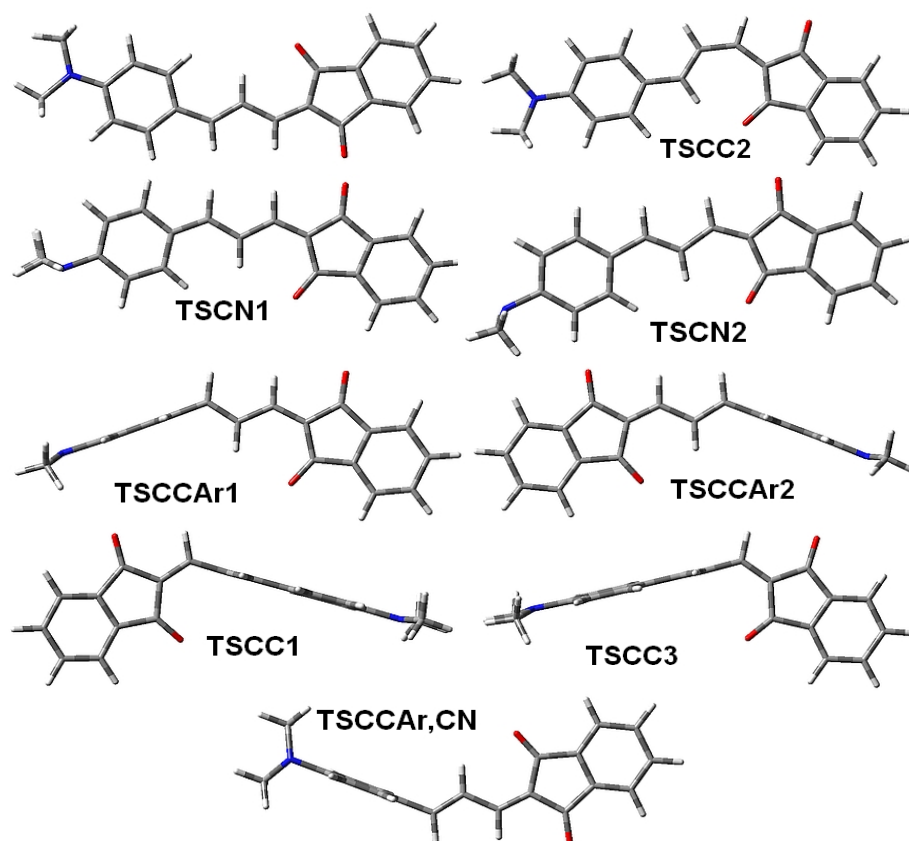

Fig. S26. Nine unique rotamers of 18 of **6a** present in dichloromethane and chloroform solutions at RT.

Table S12. Calculated (DZ) dipole moments  $\mu$  (D) and zero-frequency hyperpolarizabilities  $\beta_0 \cdot 10^{30}$  (esu) for nine unique rotamers of 18 of derivative **7a** in dichloromethane and chloroform.

Dichloromethane:

|                         | GS     | TS <sub>CC2</sub> | TS <sub>CN1</sub> | TS <sub>CN2</sub> | TS <sub>CCAr1</sub> | TS <sub>CCAr2</sub> | TS <sub>CC1</sub> | TS <sub>CC2</sub> | TS <sub>CCAr,CN</sub> |
|-------------------------|--------|-------------------|-------------------|-------------------|---------------------|---------------------|-------------------|-------------------|-----------------------|
| $\mu$ (D)               | 11.258 | 11.471            | 2.947             | 3.136             | 3.631               | 3.329               | 3.329             | 3.631             | 1.482                 |
| $\beta_0 \cdot 10^{30}$ | 345.9  | 316.62            | 105.06            | 104.5             | 24.67               | 25.43               | 25.43             | 24.67             | 11.47                 |

Chloroform:

|                         | GS     | TS <sub>CC2</sub> | TS <sub>CN1</sub> | TS <sub>CN2</sub> | TS <sub>CCAr1</sub> | TS <sub>CCAr2</sub> | TS <sub>CC1</sub> | TS <sub>CC2</sub> | TS <sub>CCAr,CN</sub> |
|-------------------------|--------|-------------------|-------------------|-------------------|---------------------|---------------------|-------------------|-------------------|-----------------------|
| $\mu$ (D)               | 10.509 | 10.733            | 2.836             | 3.031             | 3.521               | 3.380               | 3.556             | 3.268             | 1.432                 |
| $\beta_0 \cdot 10^{30}$ | 292.09 | 266.57            | 92.01             | 91.60             | 19.14               | 19.08               | 22.18             | 22.86             | 11.01                 |

Averaging:

$$(3 \cdot \text{GS} + \text{TS}_{\text{CC2}} + 2 \cdot \text{TS}_{\text{CN1}} + 2 \cdot \text{TS}_{\text{CN2}} + 4 \cdot \text{TS}_{\text{CCAr,CN}} + 2 \cdot \text{TS}_{\text{CCAr1}} + 2 \cdot \text{TS}_{\text{CCAr2}} + \text{TS}_{\text{CC1}} + \text{TS}_{\text{CC2}}) / 18$$
